# Supplementary material for: Patient safety issues and concerns in Bhutan’s healthcare system: a qualitative exploratory descriptive study
Source: PubMed Central journal article supplement — BMJ Open. 2018 Jul 30;8(7):e022788. doi: 10.1136/bmjopen-2018-022788 (PMC6067340; doi:10.1136/bmjopen-2018-022788), 2018-07-30
Supplement: bmjopen-2018-022788.draft_revisions.pdf [file bmjopen-2018-022788.draft_revisions.pdf]

# BMJ Open

BMJ Open is committed to open peer review. As part of this commitment we make the peer review history of every article we publish publicly available.

When an article is published we post the peer reviewers' comments and the authors' responses online. We also post the versions of the paper that were used during peer review. These are the versions that the peer review comments apply to.

The versions of the paper that follow are the versions that were submitted during the peer review process. They are not the versions of record or the final published versions. They should not be cited or distributed as the published version of this manuscript.

BMJ Open is an open access journal and the full, final, typeset and author-corrected version of record of the manuscript is available on our site with no access controls, subscription charges or pay-per-view fees (<http://bmjopen.bmj.com>).

If you have any questions on BMJ Open's open peer review process please email [info.bmjopen@bmj.com](mailto:info.bmjopen@bmj.com)

# BMJ Open

## Patient safety issues and concerns in Bhutan's healthcare system: a qualitative exploratory descriptive study

|                               |                                                                                                                                                                                                                                     |
|-------------------------------|-------------------------------------------------------------------------------------------------------------------------------------------------------------------------------------------------------------------------------------|
| Journal:                      | <i>BMJ Open</i>                                                                                                                                                                                                                     |
| Manuscript ID                 | bmjopen-2018-022788                                                                                                                                                                                                                 |
| Article Type:                 | Research                                                                                                                                                                                                                            |
| Date Submitted by the Author: | 09-Mar-2018                                                                                                                                                                                                                         |
| Complete List of Authors:     | Pelzang, Rinchen; Deakin University, School of Nursing and Midwifery<br>Hutchinson, Alison; Deakin University School of Nursing and Midwifery,<br>School of Nursing and Midwifery                                                   |
| Keywords:                     | Clinical governance < HEALTH SERVICES ADMINISTRATION &<br>MANAGEMENT, Health policy < HEALTH SERVICES ADMINISTRATION &<br>MANAGEMENT, Quality in health care < HEALTH SERVICES<br>ADMINISTRATION & MANAGEMENT, QUALITATIVE RESEARCH |
|                               |                                                                                                                                                                                                                                     |

SCHOLARONE™  
Manuscripts

Peer Review Only

1  
2  
3 **Title of the Manuscript:** Patient safety issues and concerns in Bhutan's healthcare system: a  
4 qualitative exploratory descriptive study  
5  
6  
7

8  
9 **Corresponding author's address:**

10 Dr Rinchen Pelzang

11 Higher Degree by Research Unit

12 School of Nursing and Midwifery

13 Deakin University

14 221 Burwood Highway

15 Melbourne VIC 3125

16 AUSTRALIA

17 E-mail: [rpelzang1970@gmail.com](mailto:rpelzang1970@gmail.com)

18 Phone number: +61 0457780018

19 Fax: +61 3 9627 4877  
20  
21  
22  
23  
24  
25  
26  
27  
28  
29  
30  
31  
32  
33  
34

35 **Authors:**

36 Dr Rinchen Pelzang\* [*Doctor of Philosophy (PhD), Master of Nursing Science (MNS),*  
37 *Postgraduate Diploma in Nursing Science – Clinical Education (PGDipNS-ClinEd),*  
38 *Bachelor of Nursing (BN), Diploma in Psychiatric Nursing (DPN), Diploma in General*  
39 *Nursing and Midwife (DGNM), Registered Nurse (RN)]*

40 Deakin University (School of Nursing and Midwifery)

41 75 Pigdons Rd

42 Geelong VIC 3216

43 AUSTRALIA  
44  
45  
46  
47  
48  
49  
50  
51  
52  
53  
54  
55  
56  
57  
58  
59  
60

1  
2  
3 Professor Alison M. Hutchinson [*Doctor of Philosophy (PhD), Master of Bioethics*  
4 [*MBioethics), Certificate in Midwifery (Cert Midwifery), Bachelor of Applied Science –*  
5 [*Advanced Nursing (BAppSci -Adv Nsg), Registered Nurse (RN)*]  
6  
7

8  
9 Deakin University (Centre for Quality and Patient Safety Research, School of Nursing and  
10 Midwifery); Monash Health  
11

12  
13 75 Pigdons Rd  
14

15  
16 Geelong VIC 3216  
17

18  
19 AUSTRALIA  
20

21  
22 **\*Corresponding author**  
23

24  
25  
26 **Keywords:** Bhutan, patient safety, clinical governance, medical errors, quality assurance  
27

28  
29  
30  
31 **Running title:** Patient safety issues and concerns in Bhutan  
32

33  
34  
35 **Total word counts:** *Abstract – 205*  
36

37  
38 *Text – 3687*  
39

40  
41  
42 **Ethical approval:** Ethical approvals were obtained from the Research Ethics Board of Health,  
43 Ministry of Health, Bhutan (REBH/Approval/2012/018) and the Deakin University Human Research  
44 Ethics Committee (DUHREC 2012-221) – *copies of approval letters can be provided on request.*  
45  
46  
47  
48  
49  
50  
51  
52  
53  
54  
55  
56  
57  
58  
59  
60

1  
2  
3 **Patient safety issues and concerns in Bhutan's healthcare system: a qualitative**  
4 **exploratory descriptive study**  
5  
6  
7

8  
9 **Abstract**

10  
11 **Objectives:** To investigate what healthcare professionals perceived and experienced as key  
12 patient safety concerns in Bhutan's healthcare system.  
13

14  
15 **Design:** Qualitative exploratory descriptive inquiry.  
16

17  
18 **Settings:** Three different levels of hospitals, a training institute and the Ministry of Health,  
19 Bhutan.  
20

21  
22 **Participants:** In total, 140 healthcare professionals and managers.  
23

24  
25 **Methods:** Narrative data were collected via conversational in-depth interviews and Nominal  
26 Group Meetings. All data were subsequently analyzed using thematic analysis strategies.  
27

28  
29 **Results:** The data revealed that medication errors, healthcare associated infections, diagnostic  
30 errors, surgical errors and post-operative complications, laboratory/blood testing errors, falls,  
31 patient identification and communication errors, were perceived as common patient safety  
32 concerns. Human and system factors were identified as contributing to these concerns.  
33 Instituting clinical governance, developing and improving the physical infrastructure of  
34 hospitals, providing necessary human resources, ensuring staff receive patient safety  
35 education, and promoting 'good' communication and information systems were, in turn, all  
36 identified as processes and strategies critical to improving patient safety in the Bhutanese  
37 healthcare system.  
38  
39

40  
41 **Conclusion:** Patient safety concerns described by participants in this study were  
42 commensurate with those identified in other low and middle-income countries. In order to  
43 redress these concerns, the findings of this study suggest that in the Bhutanese context patient  
44 safety needs to be conceptualised and prioritised.  
45  
46  
47

## Key words

Bhutan, patient safety, clinical governance, medical errors, quality assurance

## Strengths and limitations of this study (summary)

- Creating a deeper awareness and understanding of the patient safety issues and concerns in the cultural context of Bhutan is the key strength of this study.
- The reliance on patient safety concepts, theories and practices that have been developed and applied in high-income resource-rich nations is the main limitation of this study.
- The large quantity of data generated required decisions about inclusion and exclusion of data, informed by consistency of the findings across the disparate participant groups, which may have resulted in the loss of some material.

## Introduction

The World Health Organisation (WHO) has recognised patient safety as a global problem and positioned it as a worldwide endeavor, seeking to bring benefits to patients in countries rich and poor, developed and developing alike.<sup>1</sup> It is estimated that each year millions of patients worldwide suffer disabilities, injuries or death due to unsafe medical care, and that around 50% of these harmful outcomes are preventable.<sup>2,3</sup> The incidence and impact of preventable harmful events are particularly burdensome in developing and transitional-income countries.<sup>2</sup>

3

Despite patient safety being positioned by WHO as a global priority, improving patient safety outcomes in resource poor nations is challenging. One reason for this is a lack of reliable data to quantify the burden of unsafe patient care and, in turn, inform patient safety improvement

1  
2  
3 initiatives.<sup>4</sup> Another reason is that most current data on patient safety come from developed  
4  
5 or high-income countries, where the healthcare contexts are different and where processes for  
6  
7 improving patient safety outcomes cannot be readily transferred to other (less resourced)  
8  
9 countries and their local healthcare settings.<sup>5 6</sup> Even so, it is estimated that rates of adverse  
10  
11 events in low-income countries are higher than those of high-income countries. For example,  
12  
13 the risk of healthcare associated infections in low-income countries is estimated to be 20  
14  
15 times higher than in high-income countries.<sup>7</sup> Similarly, research evidence suggests the  
16  
17 prevalence of preventable surgical adverse event rates in low-income countries is five times  
18  
19 more than in high-income countries.<sup>8</sup>  
20  
21  
22  
23

24 In Bhutan, patient safety issues are not well documented or known. To date there have been  
25  
26 no published studies scoping either the nature or impact of patient safety concerns in  
27  
28 Bhutan's healthcare system. Thus, at this time, as noted in the WHO *Global priorities for*  
29  
30 *patient safety research*,<sup>4</sup> the main option for informing strategies aimed at improving patient  
31  
32 safety in Bhutan is to scope stakeholders' perceptions and personal experiences of patient  
33  
34 safety processes. It is anticipated that by undertaking preliminary scoping work a better  
35  
36 understanding can be gained of the nature and extent of patient safety concerns in the  
37  
38 Bhutanese context and what is required to redress these.  
39  
40  
41  
42  
43

44 The aim of this study was to scope and describe what stakeholders (clinicians, health service  
45  
46 managers, educators and policy makers) perceived and personally experienced as being the  
47  
48 most common patient safety concerns in the Bhutanese healthcare system. The three research  
49  
50 questions guiding the study were:  
51  
52  
53  
54  
55  
56  
57  
58  
59  
60

- What are healthcare professionals' and managers' knowledge, perceptions, understanding, and experiences of patient safety in Bhutan's hospitals?
- What factors do healthcare professionals and managers identify as most contributing to patient safety concerns in Bhutan's hospitals?
- What strategies do healthcare professionals and managers suggest are needed in order to address the patient safety issues and concerns they identified?

## **Methods**

### ***Study design***

This study was undertaken as a naturalistic inquiry using a qualitative exploratory descriptive research approach.

### ***Settings and participants***

The study was conducted in three levels of hospital (district, regional referral and national referral), a training institute and the Ministry of Health in Bhutan. A sample of 94 participants (doctors, nurses, ward managers, senior managers and health assistants) was purposively recruited and interviewed. Of those interviewed, the majority (n=56) were male and the age range of participants was 23 to 60 years (mean 36.7 years). The majority of participants (n=33) had a diploma as their highest professional qualification, followed by master's degree (n=32), bachelor degree (n=23) and certificate (n=6). Length of service ranged from six months to 29 years (mean 12.7 years). Additionally, 46 healthcare professionals participated in Nominal Group Meetings (NGMs). Of those that participated in NGMs, the majority (n=24) were male and participants' age range was 24 to 50 years (mean 35.6 years). The majority of NGM participants (n=26) had a diploma as their highest professional qualification, followed by bachelor (n=9), master degree (n=9), and certificate



1  
2  
3 (n=2). Length of service of NGM participants ranged from six months to 22 years (mean 10.2  
4  
5 years).

### 6 7 8 9 ***Patient and public involvement***

10  
11 As the aim of this study was to scope and describe what healthcare professionals perceived  
12  
13 and personally experienced as being the most common patient safety concerns in the  
14  
15 Bhutanese healthcare system no patients were involved in this study.

### 16 17 18 19 ***Data collection procedure***

20  
21 Data were collected via in-depth interviews (n=94) and NGMs (n=5). Participants for in-  
22  
23 depth interviews were invited through direct contact, flyers posted on staff noticeboards and  
24  
25 invitation letters sent to participating wards/institutes. They were interviewed individually  
26  
27 using broad semi-structured interview questions to elicit knowledge, perceptions, and  
28  
29 experiences of patient safety in Bhutan. Participants for NGMs were nominated by their  
30  
31 managers and the NGMs were conducted in different groups according to criterion based  
32  
33 characteristics such as doctors, nurses and managers. To facilitate smooth NGMs, a nominal  
34  
35 group task statement form, which specified the exploratory questions, was used to list the  
36  
37 critical elements of the patient safety issues. Duration of individual interviews and NGMs  
38  
39 ranged from 45 to 120 minutes.

40  
41  
42  
43  
44  
45  
46 Approval was received from the Research Ethics Board of Health, Ministry of Health, Bhutan  
47  
48 (REBH/Approval/2012/018) and organisational consent was obtained from the five research  
49  
50 sites from which participants were recruited and other materials were retrieved. Ethics  
51  
52 approval was also obtained from the Human Research Ethics Committee of ([University  
53  
54  
55  
56  
57  
58  
59  
60

1  
2  
3 blinded]). All participants were informed about the nature and purpose of the study and  
4 provided verbal or written consent prior to interview or participation in a NGM.  
5  
6  
7

### 8 9 **Data analysis**

10 Narrative data obtained from interviews and NGMs were analysed using the following steps:  
11 verbatim transcription of audio-recordings, active reading of transcripts, making notes on  
12 general themes, re-reading transcripts, comparing transcripts with key themes and concepts,  
13 making categories describing all aspects of the content, excluding unusable content or fillers,  
14 re-reading transcripts alongside the finally agreed list of categories, and making adjustments  
15 as necessary<sup>9</sup>. The data collected and analysed are reported and discussed in aggregate in this  
16 article - no additional data is available.  
17  
18  
19  
20  
21  
22  
23  
24  
25  
26  
27

### 28 29 **Results**

30 This study revealed eight major patient safety concerns, possible factors contributing to them,  
31 and recommendations for strategies which could be used for addressing the concerns  
32 identified. The results are presented according to these areas.  
33  
34  
35  
36  
37  
38  
39

#### 40 **Patient safety issues and concerns**

41 Participants identified the following patient safety issues: medication/drug errors, healthcare  
42 associated infections, surgical errors and post-operative complications, diagnostic errors,  
43 laboratory/testing errors, injurious falls, communication errors, and patient identification  
44 errors (themes and supporting quotes are provided in Table 1).  
45  
46  
47  
48  
49  
50  
51

52 *Medication/drug errors:* Medication error was the most common patient safety concern  
53 identified. Errors included administering wrong drugs to the wrong patient, administering  
54  
55  
56  
57

1  
2  
3 drugs that had passed their expiry date, giving the wrong drug dose, continuation of drugs for  
4 unjustified periods of time, and drug omissions (failure to administer prescribed drugs).  
5  
6  
7 'Irrational' use of drugs was also described, manifested as prescribing of: large quantities of  
8  
9 drugs; high drug doses that could not be justified or were outside recommended doses; and  
10  
11 antibiotics to treat non-bacterial infections or viral conditions.  
12  
13

14  
15  
16 *Healthcare Associated Infections (HAIs):* Post-surgery wound infections and urinary tract  
17  
18 infections (due to healthcare professionals not adhering to sterile technique during  
19  
20 catheterisation) were the two main HAIs identified.  
21  
22

23  
24 *Surgical errors and post-operative complications:* Notable among the surgical-related patient  
25  
26 safety concerns were retention of foreign objects (e.g., gauze or instruments). In some  
27  
28 instances, surgical errors resulted in mortality.  
29  
30

31  
32  
33 *Diagnostic errors:* Errors in diagnosis were perceived as common (e.g., wrongly diagnosing  
34  
35 a patient as having tuberculosis, when they had cancer, and vice versa).  
36  
37

38  
39  
40 *Laboratory/blood testing errors:* Incompatible blood transfusion errors were reported.  
41  
42 Common laboratory/blood testing errors included performing wrong or unnecessary blood  
43  
44 investigations, and issuing wrong laboratory reports.  
45  
46

47  
48 *Fall injuries:* This involves patients falling from beds and trolleys.  
49  
50  
51  
52  
53  
54  
55  
56  
57  
58  
59  
60

*Communication errors:* Communication errors, verbal abuse and/or rude behavior towards patients, and failure to communicate clearly to patients about their disease and treatment were identified.

*Patient identification errors:* The lack of a formal patient identification system was reported. This was considered particularly problematic since Bhutanese people often have the same or similar names. A major consequence of this was the risk and incidence of patients receiving the wrong treatment or procedure.

**Table 1.** Patient safety issues and concerns

| Themes                                  | Participant statements                                                                                                                                                                                                                                                                                                                                                                                                                                                                                  |
|-----------------------------------------|---------------------------------------------------------------------------------------------------------------------------------------------------------------------------------------------------------------------------------------------------------------------------------------------------------------------------------------------------------------------------------------------------------------------------------------------------------------------------------------------------------|
| Medication/drug errors                  | <p>“I think the most common is errors in drug doses and medications. [...] medication error includes errors in giving IV fluids like sometimes wrong IV fluids, wrong rate of administration – improper calculation of the drop rates” (Medical doctor).</p> <p>“[...] misuse of antibiotics – sometimes you continue antibiotics even for cough and cold where it is not required. They [doctors] use high dosage of different antibiotics for organisms that are not sensitive” (Medical doctor).</p> |
| Healthcare Associated Infections (HAIs) | <p>“Infection is definitely an issue. Previously where I used to work, [...] in a small district hospital, usually patient with small surgery – minor surgery was getting post-surgery wound infection. Wound not healing faster” (Senior Manager).</p>                                                                                                                                                                                                                                                 |

|                                                  |                                                                                                                                                                                                                                                                                                                                                                                                                                                                 |
|--------------------------------------------------|-----------------------------------------------------------------------------------------------------------------------------------------------------------------------------------------------------------------------------------------------------------------------------------------------------------------------------------------------------------------------------------------------------------------------------------------------------------------|
|                                                  | <p>“We do come across hospital acquired infections – people especially with long term hospitalisation tend to get urinary tract infections. I don’t know how people [healthcare providers] are handling the catheterisation process” (Medical doctor).</p>                                                                                                                                                                                                      |
| Surgical errors and post-operative complications | <p>“We always hear from the operation theatre that some gauze pieces or some instrument has been left inside” (Nurse).</p>                                                                                                                                                                                                                                                                                                                                      |
| Diagnostic errors                                | <p>“They [doctors] misdiagnose and then sometimes they give wrong medication which I have seen in one case that the patient really had adverse effect” (Nurse).</p>                                                                                                                                                                                                                                                                                             |
| Laboratory/blood testing errors                  | <p>“Sometimes there are few laboratory mistakes. I don’t know whether it is the printing mistakes, sometimes we send two samples almost within 2 to 3 hours gap and the report come completely different. Maybe because staff are giving wrong sample for the other patient or is the printing mistake from the lab [...]. We have cases like same patient having done the same investigations in few hours showed vast difference in the reading” (Nurse).</p> |
| Fall injuries                                    | <p>“While patient is transferred in the trolley there was one incident where the patient went off the trolley. And then few times we have heard patient falling from the bed. So fall is common” (Ward Manager).</p>                                                                                                                                                                                                                                            |
| Communication errors                             | <p>“Most of the time the misunderstanding that happens between the patient and the staff is due to lack of adequate communication. Many a times what we have done is for example probably not</p>                                                                                                                                                                                                                                                               |

|                               |                                                                                                                                                                                                                                                                                                                                                                                                              |
|-------------------------------|--------------------------------------------------------------------------------------------------------------------------------------------------------------------------------------------------------------------------------------------------------------------------------------------------------------------------------------------------------------------------------------------------------------|
|                               | <p>spend enough time on that part - explaining the diagnosis, where is the problem, what medicine you are prescribing, how you need to take that medicine, what are the side effects of the medicines, all these things, you know” (Senior Manager - NGM1).</p> <p>“I think one complaint we hear is that of verbal abuse by the health professionals to patients and their relatives” (Senior Manager).</p> |
| Patient identification errors | <p>“I think one pertinent one is for lack of patient identification marks. Our Bhutanese have similar names and then that can lead to, during procedures in rush hours, doing procedures in a wrong patient” (Medical doctor).</p>                                                                                                                                                                           |

### **Factors contributing to patient safety concerns**

Human (staff) and system factors were identified as the main contributing factors to patient safety concerns (themes and supporting quotes are presented in Table 2).

#### ***Human (staff) factors***

**Lack of patient safety competency:** The most commonly cited factor contributing to patient safety concerns was healthcare professionals’ lack of patient safety competencies, encompassing lack of knowledge of patient safety principles and processes, not having the necessary skills to practice safely, and not displaying the ‘right’ attitude.

### *Knowledge*

Lack of knowledge about quality improvement and patient management processes was identified as a major contributing factor to patient safety concerns. Medication errors and HAIs were linked to healthcare professionals' lacking requisite knowledge about medicines/drugs and infection control.

### *Skills*

Healthcare professionals' lack of patient assessment skills, for example, not checking vital signs, not taking a detailed patient history, or failure to review a patient's history, were perceived as contributing to errors such as wrong patient diagnoses and treatment.

### *Attitudes*

The most prominent issue identified was a complacent attitude among healthcare professionals (e.g. taking 'shortcuts' and carelessness). Examples included healthcare professionals not applying knowledge, despite knowing about patient safety measures, and not apportioning sufficient importance to Standard Operating Protocols and guidelines.

### *System factors*

*Lack of resources:* All categories of participants reported that shortage of staff (poor skill mix and staff-patient ratio) was the key contributing factor to diagnostic and medication errors. Also perceived to contribute to patient safety concerns was the lack of infrastructure. This included: a lack of rooms to isolate patients with infectious diseases, to store clinical items (e.g., sterilised packs), and to carry out procedures without disruption and contamination; lack of basic materials and equipment for infection control such as disinfectants, soaps, and wound dressing supplies; dusty hospital surroundings; and absence of adequate systems to

1  
2  
3 monitor hospital infection rates. Diagnostic errors were believed to be related to lack of  
4  
5 adequate investigative resources (e.g., laboratory reagents) and lack of functional and reliable  
6  
7 diagnostic equipment.  
8  
9

10  
11 *Lack of policies, guidelines and protocols on patient safety:* As a consequence of the lack of  
12  
13 policies, guidelines, standard protocols and checklists, there was perceived variation in the  
14  
15 management of patients across different hospitals and/or wards, with treating specialists and  
16  
17 nurses not agreeing on treatment matters.  
18  
19

20  
21  
22 *Poor communication and collaboration:* Healthcare professionals failing to communicate  
23  
24 verbally and not clearly documenting patient care were reported to contribute to patient safety  
25  
26 concerns. For example, continuation of medications for unreasonable periods of time was  
27  
28 perceived to have resulted from poor communication between doctors and nurses. Lack of  
29  
30 clear communication with and provision of information to patients about their disease and  
31  
32 treatment was reported to lead to poor compliance with treatment.  
33  
34

35  
36  
37 Lack of teamwork and collaboration among hospital departments and clinicians were  
38  
39 perceived to be particularly problematic. Internal conflicts and ‘tribal fights’ were reported,  
40  
41 with stakeholders trying to blame and ‘pull each other’s legs’ (which in Bhutan is taken to  
42  
43 mean ‘belittling’), disrupting workplace harmony, respect and cooperation. Participants  
44  
45 described difficulty coordinating members of departments, due to lack of cooperation.  
46  
47

48  
49  
50 *Lack of management support and governance:* Some participants believed patient safety, as  
51  
52 an agenda, had been overlooked by leaders and managers. Patient safety and risk  
53  
54



management have not yet permeated into the Bhutanese healthcare system, and management was perceived as not yet ready to accept change.

*Poorly developed patient safety incident reporting:* Incident reporting processes were reportedly poorly developed. For instance, robust systems did not exist to record and report incidents and it was perceived that as a result the majority of incidents went unreported.

*Lack of patient education on patient safety:* Participants contended that patients are not educated about infection control and are not aware of how to take care of their own body secretions (sputum, urine and blood), increasing the risk of cross infection. In addition, healthcare professionals' failure to inform and educate patients and the public about certain hospital functions and procedures, such as where to go in the event of emergencies and signs and symptoms of emergencies, were perceived to have contributed to patient mortality.

**Table 2.** Factors contributing to patient safety concerns

| Themes                                                      | Participant statements                                                                                                                                                                                                                                                                                                                                                                                                             |
|-------------------------------------------------------------|------------------------------------------------------------------------------------------------------------------------------------------------------------------------------------------------------------------------------------------------------------------------------------------------------------------------------------------------------------------------------------------------------------------------------------|
| <i>Human (staff) factors</i>                                |                                                                                                                                                                                                                                                                                                                                                                                                                                    |
| Lack of patient safety competency:                          |                                                                                                                                                                                                                                                                                                                                                                                                                                    |
| <ul style="list-style-type: none"> <li>Knowledge</li> </ul> | <p>“Sometimes the medication errors usually happen because they [staff] aren’t aware of the right method to be given. For example, there are some medications like [name of drugs withheld] which are really painful and it should not be given direct bolus, but it should rather be given as infusion. [...] It so happens that they are given bolus and then we have to be facing a problem and solving it” (Nurse - NGM5).</p> |

|                                                               |                                                                                                                                                                                                                                                                                                                                                                                                                                                                                    |
|---------------------------------------------------------------|------------------------------------------------------------------------------------------------------------------------------------------------------------------------------------------------------------------------------------------------------------------------------------------------------------------------------------------------------------------------------------------------------------------------------------------------------------------------------------|
| <ul style="list-style-type: none"> <li>• Skills</li> </ul>    | <p>“One issue is - usually the patients are seen in [...] OPD [Out-patient Department] and they are sent here [to the ward]. So they [clinicians] did not monitor the vital signs and then we had some incidents. [...] [one patient] did not have vital signs monitored and did not have [Blood Pressure checked] - actually the patient was ‘walking dead’. Then we had to manage here in the ward and then ultimately send to ICU” (Ward Manager).</p>                          |
| <ul style="list-style-type: none"> <li>• Attitudes</li> </ul> | <p>“It is the attitude [of healthcare providers] sometimes” (Ward Manager).</p> <p>“If I have to say, I think certain procedures are done by people who are not very cautious about taking precautions. For example, as a medical student we knew that we have to take lots of precaution even to insert a catheter but now I see that it is being done very casually. I don’t think people are really taking care of the proper sterile techniques and all” (Medical doctor).</p> |
| <p><i>System factors</i></p>                                  |                                                                                                                                                                                                                                                                                                                                                                                                                                                                                    |
| <p>Lack of resources</p>                                      | <p>“Contribution for medication error maybe due to the shortage of nursing staff where while they are preparing the medicine, they have to go and attend the other critical cases, if any” (Senior Manager).</p> <p>“I think the most common patient safety issue is establishing diagnosis. I find it as a major issue because patients are not properly followed up and then adequate investigating facilities are</p>                                                           |

|                                                              |                                                                                                                                                                                                                                                                                                                                                                                                                                                                                                                                                                                                                                                                                                                                                                                         |
|--------------------------------------------------------------|-----------------------------------------------------------------------------------------------------------------------------------------------------------------------------------------------------------------------------------------------------------------------------------------------------------------------------------------------------------------------------------------------------------------------------------------------------------------------------------------------------------------------------------------------------------------------------------------------------------------------------------------------------------------------------------------------------------------------------------------------------------------------------------------|
|                                                              | not available and we lose patient in between” (Nurse).                                                                                                                                                                                                                                                                                                                                                                                                                                                                                                                                                                                                                                                                                                                                  |
| Lack of policies, guidelines and protocols on patient safety | “One is the standard management of patient. That depends on individual specialists and individual doctors. A major crux of the thing is how to come to a proper diagnosis and what line of treatment. So, highly qualified specialists have their own line of management which some specialists don’t agree” (Senior Manager).                                                                                                                                                                                                                                                                                                                                                                                                                                                          |
| Poor communication and collaboration                         | <p>“When I talk about the patient safety one thing is that there is a gap in between doctors and nurses because they prescribe antibiotics and it goes more than 20 to 30 days. [...] Doctors, when they prescribe the drugs in ward, most of the doctors they use [name of drugs withheld] which is a 3<sup>rd</sup> generation antibiotic and they do not write the specific days, like for this many days” (Nurse).</p> <p>“As of now we have a problem in getting all departments together to get a good care of the patient. For example, in the emergency we see lot of cases which need to be consulted with different departments – interdepartmental consultation. [...] But at the moment it is very difficult to have an interdepartmental consultation” (Ward Manager).</p> |
| Lack of management support and governance                    | “Patient safety in Bhutan, in my honest opinion, there isn’t anything happening. We have some visiting professors and we have some health volunteers, they come in and they try to suggest and our staff, one or two maybe, try to take initiatives or people who have seen other hospital they think we need to do something. But it                                                                                                                                                                                                                                                                                                                                                                                                                                                   |

|                                                    |                                                                                                                                                                                                                                                                                                                                              |
|----------------------------------------------------|----------------------------------------------------------------------------------------------------------------------------------------------------------------------------------------------------------------------------------------------------------------------------------------------------------------------------------------------|
|                                                    | is ailing, because the system is not ready to accept anything. Right now, the health system is only considered about getting drugs and how many beds we can put and how many staff we can recruit but there is no check on how safe are the patients” (Nurse).                                                                               |
| Poorly developed patient safety incident reporting | “I think that [incident reporting] is the weakest in the health system here. Keeping the data and then recording and reporting is very, very poor in the healthcare system- be it in National Referral Hospital or District Hospitals” (Medical doctor).                                                                                     |
| Lack of patient education on patient safety        | “I think in the hospital settings when we talk about safety of the patient and the factors, basically patients were not educated on infection control so thereby they are not able to take care of their own secretions like sputum or urine or even blood. So that is one factor that we are likely to have infections” (Health Assistant). |

### Strategies to improve patient safety

Participants identified six strategies to improve patient safety: instituting governance for patient safety, development/improvement of physical infrastructure/environment, providing adequate resources, providing patient safety training and education, promoting communication and information systems, and changing the attitudes and behaviour of healthcare professionals (themes and supporting quotes are provided in Table 3).

***Instituting governance for patient safety:*** Institution of patient safety governance was identified as an important strategy to improve patient safety processes and practices. Participants argued a hospital patient safety program with a committee structure (e.g., patient

1  
2  
3 safety, mortality, and clinical governance committees) reporting to the Ministry of Health  
4  
5 would advance patient safety. To reduce risk of harm to patients, participants recommended  
6  
7 implementation of robust policies, guidelines and protocols.  
8  
9

10  
11 ***Development/improvement of physical infrastructure/environment:*** Participants highlighted  
12  
13 the importance to patient safety of safe physical infrastructure and a safe environment. Safe  
14  
15 infrastructure was characterised as strong buildings with adequate ‘space’; good navigation  
16  
17 systems (e.g., signage); an inbuilt oxygen system, ramps, electric elevators, a ventilation  
18  
19 system and good natural lighting. A safe environment was characterised as promoting  
20  
21 physical safety, such as providing patients with an orientation on admission and maintaining  
22  
23 cleanliness. The provision of equipment, such as wheel chairs and beds with side rails, was  
24  
25 also deemed to be core elements of patient safety.  
26  
27

28  
29  
30  
31 ***Providing adequate resources:*** Having adequate resources – including skilled and educated  
32  
33 healthcare professionals, functional equipment and a constant supply of drugs – was  
34  
35 considered critical to patient safety. Access to reliable laboratory facilities was considered  
36  
37 necessary to facilitate correct patient diagnoses, treatment and management.  
38  
39

40  
41  
42 ***Providing patient safety training and education for healthcare professionals:*** Healthcare  
43  
44 professionals (including doctors) were perceived to have inadequate knowledge about the  
45  
46 concept and practice of patient safety. Developing clear guidelines, protocols and programs to  
47  
48 train and educate healthcare professionals about patient safety before they entered practice  
49  
50 was considered essential to improving patient safety.  
51  
52

**Promoting communication and information systems:** Promoting communication and patient safety information systems was seen as important to patient safety. For participants, patient safety could be advanced by improving teamwork and interpersonal relationships among healthcare professionals, and by instituting mechanisms to monitor patient safety.

**Changing the attitudes and behaviours of healthcare professionals:** Changing healthcare professionals' attitudes was considered critical to improving patient safety processes. Provision of education on patient safety in pre-service courses, and throughout employment, was considered essential to shaping the attitudes of and promoting respectful behaviour among healthcare professionals.

**Table 3.** Strategies to improve patient safety

| Themes                                                         | Participant statements                                                                                                                                                                                                                                                                                                                                                                                |
|----------------------------------------------------------------|-------------------------------------------------------------------------------------------------------------------------------------------------------------------------------------------------------------------------------------------------------------------------------------------------------------------------------------------------------------------------------------------------------|
| Instituting governance for patient safety                      | “One thing is to constitute committees, especially relevant committees like clinical governance committees. [...] [...] We have to have regular updates, discussions [...] Certain bodies like quality control, mortality committee and clinical governance are very important” (Medical doctor).                                                                                                     |
| Development/improvement of physical infrastructure/environment | “[...] the infrastructure should be such that it promotes smooth flow of patients. Patients should not get confused. They should not get lost in a health facility. [...] the infrastructure should be in a normal condition, for example, the air flow, the exposure to sun should be good, so that we use minimum advance technologies like heating system, cooling system [...]” (Senior Manager). |

|                                                                              |                                                                                                                                                                                                                                                                                                                                                                                                                                                                                                          |
|------------------------------------------------------------------------------|----------------------------------------------------------------------------------------------------------------------------------------------------------------------------------------------------------------------------------------------------------------------------------------------------------------------------------------------------------------------------------------------------------------------------------------------------------------------------------------------------------|
|                                                                              | <p>“[...] we need some trolleys, the oxygen and everything should be there and IV stands. We have the elevator here but it is not always working. So the patient sometimes gets locked inside the elevator. We need good electricity” (Ward Manager).</p>                                                                                                                                                                                                                                                |
| Providing adequate resources                                                 | <p>“To improve patient safety in district hospital like ours, I think the first and foremost things we should have is enough staff. We should have enough equipment” (Nurse).</p>                                                                                                                                                                                                                                                                                                                        |
| Providing patient safety training and education for healthcare professionals | <p>“I think first and foremost most of the health workers don’t have the concept of patient safety. Even doctors we are trained in different countries” (Medical doctor).</p>                                                                                                                                                                                                                                                                                                                            |
| Promoting communication and information systems                              | <p>“There should be proper communication between patient and the visitors and patient themselves, and also among healthcare workers because often a time there is a lot of miscommunication. This could ultimately pose a threat to patient safety” (Nurse).</p>                                                                                                                                                                                                                                         |
| Changing the attitudes and behaviours of healthcare professionals            | <p>“First and foremost is the notion that keeping patient safety is not the responsibility of the managers or the leaders. Every individual should take each and every service or an activity in line with patient safety. [...] Patient safety has to be on our mind all the time” (Medical doctor).</p> <p>“It is not easy to change the attitude of people but maybe through our education system or through the training centre curriculum from day one till they leave the institute might have</p> |

|  |                                                                                           |
|--|-------------------------------------------------------------------------------------------|
|  | a role in changing the attitude and providing better safety to patient” (Senior Manager). |
|--|-------------------------------------------------------------------------------------------|

## Discussion

The Bhutanese government has prioritised improving the quality of its healthcare services. However, achieving the improvements desired is proving to be difficult. A key reason for this relates to the levels of complexity involved in providing high quality services, which cannot be addressed without a well-structured dedicated program of patient safety. Arguably, one of the most striking findings of this study is the lack of a program or infrastructure for capturing quantifiable and independently verifiable data on patient safety outcomes. Despite this, the study participants identified problems and patient safety outcomes that were commensurate with those identified in other countries. The mainstream patient safety issues and contributing factors (human and system factors) identified in this study were commensurate with those found in the UK <sup>10</sup>, US <sup>11</sup>, Australia <sup>12 13</sup>, Latin America <sup>14</sup>, Thailand <sup>15</sup> and India <sup>16-18</sup>. Participants identified medication errors, HAIs, surgical errors and post-operative complications, diagnostic errors, laboratory/blood errors, fall injuries, information/communication errors and patient identification errors as key patient safety concerns in the Bhutanese healthcare system. Factors contributing to these concerns were perceived to include the system (latent failures) as well as human (staff) factors (slips, lapses and violations). Further, the strategies recommended by participants in this study are comparable to those tried and tested in other countries <sup>19-21</sup>. Participants recommended: instituting clinical governance, developing/improving physical infrastructure (including equipment), providing adequate human resources, providing patient safety education to



1  
2  
3 healthcare professionals and patients, and promoting communication and information  
4  
5 systems.  
6  
7  
8

9 In light of the findings of this study, patient safety interventions in the Bhutanese healthcare  
10 system may need to be targeted at several points in the hierarchy, starting with policy  
11 development, and extending to assessment and management of risk, and the implementation  
12 of processes for reducing the incidence and impact of preventable adverse events.  
13 Specifically, patient safety improvement efforts need to focus on organisational factors.  
14 Addressing the organisational factors identified in this study would help to improve the  
15 overall healthcare system safety culture, which is now widely recognised in the patient safety  
16 literature as being critical to reducing the incidence and impact of preventable adverse events  
17  
18  
19  
20  
21  
22  
23  
24  
25  
26 22-24  
27  
28  
29  
30

31 One of the key recommendation made by participants in this study was to institute  
32 governance for patient safety: instituting patient safety monitoring committees and  
33 developing clear patient safety guidance documents. As suggested by this finding, a highly  
34 visible and functional patient safety committee/program within Bhutan's Ministry of Health  
35 and guidance documents are needed, in conjunction with secure and adequate funding to  
36 make significant improvements in patient safety. Such a safety program needs to include  
37 clear goals for safety; defining safety and risk management systems (including developing  
38 tools for identifying and analysing adverse events, and evaluating approaches taken to solve  
39 issues). Literature suggests that the institution of patient safety committees (including the  
40 establishment of national patient safety foundations and in-hospital patient safety  
41 committees) and patient safety guidance documents are imperative to enhancing patient  
42 safety in healthcare<sup>25-27</sup>. The essential functions that patient safety committees can serve  
43  
44  
45  
46  
47  
48  
49  
50  
51  
52  
53  
54  
55  
56  
57  
58  
59  
60

1  
2  
3 include: overseeing patient safety programs, developing expertise and managing resources<sup>28-</sup>  
4  
5<sup>30</sup>. Development of clear patient safety guidance documents could improve patient safety in  
6  
7 the Bhutanese healthcare system by establishing minimum levels of performance,  
8  
9 maintaining consistency or uniformity across multiple individuals and organisations, setting  
10  
11 expectations about what is to be achieved and fostering a shared set of beliefs, attitudes and  
12  
13 norms, and prevent variation in clinical practice<sup>25 27 31-36</sup>. Most importantly, development of  
14  
15 adjunct guidance documents by the Bhutan Ministry of Health (with explicit process maps  
16  
17 and decision trees detailing what healthcare professionals should do during the course of  
18  
19 patient care) would help change the attitudes and behaviours of healthcare professionals.  
20  
21  
22  
23

24  
25 As suggested by the findings of this study, development and/or improvement of physical  
26  
27 infrastructure/environment (including equipment), providing adequate human resources,  
28  
29 providing patient safety education to healthcare professionals and patients, and promoting  
30  
31 communication and information systems, are also fundamental to improving patient safety.  
32  
33 Research suggests that there is a positive relationship between these components and patient  
34  
35 safety. For example, the lack of and/or poorly organised physical infrastructure or  
36  
37 environment can have a significant impact on patient safety – including, for example, cross  
38  
39 infection and falls<sup>20 37-42</sup>. The higher the ratio of qualified healthcare professionals to patients  
40  
41 the better the patient safety outcomes - lower rates of medication errors and wound infections  
42  
43<sup>43-50</sup>. Patient safety education and training programs have been shown to increase healthcare  
44  
45 professionals' ability to analyze and solve patient safety problems<sup>51 52</sup>. Promoting  
46  
47 communication and information systems such as information technology or decision support  
48  
49 systems such as computerised physician order entry, which are designed to assist healthcare  
50  
51 professionals in applying new information to patient care through the analysis of patient  
52  
53 specific variables, are believed to improve communication on all levels<sup>53-56</sup>. For instance,  
54  
55  
56  
57  
58  
59  
60

1  
2  
3 computerised devices like Personal Digital Assistant, which provide useful and accurate  
4 clinical practice guidelines and an alert system have been found to be more efficient than  
5 their paper-based counterparts<sup>57</sup>.  
6  
7  
8  
9

10  
11 On the basis of the findings of this study, and in keeping with the immediate priorities for  
12 national action on matters of patient safety, the cornerstone for a comprehensive strategy to  
13 improve patient safety in the Bhutanese healthcare system involves (1) a national focus on  
14 patient safety; (2) leadership, research, tools and protocols to enhance the knowledge base  
15 about safety; (3) patient safety governance; and (4) patient safety education and training. In  
16 addition, based on the findings of the study, development of a program to address specific  
17 patient safety issues is recommended. This includes addressing medication safety, HAIs,  
18 surgical errors, diagnostic errors, laboratory/blood products, identification errors, falls  
19 injuries, and information and communication errors (including verbal abuse).  
20  
21  
22  
23  
24  
25  
26  
27  
28  
29  
30  
31  
32

### 33 **Strengths and limitations**

34  
35 A key strength of this study is the contribution it makes to a deeper awareness and  
36 understanding of the patient safety issues and concerns in the cultural context of Bhutan.  
37 Analysis of the data revealed the issues and concerns identified were commensurate with  
38 those experienced in other resource poor countries including the challenges of successfully  
39 addressing them. The main limitation of the study reported here is its reliance on patient  
40 safety concepts, theories and practices that have been developed and applied in high-income  
41 resource-rich nations. This, however, is also a strength of the study, since one of its aims was  
42 to explore the 'fit' or otherwise of such a frame in under-resourced and data-poor nations, and  
43 to make meaningful comparisons. On the basis of the comparisons made, establishing a  
44 foundation for informing a locally adapted program to address patient safety problems/issues  
45  
46  
47  
48  
49  
50  
51  
52  
53  
54  
55  
56  
57  
58  
59  
60

1  
2  
3 identified in Bhutan has been rendered possible. A second limitation of the study relates to  
4  
5 the large amount of data generated. As previously reported [author blinded], decisions about  
6  
7 inclusion and exclusion of data were informed by the consistency of findings across the  
8  
9 disparate participant groups and the themes and/or issues that were pertinent to informing the  
10  
11 patient safety concerns in the healthcare context of Bhutan. In this process it is possible that  
12  
13 some material may have been lost.  
14  
15

## 16 17 18 **Conclusion**

19  
20 This study pioneers the exploration of patient safety issues and concerns in Bhutan's  
21  
22 healthcare system. The study has identified medication errors, HAIs, surgical errors and post-  
23  
24 operative complications, diagnostic errors, laboratory/blood errors, fall injuries,  
25  
26 communication errors and patient identification errors as key patient safety concerns. Factors  
27  
28 contributing to these concerns were identified to include system as well as human factors.  
29  
30 The strategies recommended by participants indicate that a system to mitigate risks caused by  
31  
32 both human and system factors is required to improve patient safety in Bhutan's healthcare  
33  
34 system.  
35  
36  
37  
38

39  
40 Overall, this study has provided a basis upon which future research and patient safety  
41  
42 improvement strategies can be identified and developed. An immediate strategy, based on the  
43  
44 findings of this study, would be to conceptualise and position patient safety as a priority for  
45  
46 Bhutan's healthcare system and its leaders. Interventions need to target several points in the  
47  
48 hierarchy, starting from policy development and extending to assessment and management of  
49  
50 risk, and to reducing the incidence and impact of disruptive behaviours. Additionally, the  
51  
52 provision of patient safety training and education for healthcare professionals and patients is  
53  
54 required. These strategies would help improve overall safety by preventing adverse events.  
55  
56  
57  
58

**Acknowledgement**

The authors sincerely thank Dr Megan-Jane Johnstone for her helpful comments on this article and for her support for this research.

**Conflict of interest**

The authors declare that there is no conflict of interest

**Funding:** The author(s) received no financial support for the research, authorship, and/or publication of this article.

**Authors' contribution:**

The first author conceived the study. Both authors designed the study and developed the study protocol. RP collected and analysed the data. The second author supervised data collection and data analysis. Both authors prepared and approved this paper.

## References

1. Donaldson L. Championing patient safety: going global. *Qual Saf Health Care* 2002;11:112. doi: 10.1136/qhc.11.2.112 [published Online First: Jun]
2. World Health Organization. Final technical report for the conceptual framework for the international classification for patient safety, version 1.1. WHO, Geneva: Chapter: The international classification for patient safety key concepts and preferred terms. 2009a. [http://www.who.int/patientsafety/taxonomy/icps\\_full\\_report.pdf](http://www.who.int/patientsafety/taxonomy/icps_full_report.pdf) (accessed 1 March 2012).
3. World Health Organization. Patient safety research. 2012. <http://www.who.int/patientsafety/research/en/> (accessed 15 April 2012).
4. World Health Organization. Global priorities for patient safety research: better knowledge for safer care. 2009b. [http://whqlibdoc.who.int/publications/2009/9789241\\_eng.pdf](http://whqlibdoc.who.int/publications/2009/9789241_eng.pdf) (accessed 20 May, 2016).
5. Jha AK, Prasopa-Plaizier N, Larizgoitia I, et al. Patient safety research: an overview of the global evidence. *Qual Saf Health Care* 2010;19:42-47. doi: 10.1136/qshc.2008.029165
6. Yoelao D, Mohan KP, Hamid HSA. A Review of Patient Safety in Thailand and Malaysia. *Int J Behav Sci* 2014;9:53-70.
7. Siddiqi S, Elasadly R, Khorshid I, et al. Patient safety friendly hospital initiative: from evidence to action in seven developing country hospitals. *Int J Qual Health Care* 2012;24:144-51. doi: 10.1093/intqhc/mzr090
8. Hernandez K, Ramos E, Seas C, et al. Incidence of and risk factors for surgical-site infections in a Peruvian hospital. *Infect Control Hosp Epidemiol* 2005;26:473-77. doi: 10.1086/502570
9. Smith J, Firth J. Qualitative data analysis: the framework approach. *Nurse Res* 2011;18:52-62. doi: 10.7748/nr2011.01.18.2.52.c8284

- 1  
2  
3 10. Healey F, Scobie S, Oliver D, et al. Falls in English and Welsh hospitals: a national  
4  
5 observational study based on retrospective analysis of 12 months of patient safety incident  
6  
7 reports. *Qual Saf Health Care* 2008;17:424-30. doi: 10.1136/qshc.2007.024695  
8  
9 11. Linden JV, Wagner K, Voytovich AE, et al. Transfusion errors in New York State: an  
10  
11 analysis of 10 years' experience. *Transfusion* 2000;40:1207-13. doi: 10.1046/j.1537-  
12  
13 2995.2000.40101207.x  
14  
15 12. Kable AK, Gibberd RW, Spigelman AD. Adverse events in surgical patients in Australia.  
16  
17 *Int J Qual Health Care* 2002;14:269-76. doi: 10.1093/intqhc/14.4.269  
18  
19 13. Nichols P, Copeland T, Craib IA, et al. Learning from error: identifying contributory  
20  
21 causes of medication errors in an Australian hospital. *Med J Aust* 2008;188:276-79.  
22  
23 14. Aranaz-Andres JM, Aibar-Rejon C, Limon-Ramirez R, et al. Prevalence of adverse  
24  
25 events in the hospitals of five Latin American countries: results of the 'Iberoamerican study  
26  
27 of adverse events' (IBEAS). *BMJ Qual Saf* 2012;20:1043-51. doi:  
28  
29 10.1136/bmjqs.2011.051284  
30  
31 15. Asavaroengchai S, Sriratanaban J, Hiransuthikul N, et al. Identifying adverse events in  
32  
33 hospitalized patients using global trigger tool in Thailand. *Asian Biomed* 2009;3:545-50. doi:  
34  
35 10.5372%2F1159  
36  
37 16. Datta P, Rani H, Chauhan R, et al. Health-care-associated infections: Risk factors and  
38  
39 epidemiology from an intensive care unit in Northern India. *Indian J Anaesth* 2014;58:30-35.  
40  
41 doi: 10.4103/0019-5049.126785  
42  
43 17. Harrison R, Cohen AW, Walton M. Patient safety and quality of care in developing  
44  
45 countries in Southeast Asia: a systematic literature review. *Int J Qual Health Care*  
46  
47 2015;27:240-54. doi: 10.1093/intqhc/mzv041  
48  
49 18. Kumar S, Chaudhary S. Medical errors and consequent adverse events in critically ill  
50  
51 surgical patients in a tertiary care teaching hospital in Delhi. *J Emerg Trauma Shock*  
52  
53  
54  
55  
56  
57  
58  
59  
60

2009;2:80-84. doi: 10.4103/0974-2700.50740

19. Elkin PL, Gorman PN. Continuing medical education and patient safety: an agenda for lifelong learning. *J Am Med Inform Assoc* 2002;9:S128-S32. doi: 10.1197/jamia.M1244

20. Hignett S, Lu J. Space to care and treat safely in acute hospitals: recommendations from 1866 to 2008. *Appl Ergon* 2010;41:666-73. doi: 10.1016/j.apergo.2009.12.010

21. Reiling J, Breckbill C, Murphy M, et al. Facility Designing Around Patient Safety and its Effect on Nursing. *Nurs Econ* 2003;21:143-47.

22. Morello RT, Lowthian JA, Barker AL, et al. Strategies for improving patient safety culture in hospitals: a systematic review. *BMJ Qual Saf* 2013;22:11-18. doi: 10.1136/bmjqs-2011-000582

23. Vogus TJ, Weick KE, Sutcliffe KM. Doing No Harm: Enabling, Enacting, and Elaborating a Culture of Safety in Health Care. *Acad Manag Perspect* 2010;24:60-77. doi: 10.5465/AMP.2010.24.4.3652485.a

24. Zaheer S, Ginsburg L, Chuang YT, et al. Patient safety climate (PSC) perceptions of frontline staff in acute care hospitals: examining the role of ease of reporting, unit norms of openness, and participative leadership. *Health Care Manage Rev* 2015;40:13-23. doi: 10.1097/HMR.0000000000000005

25. Kohn LT, Corrigan JM, Donaldson MS. To err is human: Building a safer health system. Washington D.C.: National Academy Press 2000.

26. Clinical Excellence Commission. Patient safety research: A review of the technical literature The centre for Clinical Research, University of New South Wales, Sydney Donald Hindle, Jeffrey Braithwaite and Rick Ledema 2005.

27. Adibi H, Khalesi N, Ravaghi H, et al. Development of an effective risk management system in a teaching hospital. *Journal Diabetes Metab Disord* 2012;11:15. doi: 10.1186/2251-6581-11-15



- 1  
2  
3 28. Boddington R, Arthur H, Cummings D, et al. Team Resource Management and patient  
4 safety: A team focused approach to clinical governance. *Clin Govern Int J* 2006;11:58 -  
5  
6 68. doi: 10.1108/14777270610647038  
7  
8  
9 29. Sage WM, Gallagher TH, Armstrong S, et al. How policy makers can smooth the way for  
10 communication-and-resolution programs. *Health Aff* 2014;33:11-19. doi:  
11  
12 10.1377/hlthaff.2013.0930  
13  
14  
15 30. Scott I. What are the most effective strategies for improving quality and safety of health  
16 care? *Intern Med J* 2009;39:389-400. doi: 10.1111/j.1445-5994.2008.01798.x  
17  
18  
19 31. Szymanska M, Ryan CA, Murphy BP. Introducing random safety audits (RSA) in a  
20 neonatal intensive care unit (NICU). *Ir Med J* 2011;104:114-17.  
21  
22  
23 32. Ursprung R, Gray JE, Edwards WH, et al. Real time patient safety audits: improving  
24 safety every day. *Qual Saf Health Care* 2005;14:284-89. doi: 10.1136/qshc.2004.012542  
25  
26  
27 33. McDonald R, Waring J, Harrison S, et al. Rules and guidelines in clinical practice: a  
28 qualitative study in operating theatres of doctors' and nurses' views. *Qual Saf Health Care*  
29 2005;14:290-94. doi: 10.1136/qshc.2005.013912  
30  
31  
32 34. Classen DC, Kilbridge PM. The roles and responsibility of physicians to improve patient  
33 safety within health care delivery system. *Acad Med* 2002;77:963-72.  
34  
35  
36 35. Institute of Medicine. Crossing the Quality Chasm: A New Health System for the 21st  
37 Century. Washington, D.C: National Academies Press 2001.  
38  
39  
40 36. Nolan TW. System changes to improve patient safety. *BMJ* 2000;320:771-73. doi:  
41  
42 10.1136/bmj.320.7237.771  
43  
44  
45 37. Flynn EA, Barker KN, Gibson JT, et al. Relationships between ambient sounds and the  
46 accuracy of pharmacists' prescription-filling performance. *Hum Factors* 1996;38:614-22. doi:  
47  
48 10.1518/001872096778827314  
49  
50  
51  
52  
53  
54  
55  
56  
57  
58  
59  
60

- 1  
2  
3 38. Mahmood A, Chaudhury H, Valente M. Nurses' perceptions of how physical environment  
4 affects medication errors in acute care settings. *Appl Nurs Res* 2011;24:229-37. doi:  
5 10.1016/j.apnr.2009.08.005  
6  
7  
8  
9 39. Muto CA, Jernigan JA, Ostrowsky BE, et al. SHEA guideline for preventing nosocomial  
10 transmission of multidrug-resistant strains of Staphylococcus aureus and enterococcus. *Infect*  
11 *Control Hosp Epidemiol* 2003;24:362-86. doi: 10.1086/502213  
12  
13  
14  
15 40. Reiling J, Knutzen BL, Wallen TK, et al. Enhancing the traditional hospital design  
16 process: a focus on patient safety. *Jt Comm J Qual Saf* 2004;30:115-24.  
17 doi: 10.1016/S1549-3741(04)30013-4  
18  
19  
20  
21 41. Rubin HR. Status report--an investigation to determine whether the built environment  
22 affects patients' medical outcomes. *J Healthc Des* 1998;10:11-13.  
23  
24  
25  
26 42. Walsh-Sukys M, Reitenbach A, Hudson-Barr D, et al. Reducing light and sound in the  
27 neonatal intensive care unit: an evaluation of patient safety, staff satisfaction and costs. *J*  
28 *Perinatol* 2001;21:230-35. doi: 10.1038/sj.jp.7200534  
29  
30  
31  
32 43. Archibald LK, Manning ML, Bell LM, et al. Patient density, nurse-to-patient ratio and  
33 nosocomial infection risk in a pediatric cardiac intensive care unit. *Pediatr Infect Dis J*  
34 1997;16:1045-48. doi: 10.1097/00006454-199711000-00008  
35  
36  
37  
38 44. Hugonnet S, Chevrolet JC, Pittet D. The effect of workload on infection risk in critically  
39 ill patients. *Crit Care Med* 2007;35:76-81. doi: 10.1097/01.CCM.0000251125.08629.3F  
40  
41  
42  
43 45. Lichtig LK, Knauf RA, Milholland DK. Some impacts of nursing on acute care hospital  
44 outcomes. *J Nur Adm* 1999;29:25-33. doi: 10.1097/00005110-199902000-00008  
45  
46  
47  
48 46. Nantsupawat A, Nantsupawat R, Kulnaviktikul W, et al. Relationship between nurse  
49 staffing levels and nurse outcomes in community hospitals, Thailand. *Nurs Health Sci* 2014  
50 doi: 10.1111/nhs.12140 [published Online First: April 4]  
51  
52  
53  
54  
55  
56  
57  
58  
59  
60

- 1  
2  
3 47. Needleman J, Buerhaus P, Mattke S, et al. Nurse-staffing levels and the quality of care in  
4 hospitals. *N Engl J Med* 2002;346:1715-22. doi: 10.1056/NEJMsa012247  
5  
6  
7 48. Robertson RH, Hassan M. Staffing intensity, skill mix and mortality outcomes: the case  
8 of chronic obstructive lung disease. *Health Serv Manage Res* 1999;12:258-68. doi:  
9  
10 10.1177/095148489901200407  
11  
12  
13 49. Stegenga J, Bell E, Matlow A. The role of nurse understaffing in nosocomial viral  
14 gastrointestinal infections on a general pediatrics ward. *Infect Control Hosp Epidemiol*  
15 2002;23:133-36. doi: 10.1086/502022  
16  
17  
18 50. McGillis HL, Doran D, Pink GH. Nurse staffing models, nursing hours, and patient safety  
19 outcomes. *J Nurs Adm* 2004;34:41-45. doi: 10.1097/00005110-200401000-00009  
20  
21  
22 51. Patey R, Flin R, Cuthbertson BH, et al. Patient safety: helping medical students  
23 understand error in healthcare. *Qual Saf Health Care* 2007;16:256-59. doi:  
24  
25 10.1136/qshc.2006.021014  
26  
27  
28 52. Chopra V, Gesink BJ, de Jong J, et al. Does training on an anaesthesia simulator lead to  
29 improvement in performance? *Br J Anaesth* 1994;73:293-97. doi: 10.1093/bja/73.3.293  
30  
31  
32 53. Koppel R, Metlay JP, Cohen A, et al. Role of computerized physician order entry systems  
33 in facilitating medication errors. *JAMA* 2005;293:1197-203. doi: 10.1001/jama.293.10.1197  
34  
35  
36 54. Bates DW, Kuperman G, Teich JM. Computerized physician order entry and quality of  
37 care. *Qual Manag Health Care* 1994;2:18-27. doi: 10.1097/00019514-199402040-00005  
38  
39  
40 55. Bates DW, Spell N, Cullen DJ, et al. The costs of adverse drug events in hospitalized  
41 patients. Adverse Drug Events Prevention Study Group. *JAMA* 1997;277:307-11. doi:  
42  
43 10.1001/jama.1997.03540280045032  
44  
45  
46 56. Wong J, Beglaryan H. Strategies for hospitals to improve patient safety: A review of the  
47 research. 2004. <http://www.psnet.ahrq.gov/resource.aspx?resourceID=1341> (accessed 6  
48  
49 August 2014).  
50  
51  
52  
53  
54  
55  
56  
57  
58  
59  
60

1  
2  
3 57. VanDenKerkhof EG, Goldstein DH, Lane J, et al. Using a personal digital assistant  
4 enhances gathering of patient data on an acute pain management service: a pilot study. *Can J*  
5 *Anaesth* 2003;50:368-75. doi: 10.1007/BF03021034  
6  
7

8  
9 58. Andermann A, Ginsburg L, Norton P, et al. Core competencies for patient safety  
10 research: a cornerstone for global capacity strengthening. *BMJ Qual Saf* 2011;20:96-101. doi:  
11 10.1136/bmjqs.2010.041814  
12  
13  
14  
15

16  
17  
18  
19  
20  
21  
22  
23  
24  
25  
26  
27  
28  
29  
30  
31  
32  
33  
34  
35  
36  
37  
38  
39  
40  
41  
42  
43  
44  
45  
46  
47  
48  
49  
50  
51  
52  
53  
54  
55  
56  
57  
58  
59  
60

For peer review only

# BMJ Open

## Patient safety issues and concerns in Bhutan's healthcare system: a qualitative exploratory descriptive study

|                                 |                                                                                                                                                                                                                            |
|---------------------------------|----------------------------------------------------------------------------------------------------------------------------------------------------------------------------------------------------------------------------|
| Journal:                        | <i>BMJ Open</i>                                                                                                                                                                                                            |
| Manuscript ID                   | bmjopen-2018-022788.R1                                                                                                                                                                                                     |
| Article Type:                   | Research                                                                                                                                                                                                                   |
| Date Submitted by the Author:   | 18-May-2018                                                                                                                                                                                                                |
| Complete List of Authors:       | Pelzang, Rinchen; Deakin University, School of Nursing and Midwifery<br>Hutchinson, Alison; Deakin University School of Nursing and Midwifery,<br>School of Nursing and Midwifery                                          |
| <b>Primary Subject Heading</b>: | Qualitative research                                                                                                                                                                                                       |
| Secondary Subject Heading:      | Health policy, Health services research                                                                                                                                                                                    |
| Keywords:                       | Clinical governance < HEALTH SERVICES ADMINISTRATION & MANAGEMENT, Health policy < HEALTH SERVICES ADMINISTRATION & MANAGEMENT, Quality in health care < HEALTH SERVICES ADMINISTRATION & MANAGEMENT, QUALITATIVE RESEARCH |
|                                 |                                                                                                                                                                                                                            |

SCHOLARONE™  
Manuscripts

1  
2  
3 **Title of the Manuscript:** Patient safety issues and concerns in Bhutan's healthcare system: a  
4 qualitative exploratory descriptive study  
5  
6  
7

8  
9 **Corresponding author's address:**

10 Dr Rinchen Pelzang

11 Higher Degree by Research Unit

12 School of Nursing and Midwifery

13 Deakin University

14 221 Burwood Highway

15 Melbourne VIC 3125

16 AUSTRALIA

17 E-mail: [rpelzang1970@gmail.com](mailto:rpelzang1970@gmail.com)

18 Phone number: +61 0457780018

19 Fax: +61 3 9627 4877  
20  
21  
22  
23  
24  
25  
26  
27  
28  
29  
30  
31  
32  
33  
34

35 **Authors:**

36 Dr Rinchen Pelzang\* [*Doctor of Philosophy (PhD), Master of Nursing Science (MNS),*  
37 *Postgraduate Diploma in Nursing Science – Clinical Education (PGDipNS-ClinEd),*  
38 *Bachelor of Nursing (BN), Diploma in Psychiatric Nursing (DPN), Diploma in General*  
39 *Nursing and Midwife (DGNM), Registered Nurse (RN)]*

40 Deakin University (School of Nursing and Midwifery)

41 75 Pigdons Rd

42 Geelong VIC 3216

43 AUSTRALIA  
44  
45  
46  
47  
48  
49  
50  
51  
52  
53  
54  
55  
56  
57  
58  
59  
60

1  
2  
3 Professor Alison M. Hutchinson [*Doctor of Philosophy (PhD), Master of Bioethics*  
4 (*MBioethics*), *Certificate in Midwifery (Cert Midwifery)*, *Bachelor of Applied Science –*  
5 *Advanced Nursing (BAppSci -Adv Nsg), Registered Nurse (RN)*]  
6  
7

8  
9 Deakin University (Centre for Quality and Patient Safety Research, School of Nursing and  
10  
11 Midwifery); Monash Health  
12

13  
14 75 Pigdons Rd

15  
16 Geelong VIC 3216

17  
18 AUSTRALIA  
19  
20

21  
22 **\*Corresponding author**  
23  
24

25  
26 **Keywords:** Bhutan, patient safety, clinical governance, medical errors, quality assurance  
27  
28

29  
30  
31 **Running title:** Patient safety issues and concerns in Bhutan  
32  
33

34  
35 **Total word counts:** *Abstract – 205*  
36

37  
38 *Text – 6980*  
39  
40

41  
42 **Ethical approval:** Ethical approvals were obtained from the Research Ethics Board of Health,  
43  
44 Ministry of Health, Bhutan (REBH/Approval/2012/018) and the Deakin University Human Research  
45  
46 Ethics Committee (DUHREC 2012-221) – *copies of approval letters can be provided on request.*  
47  
48  
49  
50  
51  
52  
53  
54  
55  
56  
57  
58  
59  
60

1  
2  
3 **Patient safety issues and concerns in Bhutan's healthcare system: a qualitative**  
4 **exploratory descriptive study**  
5  
6  
7

8  
9 **Abstract**

10  
11 **Objectives:** To investigate what healthcare professionals perceived and experienced as key  
12 patient safety concerns in Bhutan's healthcare system.  
13

14  
15 **Design:** Qualitative exploratory descriptive inquiry.  
16

17  
18 **Settings:** Three different levels of hospitals, a training institute and the Ministry of Health,  
19 Bhutan.  
20

21  
22 **Participants:** In total, 140 healthcare professionals and managers.  
23

24  
25 **Methods:** Narrative data were collected via conversational in-depth interviews and Nominal  
26 Group Meetings. All data were subsequently analyzed using thematic analysis strategies.  
27

28  
29 **Results:** The data revealed that medication errors, healthcare associated infections, diagnostic  
30 errors, surgical errors and post-operative complications, laboratory/blood testing errors, falls,  
31 patient identification and communication errors, were perceived as common patient safety  
32 concerns. Human and system factors were identified as contributing to these concerns.  
33  
34 Instituting clinical governance, developing and improving the physical infrastructure of  
35 hospitals, providing necessary human resources, ensuring staff receive patient safety  
36 education, and promoting 'good' communication and information systems were, in turn, all  
37 identified as processes and strategies critical to improving patient safety in the Bhutanese  
38 healthcare system.  
39

40  
41 **Conclusion:** Patient safety concerns described by participants in this study were  
42 commensurate with those identified in other low and middle-income countries. In order to  
43 redress these concerns, the findings of this study suggest that in the Bhutanese context patient  
44 safety needs to be conceptualised and prioritised.  
45  
46  
47



## Key words

Bhutan, patient safety, clinical governance, medical errors, quality assurance

## Strengths and limitations of this study (summary)

- Creating a deeper awareness and understanding of the patient safety issues and concerns in the cultural context of Bhutan is the key strength of this study.
- The reliance on patient safety concepts, theories and practices that have been developed and applied in high-income resource-rich nations is the main limitation of this study.
- The large quantity of data generated required decisions about inclusion and exclusion of data, informed by consistency of the findings across the disparate participant groups, which may have resulted in the loss of some material.

## Introduction

The World Health Organisation (WHO) has recognised patient safety as a global problem and positioned it as a worldwide endeavor, seeking to bring benefits to patients in countries rich and poor, developed and developing alike.<sup>1</sup> It is estimated that each year millions of patients worldwide suffer disabilities, injuries or death due to unsafe medical care, and that around 50% of these harmful outcomes are preventable.<sup>2 3</sup> The incidence and impact of preventable harmful events are particularly burdensome in developing and transitional-income countries.<sup>2</sup>

3

Despite patient safety being positioned by WHO as a global priority, improving patient safety outcomes in resource poor nations is challenging. One reason for this is a lack of reliable data to quantify the burden of unsafe patient care and, in turn, inform patient safety improvement

1  
2  
3 initiatives.<sup>4</sup> Another reason is that most current data on patient safety come from developed  
4 or high-income countries, where the healthcare contexts are different and where processes for  
5 improving patient safety outcomes cannot be readily transferred to other (less resourced)  
6 countries and their local healthcare settings.<sup>5 6</sup> Even so, it is estimated that rates of adverse  
7 events in low-income countries are higher than those of high-income countries. For example,  
8 the risk of healthcare associated infections in low-income countries is estimated to be 20  
9 times higher than in high-income countries.<sup>7</sup> Similarly, research evidence suggests the  
10 prevalence of preventable surgical adverse event rates in low-income countries is five times  
11 more than in high-income countries.<sup>8</sup>

12  
13  
14  
15  
16  
17  
18  
19  
20  
21  
22  
23  
24 Most adverse events have been found to be associated with human (staff) factors and system  
25 (organisational) factors.<sup>9-11</sup> Human (staff) factors include slips, lapses, violations and  
26 mistakes made by healthcare professionals (such as nurse, physicians, surgeons, pharmacists,  
27 anaesthetists) due to aberrant mental processes such as inattention, forgetfulness,  
28 carelessness, negligence, recklessness, poor motivation and lack of competency (knowledge,  
29 skills and attitude).<sup>12-17</sup> In medical and nursing literature, competency is classified according  
30 to knowledge, skills and attitudes.<sup>17-22</sup> Knowledge relates to healthcare professionals' ability  
31 to recognise and understand the potential patient safety features and/or strategies (i.e.,  
32 correctly prescribing medication - right drug, for the right reasons). Skills relate to healthcare  
33 professionals' ability to perform clinical tasks correctly to reduce risk of harm to patients  
34 (i.e., the correct preparation and administration of injections, the prevention of cross  
35 infection, accurately checking vital signs, and taking a full patient history). Finally, attitudes  
36 relate to healthcare professionals' ability to value the patient safety prevention strategies and  
37 follow them (i.e., value own role in preventing errors by following standard protocols).  
38  
39  
40  
41  
42  
43  
44  
45  
46  
47  
48  
49  
50  
51  
52  
53  
54  
55  
56  
57  
58  
59  
60  
System (organisational) factors relate to the conditions under which individuals work and can

1  
2  
3 be used to build defences to avert errors or mitigate their effects.<sup>13</sup> System (organisational)  
4 factors include effective patient safety and clinical governance, financial resources,  
5 educational system and hospital design.  
6  
7  
8  
9

10  
11 In Bhutan, patient safety issues and concerns are not well documented or known. To date  
12 there have been no published studies scoping either the nature or impact of patient safety  
13 concerns in Bhutan's healthcare system. Thus, at this time, as noted in the WHO *Global*  
14 *priorities for patient safety research*,<sup>4</sup> the main option for informing strategies aimed at  
15 improving patient safety in Bhutan is to scope stakeholders' perceptions and personal  
16 experiences of patient safety processes. It is anticipated that by undertaking preliminary  
17 scoping work a better understanding can be gained of the nature and extent of patient safety  
18 concerns in the Bhutanese context and what is required to redress these.  
19  
20  
21  
22  
23  
24  
25  
26  
27  
28  
29  
30

31 The aim of this study was to scope and describe what stakeholders (clinicians, health service  
32 managers, educators and policy makers) perceived and personally experienced as being the  
33 most common patient safety concerns in the Bhutanese healthcare system. The three research  
34 questions guiding the study were:  
35  
36  
37  
38  
39  
40

- 41 • What are healthcare professionals' and managers' knowledge, perceptions,  
42 understanding, and experiences of patient safety in Bhutan's hospitals?  
43
- 44 • What factors do healthcare professionals and managers identify as most contributing  
45 to patient safety concerns in Bhutan's hospitals?  
46
- 47 • What strategies do healthcare professionals and managers suggest are needed in order  
48 to address the patient safety issues and concerns they identified?  
49  
50  
51  
52  
53  
54  
55  
56  
57  
58  
59  
60

## Methods

### *Study design*

This study was undertaken as a naturalistic inquiry using a Qualitative Exploratory Descriptive (QED) research approach. The QED research approach assists researchers to gain an understanding of the real world context as it is experienced by the participants – i.e., what is working and what is not working.<sup>23</sup> The approach enables the researcher to obtain a detailed account of the problem of concern and capture meaningful characteristics related to real life events.<sup>24</sup> Most importantly, QED research is appropriate in situations where the problem is not known or the problem is too complex to be captured by other methods (e.g., questionnaire survey).<sup>23</sup> QED research is considered to be a highly pragmatic approach that enables the answering of concrete and practical ‘what’ kinds of question,<sup>23 25</sup> such as those addressed in this study.

### *Settings and participants*

The study was conducted in 2013 in three levels of hospital (district, regional referral and national referral), a training institute and the Ministry of Health in Bhutan<sup>26</sup>. A sample of 94 participants (doctors, nurses, ward managers, senior managers and health assistants) was purposively recruited and interviewed. Additionally, 46 healthcare professionals participated in Nominal Group Meetings (NGMs) (Table 1).

**Table 1.** Demographic characteristics of participants

| <i>Participant group</i>        |       | <i>Characteristic</i>                    |                                          |                          |
|---------------------------------|-------|------------------------------------------|------------------------------------------|--------------------------|
| In-depth interview participants |       | <b><i>Gender</i></b>                     | <b><i>N (%)</i></b>                      |                          |
|                                 |       | Male                                     | 56 (59.6%)                               |                          |
|                                 |       | Female                                   | 38 (40.4%)                               |                          |
|                                 |       | <b><i>Age</i></b>                        | <b><i>Years</i></b>                      | <b><i>Mean (yrs)</i></b> |
|                                 |       | Minimum                                  | 23                                       | 36.7                     |
|                                 |       | Maximum                                  | 60                                       |                          |
|                                 |       | <b><i>Professional qualification</i></b> | <b><i>N (%)</i></b>                      |                          |
|                                 |       | Certificate                              | 6 (6%)                                   |                          |
|                                 |       | Diploma                                  | 33 (35%)                                 |                          |
|                                 |       | Bachelor                                 | 23 (25%)                                 |                          |
|                                 |       | Master                                   | 32 (34%)                                 |                          |
|                                 |       | <b><i>Length of service</i></b>          | <b><i>Years</i></b>                      | <b><i>Mean (yrs)</i></b> |
|                                 |       | Minimum                                  | 0.5                                      | 12.7                     |
|                                 |       | Maximum                                  | 29                                       |                          |
| Nominal                         | Group | Meeting                                  |                                          |                          |
| participants                    |       |                                          | <b><i>Gender</i></b>                     | <b><i>N (%)</i></b>      |
|                                 |       |                                          | Male                                     | 24 (52%)                 |
|                                 |       |                                          | Female                                   | 22 (47.8%)               |
|                                 |       |                                          | <b><i>Age</i></b>                        | <b><i>Years</i></b>      |
|                                 |       |                                          | Minimum                                  | 24                       |
|                                 |       |                                          | Maximum                                  | 50                       |
|                                 |       |                                          | <b><i>Professional qualification</i></b> | <b><i>N (%)</i></b>      |
|                                 |       |                                          | Certificate                              | 2 (4.34%)                |
|                                 |       |                                          | Diploma                                  | 26 (56.5%)               |
|                                 |       |                                          | Bachelor                                 | 9 (19.6%)                |
|                                 |       |                                          | Master                                   | 9 (19.6%)                |
|                                 |       |                                          | <b><i>Length of service</i></b>          | <b><i>Years</i></b>      |
|                                 |       |                                          | Minimum                                  | 0.5                      |
|                                 |       |                                          | Maximum                                  | 22                       |

### ***Patient and public involvement***

As the aim of this study was to scope and describe what healthcare professionals perceived and personally experienced as being the most common patient safety concerns in the Bhutanese healthcare system no patients were involved in this study.

### ***Data collection procedure***

Data were collected via in-depth interviews (n=94) and NGMs (n=5). Participants for in-depth interviews were invited through direct contact, flyers posted on staff noticeboards and invitation letters sent to participating wards/institutes. They were interviewed individually using broad semi-structured interview questions to elicit knowledge, perceptions, and experiences of patient safety in Bhutan. Participants for NGMs were nominated by their managers and the NGMs were conducted in different groups according to criterion based characteristics such as doctors, nurses and managers. To facilitate smooth NGMs, a nominal group task statement form, which specified the exploratory questions, was used to list the critical elements of the patient safety issues. Duration of individual interviews and NGMs ranged from 45 to 120 minutes.

Approval was received from the Research Ethics Board of Health, Ministry of Health, Bhutan (REBH/Approval/2012/018) and organisational consent was obtained from the five research sites from which participants were recruited and other materials were retrieved. Ethics approval was also obtained from the Human Research Ethics Committee of Deakin University. All participants were informed about the nature and purpose of the study and provided verbal or written consent prior to interview or participation in a NGM.

### ***Data analysis***

Narrative data obtained from interviews and NGMs were analysed using the following steps: verbatim transcription of audio-recordings, active reading of transcripts, making notes on general themes, re-reading transcripts, comparing transcripts with key themes and concepts, making categories describing all aspects of the content, excluding unusable content or fillers, re-reading transcripts alongside the finally agreed list of categories, and making adjustments as necessary<sup>27</sup>. The data collected and analysed are reported and discussed in aggregate in this article - no additional data is available.

### **Results**

This study revealed eight major patient safety concerns, possible factors contributing to them, and recommendations for strategies which could be used for addressing the concerns identified. The results are presented according to these areas.

#### **Patient safety issues and concerns**

Participants identified the following patient safety issues: medication/drug errors, healthcare associated infections, surgical errors and post-operative complications, diagnostic errors, laboratory/testing errors, injurious falls, communication errors, and patient identification errors (themes and supporting quotes are provided in Table 2).

*Medication/drug errors:* Medication error was the most common patient safety concern identified. Errors included administering wrong drugs to the wrong patient, administering drugs that had passed their expiry date, giving the wrong drug dose, continuation of drugs for unjustified periods of time, and drug omissions (failure to administer prescribed drugs).

‘Irrational’ use of drugs was also described, manifested as prescribing of: large quantities of

1  
2  
3 drugs; high drug doses that could not be justified or were outside recommended doses; and  
4  
5 antibiotics to treat non-bacterial infections or viral conditions.  
6  
7

8  
9 *Healthcare Associated Infections (HAIs):* Post-surgery wound infections and urinary tract  
10  
11 infections (due to healthcare professionals not adhering to sterile technique during  
12  
13 catheterisation) were the two main HAIs identified.  
14  
15

16  
17  
18 *Surgical errors and post-operative complications:* Notable among the surgical-related patient  
19  
20 safety concerns were retention of foreign objects (e.g., gauze or instruments). In some  
21  
22 instances, surgical errors resulted in mortality.  
23  
24

25  
26  
27 *Diagnostic errors:* Errors in diagnosis were perceived as common (e.g., wrongly diagnosing  
28  
29 a patient as having tuberculosis, when they had cancer, and vice versa).  
30  
31

32  
33 *Laboratory/blood testing errors:* Incompatible blood transfusion errors were reported.  
34  
35 Common laboratory/blood testing errors included performing wrong or unnecessary blood  
36  
37 investigations, and issuing wrong laboratory reports.  
38  
39

40  
41  
42 *Fall injuries:* This involves patients falling from beds and trolleys.  
43  
44

45  
46  
47 *Communication errors:* Communication errors, verbal abuse and/or rude behavior towards  
48  
49 patients, and failure to communicate clearly to patients about their disease and treatment were  
50  
51 identified.  
52  
53  
54  
55  
56  
57  
58  
59  
60



*Patient identification errors:* The lack of a formal patient identification system was reported. This was considered particularly problematic since Bhutanese people often have the same or similar names. A major consequence of this was the risk and incidence of patients receiving the wrong treatment or procedure.

**Table 2.** Patient safety issues and concerns

| Themes                                  | Participant statements                                                                                                                                                                                                                                                                                                                                                                                                                                                                                             |
|-----------------------------------------|--------------------------------------------------------------------------------------------------------------------------------------------------------------------------------------------------------------------------------------------------------------------------------------------------------------------------------------------------------------------------------------------------------------------------------------------------------------------------------------------------------------------|
| Medication/drug errors                  | <p>“I think the most common is errors in drug doses and medications. [...] medication error includes errors in giving IV fluids like sometimes wrong IV fluids, wrong rate of administration – improper calculation of the drop rates” (Medical doctor).</p> <p>“[...] misuse of antibiotics – sometimes you continue antibiotics even for cough and cold where it is not required. They [doctors] use high dosage of different antibiotics for organisms that are not sensitive” (Medical doctor).</p>            |
| Healthcare Associated Infections (HAIs) | <p>“Infection is definitely an issue. Previously where I used to work, [...] in a small district hospital, usually patient with small surgery – minor surgery was getting post-surgery wound infection. Wound not healing faster” (Senior Manager).</p> <p>“We do come across hospital acquired infections – people especially with long term hospitalisation tend to get urinary tract infections. I don’t know how people [healthcare providers] are handling the catheterisation process” (Medical doctor).</p> |

|                                                  |                                                                                                                                                                                                                                                                                                                                                                                                                                                          |
|--------------------------------------------------|----------------------------------------------------------------------------------------------------------------------------------------------------------------------------------------------------------------------------------------------------------------------------------------------------------------------------------------------------------------------------------------------------------------------------------------------------------|
| Surgical errors and post-operative complications | “We always hear from the operation theatre that some gauze pieces or some instrument has been left inside” (Nurse).                                                                                                                                                                                                                                                                                                                                      |
| Diagnostic errors                                | “They [doctors] misdiagnose and then sometimes they give wrong medication which I have seen in one case that the patient really had adverse effect” (Nurse).                                                                                                                                                                                                                                                                                             |
| Laboratory/blood testing errors                  | “Sometimes there are few laboratory mistakes. I don’t know whether it is the printing mistakes, sometimes we send two samples almost within 2 to 3 hours gap and the report come completely different. Maybe because staff are giving wrong sample for the other patient or is the printing mistake from the lab [...]. We have cases like same patient having done the same investigations in few hours showed vast difference in the reading” (Nurse). |
| Fall injuries                                    | “While patient is transferred in the trolley there was one incident where the patient went off the trolley. And then few times we have heard patient falling from the bed. So fall is common” (Ward Manager).                                                                                                                                                                                                                                            |
| Communication errors                             | “Most of the time the misunderstanding that happens between the patient and the staff is due to lack of adequate communication. Many a times what we have done is for example probably not spend enough time on that part - explaining the diagnosis, where is the problem, what medicine you are prescribing, how you need to take that medicine, what are the side effects of the medicines, all these things, you know” (Senior Manager - NGM1).      |

|                               |                                                                                                                                                                                                                                    |
|-------------------------------|------------------------------------------------------------------------------------------------------------------------------------------------------------------------------------------------------------------------------------|
|                               | <p>“I think one complaint we hear is that of verbal abuse by the health professionals to patients and their relatives” (Senior Manager).</p>                                                                                       |
| Patient identification errors | <p>“I think one pertinent one is for lack of patient identification marks. Our Bhutanese have similar names and then that can lead to, during procedures in rush hours, doing procedures in a wrong patient” (Medical doctor).</p> |

### **Factors contributing to patient safety concerns**

Human (staff) and system factors were identified as the main contributing factors to patient safety concerns (themes and supporting quotes are presented in Table 3).

#### ***Human (staff) factors***

**Lack of patient safety competency:** The most commonly cited factor contributing to patient safety concerns was healthcare professionals’ lack of patient safety competencies, encompassing lack of knowledge of patient safety principles and processes, not having the necessary skills to practice safely, and not displaying the ‘right’ attitude.

#### ***Knowledge***

Lack of knowledge about quality improvement and patient management processes was identified as a major contributing factor to patient safety concerns. Medication errors and HAIs were linked to healthcare professionals’ lacking requisite knowledge about medicines/drugs and infection control.

### *Skills*

Healthcare professionals' lack of patient assessment skills, for example, not checking vital signs, not taking a detailed patient history, or failure to review a patient's history, were perceived as contributing to errors such as wrong patient diagnoses and treatment.

### *Attitudes*

The most prominent issue identified was a complacent attitude among healthcare professionals (e.g. taking 'shortcuts' and carelessness). Examples included healthcare professionals not applying knowledge, despite knowing about patient safety measures, and not apportioning sufficient importance to Standard Operating Protocols and guidelines.

### *System (organizational) factors*

*Lack of resources:* All categories of participants reported that shortage of staff (poor skill mix and staff-patient ratio) was the key contributing factor to diagnostic and medication errors. Also perceived to contribute to patient safety concerns was the lack of infrastructure. This included: a lack of rooms to isolate patients with infectious diseases, to store clinical items (e.g., sterilised packs), and to carry out procedures without disruption and contamination; lack of basic materials and equipment for infection control such as disinfectants, soaps, and wound dressing supplies; dusty hospital surroundings; and absence of adequate systems to monitor hospital infection rates. Diagnostic errors were believed to be related to lack of adequate investigative resources (e.g., laboratory reagents) and lack of functional and reliable diagnostic equipment.

1  
2  
3 *Lack of policies, guidelines and protocols on patient safety:* As a consequence of the lack of  
4 policies, guidelines, standard protocols and checklists, there was perceived variation in the  
5 management of patients across different hospitals and/or wards, with treating specialists and  
6 nurses not agreeing on treatment matters.  
7  
8  
9  
10

11  
12  
13 *Poor communication and collaboration:* Healthcare professionals failing to communicate  
14 verbally and not clearly documenting patient care were reported to contribute to patient safety  
15 concerns. For example, continuation of medications for unreasonable periods of time was  
16 perceived to have resulted from poor communication between doctors and nurses. Lack of  
17 clear communication with and provision of information to patients about their disease and  
18 treatment was reported to lead to poor compliance with treatment.  
19  
20  
21  
22  
23  
24  
25  
26  
27

28 Lack of teamwork and collaboration among hospital departments and clinicians were  
29 perceived to be particularly problematic. Internal conflicts and ‘tribal fights’ were reported,  
30 with stakeholders trying to blame and ‘pull each other’s legs’ (which in Bhutan is taken to  
31 mean ‘belittling’), disrupting workplace harmony, respect and cooperation. Participants  
32 described difficulty coordinating members of departments, due to lack of cooperation.  
33  
34  
35  
36  
37  
38  
39  
40

41 *Lack of management support and governance:* Some participants believed patient safety, as  
42 an agenda, had been overlooked by leaders and managers. Patient safety and risk  
43 management have not yet permeated into the Bhutanese healthcare system, and management  
44 was perceived as not yet ready to accept change.  
45  
46  
47  
48  
49  
50  
51  
52  
53  
54  
55  
56  
57  
58  
59  
60

*Poorly developed patient safety incident reporting:* Incident reporting processes were reportedly poorly developed. For instance, robust systems did not exist to record and report incidents and it was perceived that as a result the majority of incidents went unreported.

*Lack of patient education on patient safety:* Participants contended that patients are not educated about infection control and are not aware of how to take care of their own body secretions (sputum, urine and blood), increasing the risk of cross infection. In addition, healthcare professionals' failure to inform and educate patients and the public about certain hospital functions and procedures, such as where to go in the event of emergencies and signs and symptoms of emergencies, were perceived to have contributed to patient mortality.

**Table 3.** Factors contributing to patient safety concerns

| Themes                                                      | Participant statements                                                                                                                                                                                                                                                                                                                                                                                                             |
|-------------------------------------------------------------|------------------------------------------------------------------------------------------------------------------------------------------------------------------------------------------------------------------------------------------------------------------------------------------------------------------------------------------------------------------------------------------------------------------------------------|
| <i>Human (staff) factors</i>                                |                                                                                                                                                                                                                                                                                                                                                                                                                                    |
| Lack of patient safety competency:                          |                                                                                                                                                                                                                                                                                                                                                                                                                                    |
| <ul style="list-style-type: none"> <li>Knowledge</li> </ul> | <p>“Sometimes the medication errors usually happen because they [staff] aren't aware of the right method to be given. For example, there are some medications like [name of drugs withheld] which are really painful and it should not be given direct bolus, but it should rather be given as infusion. [...] It so happens that they are given bolus and then we have to be facing a problem and solving it” (Nurse - NGM5).</p> |
| <ul style="list-style-type: none"> <li>Skills</li> </ul>    | <p>“One issue is - usually the patients are seen in [...] OPD [Out-patient Department] and they are sent here [to the ward]. So they [clinicians] did not monitor the vital signs and then we had some</p>                                                                                                                                                                                                                         |

|                                                               |                                                                                                                                                                                                                                                                                                                                                                                                                                                                                    |
|---------------------------------------------------------------|------------------------------------------------------------------------------------------------------------------------------------------------------------------------------------------------------------------------------------------------------------------------------------------------------------------------------------------------------------------------------------------------------------------------------------------------------------------------------------|
|                                                               | <p>incidents. [...] [one patient] did not have vital signs monitored and did not have [Blood Pressure checked] - actually the patient was 'walking dead'. Then we had to manage here in the ward and then ultimately send to ICU" (Ward Manager).</p>                                                                                                                                                                                                                              |
| <ul style="list-style-type: none"> <li>• Attitudes</li> </ul> | <p>"It is the attitude [of healthcare providers] sometimes" (Ward Manager).</p> <p>"If I have to say, I think certain procedures are done by people who are not very cautious about taking precautions. For example, as a medical student we knew that we have to take lots of precaution even to insert a catheter but now I see that it is being done very casually. I don't think people are really taking care of the proper sterile techniques and all" (Medical doctor).</p> |
| <i>System (organizational) factors</i>                        |                                                                                                                                                                                                                                                                                                                                                                                                                                                                                    |
| Lack of resources                                             | <p>"Contribution for medication error maybe due to the shortage of nursing staff where while they are preparing the medicine, they have to go and attend the other critical cases, if any" (Senior Manager).</p> <p>"I think the most common patient safety issue is establishing diagnosis. I find it as a major issue because patients are not properly followed up and then adequate investigating facilities are not available and we lose patient in between" (Nurse).</p>    |
| Lack of policies, guidelines and                              | <p>"One is the standard management of patient. That depends on individual specialists and individual doctors. A major crux of the</p>                                                                                                                                                                                                                                                                                                                                              |

|                                                                                                                                                                                                                                                    |                                                                                                                                                                                                                                                                                                                                                                                                                                                                                                                                                                                                                                                                                                                                                                                                                                 |
|----------------------------------------------------------------------------------------------------------------------------------------------------------------------------------------------------------------------------------------------------|---------------------------------------------------------------------------------------------------------------------------------------------------------------------------------------------------------------------------------------------------------------------------------------------------------------------------------------------------------------------------------------------------------------------------------------------------------------------------------------------------------------------------------------------------------------------------------------------------------------------------------------------------------------------------------------------------------------------------------------------------------------------------------------------------------------------------------|
| <p>1<br/>2<br/>3 protocols on patient<br/>4 safety<br/>5<br/>6<br/>7<br/>8<br/>9<br/>10</p>                                                                                                                                                        | <p>thing is how to come to a proper diagnosis and what line of<br/>treatment. So, highly qualified specialists have their own line of<br/>management which some specialists don't agree" (Senior<br/>Manager).</p>                                                                                                                                                                                                                                                                                                                                                                                                                                                                                                                                                                                                              |
| <p>11<br/>12 Poor communication<br/>13 and collaboration<br/>14<br/>15<br/>16<br/>17<br/>18<br/>19<br/>20<br/>21<br/>22<br/>23<br/>24<br/>25<br/>26<br/>27<br/>28<br/>29<br/>30<br/>31<br/>32<br/>33<br/>34<br/>35<br/>36<br/>37<br/>38<br/>39</p> | <p>"When I talk about the patient safety one thing is that there is a gap<br/>in between doctors and nurses because they prescribe antibiotics<br/>and it goes more than 20 to 30 days. [...] Doctors, when they<br/>prescribe the drugs in ward, most of the doctors they use [name of<br/>drugs withheld] which is a 3<sup>rd</sup> generation antibiotic and they do not<br/>write the specific days, like for this many days" (Nurse).</p> <p>"As of now we have a problem in getting all departments together<br/>to get a good care of the patient. For example, in the emergency we<br/>see lot of cases which need to be consulted with different<br/>departments – interdepartmental consultation. [...] But at the<br/>moment it is very difficult to have an interdepartmental<br/>consultation" (Ward Manager).</p> |
| <p>40<br/>41 Lack of management<br/>42 support and<br/>43 governance<br/>44<br/>45<br/>46<br/>47<br/>48<br/>49<br/>50<br/>51<br/>52<br/>53<br/>54<br/>55<br/>56<br/>57</p>                                                                         | <p>"Patient safety in Bhutan, in my honest opinion, there isn't<br/>anything happening. We have some visiting professors and we have<br/>some health volunteers, they come in and they try to suggest and<br/>our staff, one or two maybe, try to take initiatives or people who<br/>have seen other hospital they think we need to do something. But it<br/>is ailing, because the system is not ready to accept anything. Right<br/>now, the health system is only considered about getting drugs and<br/>how many beds we can put and how many staff we can recruit but</p>                                                                                                                                                                                                                                                  |



|                                                    |                                                                                                                                                                                                                                                                                                                                              |
|----------------------------------------------------|----------------------------------------------------------------------------------------------------------------------------------------------------------------------------------------------------------------------------------------------------------------------------------------------------------------------------------------------|
|                                                    | there is no check on how safe are the patients” (Nurse).                                                                                                                                                                                                                                                                                     |
| Poorly developed patient safety incident reporting | “I think that [incident reporting] is the weakest in the health system here. Keeping the data and then recording and reporting is very, very poor in the healthcare system- be it in National Referral Hospital or District Hospitals” (Medical doctor).                                                                                     |
| Lack of patient education on patient safety        | “I think in the hospital settings when we talk about safety of the patient and the factors, basically patients were not educated on infection control so thereby they are not able to take care of their own secretions like sputum or urine or even blood. So that is one factor that we are likely to have infections” (Health Assistant). |

### Strategies to improve patient safety

Participants identified six strategies to improve patient safety: instituting governance for patient safety, development/improvement of physical infrastructure/environment, providing adequate resources, providing patient safety training and education, promoting communication and information systems, and changing the attitudes and behaviour of healthcare professionals (themes and supporting quotes are provided in Table 4).

1  
2  
3 ***Instituting governance for patient safety:*** Institution of patient safety governance was  
4 identified as an important strategy to improve patient safety processes and practices.  
5 Participants argued a hospital patient safety program with a committee structure (e.g., patient  
6 safety, mortality, and clinical governance committees) reporting to the Ministry of Health  
7 would advance patient safety. To reduce risk of harm to patients, participants recommended  
8 implementation of robust policies, guidelines and protocols.  
9  
10  
11  
12  
13  
14  
15

16  
17  
18 ***Development/improvement of physical infrastructure/environment:*** Participants highlighted  
19 the importance to patient safety of safe physical infrastructure and a safe environment. Safe  
20 infrastructure was characterised as strong buildings with adequate ‘space’; good navigation  
21 systems (e.g., signage); an inbuilt oxygen system, ramps, electric elevators, a ventilation  
22 system and good natural lighting. A safe environment was characterised as promoting  
23 physical safety, such as providing patients with an orientation on admission and maintaining  
24 cleanliness. The provision of equipment, such as wheel chairs and beds with side rails, was  
25 also deemed to be core elements of patient safety.  
26  
27  
28  
29  
30  
31  
32  
33  
34  
35  
36

37 ***Providing adequate resources:*** Having adequate resources – including skilled and educated  
38 healthcare professionals, functional equipment and a constant supply of drugs – was  
39 considered critical to patient safety. Access to reliable laboratory facilities was considered  
40 necessary to facilitate correct patient diagnoses, treatment and management.  
41  
42  
43  
44  
45  
46  
47

48 ***Providing patient safety training and education for healthcare professionals:*** Healthcare  
49 professionals (including doctors) were perceived to have inadequate knowledge about the  
50 concept and practice of patient safety. Developing clear guidelines, protocols and programs to  
51  
52  
53  
54  
55  
56  
57  
58  
59  
60

train and educate healthcare professionals about patient safety before they entered practice was considered essential to improving patient safety.

**Promoting communication and information systems:** Promoting communication and patient safety information systems was seen as important to patient safety. For participants, patient safety could be advanced by improving teamwork and interpersonal relationships among healthcare professionals, and by instituting mechanisms to monitor patient safety.

**Changing the attitudes and behaviours of healthcare professionals:** Changing healthcare professionals' attitudes was considered critical to improving patient safety processes. Provision of education on patient safety in pre-service courses, and throughout employment, was considered essential to shaping the attitudes of and promoting respectful behaviour among healthcare professionals.

**Table 4.** Strategies to improve patient safety

| Themes                                                         | Participant statements                                                                                                                                                                                                                                                                            |
|----------------------------------------------------------------|---------------------------------------------------------------------------------------------------------------------------------------------------------------------------------------------------------------------------------------------------------------------------------------------------|
| Instituting governance for patient safety                      | “One thing is to constitute committees, especially relevant committees like clinical governance committees. [...] [...] We have to have regular updates, discussions [...] Certain bodies like quality control, mortality committee and clinical governance are very important” (Medical doctor). |
| Development/improvement of physical infrastructure/environment | “[...] the infrastructure should be such that it promotes smooth flow of patients. Patients should not get confused. They should not get lost in a health facility. [...] the infrastructure should be in a normal condition, for example, the air flow, the exposure to                          |

|                                                                              |                                                                                                                                                                                                                                                                                                                                                                                               |
|------------------------------------------------------------------------------|-----------------------------------------------------------------------------------------------------------------------------------------------------------------------------------------------------------------------------------------------------------------------------------------------------------------------------------------------------------------------------------------------|
|                                                                              | <p>sun should be good, so that we use minimum advance technologies like heating system, cooling system [...]” (Senior Manager).</p> <p>“[...] we need some trolleys, the oxygen and everything should be there and IV stands. We have the elevator here but it is not always working. So the patient sometimes gets locked inside the elevator. We need good electricity” (Ward Manager).</p> |
| Providing adequate resources                                                 | <p>“To improve patient safety in district hospital like ours, I think the first and foremost things we should have is enough staff. We should have enough equipment” (Nurse).</p>                                                                                                                                                                                                             |
| Providing patient safety training and education for healthcare professionals | <p>“I think first and foremost most of the health workers don’t have the concept of patient safety. Even doctors we are trained in different countries” (Medical doctor).</p>                                                                                                                                                                                                                 |
| Promoting communication and information systems                              | <p>“There should be proper communication between patient and the visitors and patient themselves, and also among healthcare workers because often a time there is a lot of miscommunication. This could ultimately pose a threat to patient safety” (Nurse).</p>                                                                                                                              |
| Changing the attitudes and behaviours of healthcare professionals            | <p>“First and foremost is the notion that keeping patient safety is not the responsibility of the managers or the leaders. Every individual should take each and every service or an activity in line with patient safety. [...] Patient safety has to be on our mind all the time” (Medical doctor).</p>                                                                                     |

1  
2  
3  
4  
5  
6  
7  
8  
9  
10  
11  
12  
13  
14  
15  
16  
17  
18  
19  
20  
21  
22  
23  
24  
25  
26  
27  
28  
29  
30  
31  
32  
33  
34  
35  
36  
37  
38  
39  
40  
41  
42  
43  
44  
45  
46  
47  
48  
49  
50  
51  
52  
53  
54  
55  
56  
57  
58  
59  
60

|  |                                                                                                                                                                                                                                                                                   |
|--|-----------------------------------------------------------------------------------------------------------------------------------------------------------------------------------------------------------------------------------------------------------------------------------|
|  | “It is not easy to change the attitude of people but maybe through our education system or through the training centre curriculum from day one till they leave the institute might have a role in changing the attitude and providing better safety to patient” (Senior Manager). |
|--|-----------------------------------------------------------------------------------------------------------------------------------------------------------------------------------------------------------------------------------------------------------------------------------|

## Discussion

The Bhutanese government has prioritised improving the quality of its healthcare services. However, achieving the improvements desired is proving to be difficult. A key reason for this relates to the levels of complexity involved in providing high quality services, which cannot be addressed without a well-structured dedicated program of patient safety. Arguably, one of the most striking findings of this study is the lack of a program or infrastructure for capturing quantifiable and independently verifiable data on patient safety outcomes. Despite this, the study participants identified problems and patient safety outcomes that were commensurate with those identified in other countries. The mainstream patient safety issues and contributing factors (human and system factors) identified in this study were commensurate with those found in the UK,<sup>28</sup> US,<sup>29</sup> Australia,<sup>30 31</sup> Latin America,<sup>32</sup> Thailand<sup>33</sup> and India.<sup>34-36</sup> Participants identified medication errors, HAIs, surgical errors and post-operative complications, diagnostic errors, laboratory/blood errors, fall injuries, information/communication errors and patient identification errors as key patient safety concerns in the Bhutanese healthcare system. Factors contributing to these concerns were perceived to include the system (latent failures) as well as human (staff) factors (slips, lapses and violations). Further, the strategies recommended by participants in this study are comparable to those tried and tested in other countries.<sup>37-39</sup> Participants recommended:

1  
2  
3 instituting clinical governance, developing/improving physical infrastructure (including  
4 equipment), providing adequate human resources, providing patient safety education to  
5 healthcare professionals and patients, and promoting communication and information  
6 systems.  
7  
8  
9

10  
11  
12  
13 In light of the findings of this study, patient safety interventions in the Bhutanese healthcare  
14 system may need to be targeted at several points in the hierarchy, starting with policy  
15 development, and extending to assessment and management of risk, and the implementation  
16 of processes for reducing the incidence and impact of preventable adverse events.  
17 Specifically, patient safety improvement efforts need to focus on system/organisational  
18 factors. Addressing the system/organisational factors identified in this study would help to  
19 improve the overall healthcare system safety culture, which is now widely recognised in the  
20 patient safety literature as being critical to reducing the incidence and impact of preventable  
21 adverse events.<sup>40-42</sup>  
22  
23  
24  
25  
26  
27  
28  
29  
30  
31  
32  
33  
34

35 One of the key recommendation made by participants in this study was to institute  
36 governance for patient safety: instituting patient safety monitoring committees and  
37 developing clear patient safety guidance documents. As suggested by this finding, a highly  
38 visible and functional patient safety committee/program within Bhutan's Ministry of Health  
39 and guidance documents are needed, in conjunction with secure and adequate funding to  
40 make significant improvements in patient safety. Such a safety program needs to include  
41 clear goals for safety; defining safety and risk management systems (including developing  
42 tools for identifying and analysing adverse events, and evaluating approaches taken to solve  
43 issues). Literature suggests that the institution of patient safety committees (including the  
44 establishment of national patient safety foundations and in-hospital patient safety  
45  
46  
47  
48  
49  
50  
51  
52  
53  
54  
55  
56  
57  
58  
59  
60

1  
2  
3 committees) and patient safety guidance documents are imperative to enhancing patient  
4 safety in healthcare.<sup>43-45</sup> The essential functions that patient safety committees can serve  
5 include: overseeing patient safety programs, developing expertise and managing resources.<sup>46-</sup>  
6  
7  
8  
9  
10  
11  
12  
13  
14  
15  
16  
17  
18  
19  
20  
21  
22  
23  
24  
25  
26  
27  
28  
29  
30  
31  
32  
33  
34  
35  
36  
37  
38  
39  
40  
41  
42  
43  
44  
45  
46  
47  
48  
49  
50  
51  
52  
53  
54  
55  
56  
57  
58  
59  
60

<sup>48</sup> Development of clear patient safety guidance documents could improve patient safety in the Bhutanese healthcare system by establishing minimum levels of performance, maintaining consistency or uniformity across multiple individuals and organisations, setting expectations about what is to be achieved and fostering a shared set of beliefs, attitudes and norms, and prevent variation in clinical practice.<sup>43 45 49-54</sup> Most importantly, development of adjunct guidance documents by the Bhutan Ministry of Health (with explicit process maps and decision trees detailing what healthcare professionals should do during the course of patient care) would help change the attitudes and behaviours of healthcare professionals.

As suggested by the findings of this study, development and/or improvement of physical infrastructure/environment (including equipment), providing adequate human resources, providing patient safety education to healthcare professionals and patients, and promoting communication and information systems, are also fundamental to improving patient safety. Research suggests that there is a positive relationship between these components and patient safety. For example, the lack of and/or poorly organised physical infrastructure or environment can have a significant impact on patient safety – including, for example, cross infection and falls.<sup>38 55-60</sup> The higher the ratio of qualified healthcare professionals to patients the better the patient safety outcomes - lower rates of medication errors and wound infections.<sup>61-68</sup> Patient safety education and training programs have been shown to increase healthcare professionals' ability to analyze and solve patient safety problems.<sup>69 70</sup> Promoting communication and information systems such as information technology or decision support systems such as computerised physician order entry, which are designed to assist healthcare

1  
2  
3 professionals in applying new information to patient care through the analysis of patient  
4 specific variables, are believed to improve communication on all levels.<sup>71-74</sup> For instance,  
5 computerised devices like Personal Digital Assistant, which provide useful and accurate  
6 clinical practice guidelines and an alert system have been found to be more efficient than  
7 their paper-based counterparts.<sup>75</sup>  
8  
9  
10  
11  
12

13  
14  
15 On the basis of the findings of this study, and in keeping with the immediate priorities for  
16 national action on matters of patient safety, the cornerstone for a comprehensive strategy to  
17 improve patient safety in the Bhutanese healthcare system involves (1) a national focus on  
18 patient safety; (2) leadership, tools and protocols to enhance the knowledge base about safety;  
19 (3) patient safety governance; and (4) patient safety education and training.  
20  
21  
22  
23  
24  
25  
26  
27

#### 28 National focus on patient safety

29  
30 A national focus on patient safety entails setting national standards for patient safety;  
31 developing a strategic framework for patient safety; establishing a national patient safety  
32 program; instituting a national patient safety governance committee; establishing well trained  
33 and supported patient safety consultation teams (groups with specific responsibility for  
34 patient safety); and developing national policies on patient safety (service policy to establish  
35 resource allocation; practice policy that depicts minimum level of safety management and  
36 treatments; governance policy; sentinel event policy which provides clear guidance on  
37 appropriate responses to such situations; educational policy; and patient/staff abuse policy).  
38  
39  
40  
41  
42  
43  
44  
45  
46  
47  
48  
49

#### 50 Leadership for patient safety

51  
52 Leadership to promote patient safety involves launching patient safety initiatives in hospitals;  
53 allocating a budget for patient safety initiatives and ensuring they are adequately resourced;  
54  
55  
56  
57



1  
2  
3 initiating change management programs to build support for patient safety by the leaders of  
4 various health programs; developing research agendas (to understand the nature and extent of  
5 patient safety concerns; implement effective strategies to improve patient safety; and conduct  
6 research focused on teaching and learning of patient safety concerns and solutions); and  
7 establishing measures of performance (e.g., developing and disseminating tools for  
8 identifying and analysing patient safety concerns and evaluating correction measures).  
9  
10  
11  
12  
13  
14  
15

### 16 17 18 Patient safety governance

19  
20 Governance for patient safety requires development of a patient safety framework and policy;  
21 developing and implementing practice standards and guidelines for clinical practices and  
22 procedures; developing and implementing clinical bundles, pathways and protocols related to  
23 specific medical conditions and practices; developing and implementing checklists for  
24 different clinical practices, procedures and technologies/equipment; improving existing  
25 quality assurance processes; and developing clear job descriptions.  
26  
27  
28  
29  
30  
31  
32  
33  
34

### 35 Patient safety training and education

36  
37 Continuing patient safety training and education should be provided to all categories of  
38 healthcare staff (including cleaners and ward aides/assistants). This involves developing  
39 educational curricula on patient safety in institutes, universities and hospitals (for all  
40 categories of healthcare professionals undertaking certificate, diploma, higher degrees, and  
41 continuing medical education); developing and implementing standard protocols and  
42 guidelines for supervision and monitoring of students and junior clinicians; promoting  
43 dissemination of information on best practices; and providing healthcare professionals with  
44 training in risk management.  
45  
46  
47  
48  
49  
50  
51  
52  
53  
54  
55  
56  
57  
58  
59  
60

1  
2  
3 In addition, development of a program to identify and address specific patient safety issues is  
4 recommended. This includes addressing medication safety, surgical errors, diagnostic errors,  
5 laboratory/blood products, identification errors, HAIs and falls injuries by adopting six key  
6 methods of data collection and measurement, encompassing: patient outcome measurements  
7 (mortality and morbidity statistics); auditing of clinical practice, resource use and program  
8 activities; measurement of patient satisfaction; systematic reporting and monitoring of patient  
9 safety data; and patient safety research. These processes help in detecting and monitoring a  
10 broad range of medical errors and solutions.<sup>50 76-79</sup> Strategies to address specific patient safety  
11 issues include, for example, patient identification by bracelet, correct labelling of medicines,  
12 implementation of unit-dose systems for medications, policies for blood transfusion and  
13 implementation of guidelines and/or protocols for the prevention of wrong patient, wrong site  
14 and wrong surgical procedure.  
15  
16  
17  
18  
19  
20  
21  
22  
23  
24  
25  
26  
27  
28  
29  
30

### 31 **Strengths and limitations**

32  
33 A key strength of this study is the contribution it makes to a deeper awareness and  
34 understanding of the patient safety issues and concerns in the cultural context of Bhutan.  
35 Analysis of the data revealed the issues and concerns identified were commensurate with  
36 those experienced in other resource poor countries including the challenges of successfully  
37 addressing them. The main limitation of the study reported here is its reliance on patient  
38 safety concepts, theories and practices that have been developed and applied in high-income  
39 resource-rich nations. This, however, is also a strength of the study, since one of its aims was  
40 to explore the 'fit' or otherwise of such a frame in under-resourced and data-poor nations, and  
41 to make meaningful comparisons. On the basis of the comparisons made, establishing a  
42 foundation for informing a locally adapted program to address patient safety problems/issues  
43 identified in Bhutan has been rendered possible. A second limitation of the study relates to  
44  
45  
46  
47  
48  
49  
50  
51  
52  
53  
54  
55  
56  
57  
58  
59  
60

1  
2  
3 the large amount of data generated. As previously reported <sup>26</sup>, decisions about inclusion and  
4  
5 exclusion of data were informed by the consistency of findings across the disparate  
6  
7 participant groups and the themes and/or issues that were pertinent to informing the patient  
8  
9 safety concerns in the healthcare context of Bhutan. In this process it is possible that some  
10  
11 material may have been lost.  
12  
13  
14

## 15 **Conclusion**

16  
17 This study pioneers the exploration of patient safety issues and concerns in Bhutan's  
18  
19 healthcare system. The study has identified medication errors, HAIs, surgical errors and post-  
20  
21 operative complications, diagnostic errors, laboratory/blood errors, fall injuries,  
22  
23 communication errors and patient identification errors as key patient safety concerns. Factors  
24  
25 contributing to these concerns were identified to include system as well as human factors.  
26  
27 The strategies recommended by participants indicate that a system to mitigate risks caused by  
28  
29 both human and system factors is required to improve patient safety in Bhutan's healthcare  
30  
31 system.  
32  
33  
34  
35  
36

37 Overall, this study has provided a basis upon which future research and patient safety  
38  
39 improvement strategies can be identified and developed. An immediate strategy, based on the  
40  
41 findings of this study, would be to conceptualise and position patient safety as a priority for  
42  
43 Bhutan's healthcare system and its leaders. Interventions need to target several points in the  
44  
45 hierarchy, starting from policy development and extending to assessment and management of  
46  
47 risk, and to reducing the incidence and impact of disruptive behaviours. Additionally, the  
48  
49 provision of patient safety training and education for healthcare professionals and patients is  
50  
51 required. These strategies would help improve overall safety by preventing adverse events.  
52  
53  
54  
55  
56  
57  
58  
59  
60

**Acknowledgement**

The authors sincerely thank Dr Megan-Jane Johnstone for her helpful comments on this article and for her support for this research.

**Conflict of interest**

The authors declare that there is no conflict of interest

**Funding:** The author(s) received no financial support for the research, authorship, and/or publication of this article.

**Data sharing statement:** No additional data are available.

**Authors' contribution:**

The first author conceived the study. Both authors designed the study and developed the study protocol. RP collected and analysed the data. The second author supervised data collection and data analysis. Both authors prepared and approved this paper.

## References

1. Donaldson L. Championing patient safety: going global. *Qual Saf Health Care* 2002;11:112. [published Online First: Jun]
2. World Health Organization. Final technical report for the conceptual framework for the international classification for patient safety, version 1.1. WHO, Geneva: Chapter: The international classification for patient safety key concepts and preferred terms. 2009a. [http://www.who.int/patientsafety/taxonomy/icps\\_full\\_report.pdf](http://www.who.int/patientsafety/taxonomy/icps_full_report.pdf) (accessed 1 March 2012).
3. World Health Organization. Patient safety research. 2012b. <http://www.who.int/patientsafety/research/en/> (accessed 15 April, 2012).
4. World Health Organization. Global priorities for patient safety research: better knowledge for safer care. 2009a. [http://whqlibdoc.who.int/publications/2009/9789241\\_eng.pdf](http://whqlibdoc.who.int/publications/2009/9789241_eng.pdf) (accessed 13 April, 2012 ).
5. Jha AK, Prasopa-Plaizier N, Larizgoitia I, et al. Patient safety research: an overview of the global evidence. *Qual Saf Health Care* 2010;19:42-47.
6. Yoelao D, Mohan KP, Hamid HSA. A Review of Patient Safety in Thailand and Malaysia. *Int J Behav Sci* 2014;9:53-70.
7. Siddiqi S, Elasady R, Khorshid I, et al. Patient safety friendly hospital initiative: from evidence to action in seven developing country hospitals. *Int J Qual Health Care* 2012;24:144-51.
8. Hernandez K, Ramos E, Seas C, et al. Incidence of and risk factors for surgical-site infections in a Peruvian hospital. *Infect Control Hosp Epidemiol* 2005;26:473-77.
9. Charuluxananan S, Sriraj W, Lapisatepun W, et al. Drug errors from Thailand Anesthesia Incidents Study (Thai AIMS): analysis of 1,996 incident reports: 17AP2 - 8. *Eur J Anaesthesiol* 2012;6:541-47.

10. Jirapaet V, Jirapaet K, Sopajaree C. The Nurses ' Experience of Barriers to Safe Practice in the Neonatal Intensive Care Unit in Thailand. *J Obstet Gynecol Neonatal Nurs* 2006;35:746-54.
11. Taxis K, Barber N. Causes of intravenous medication errors: an ethnographic study. *Qual Saf Health Care* 2003;12:343-48.
12. Reason JT. Understanding adverse events: human factors. *Qual Health Care* 1995;4:80-89.
13. Reason JT. Human error: models and management. *BMJ* 2000;320:768-70.
14. Reason JT. Beyond the organisational accident: the need for "error wisdom" on the frontline. *Qual Saf Health Care* 2004;13:ii28-ii33.
15. Reason JT. Human error. Cambridge: Cambridge University Press 1990.
16. Reason JT. Safety in the operating theatre – Part 2: Human error and organisational failure. *Qual Saf Health Care* 2005;14:56–60.
17. Cronenwett L, Sherwood G, Barnsteiner J, et al. Quality and safety education for nurses. *Nurs Outlook* 2007;55:122-31.
18. Cowan DT, Norman I, Coopamah VP. Competence in nursing practice: a controversial concept-a focused review of literature. *Nurse Educ Today* 2005;25:355-62.
19. Chuenjitwongsa S, Oliver RG, Bullock AD. Competence, competency-based education, and undergraduate dental education: a discussion paper. *Eur J Dent Educ* 2018;22:1-18.
20. Garside JR, Nhemachena JZZ. A concept analysis of competence and its transition in nursing. *Nurse Educ Today* 2013;33:541-45.
21. Madigosky WS, Headrick LA, Nelson K, et al. Changing and sustaining medical students' knowledge, skills, and attitudes about patient safety and medical fallibility. *Acad Med* 2006;81:94-101.

- 1  
2  
3 22. Schall R, Stone PW, Currie L, et al. Development of a self-report instrument to measure  
4 patient safety attitudes, skills, and knowledge. *J Nurs Scholarsh* 2008;40:391-94.  
5  
6  
7 23. Patton MQ. Qualitative research & evaluation methods. 3rd ed. Thousand Oaks,  
8 California: Sage Publications 2002.  
9  
10  
11 24. Sandelowski M. Whatever happened to qualitative description? *Res Nurs Health*  
12 2000;23:334-40.  
13  
14  
15 25. Brink PJ, Wood MJ. Advanced design in nursing research 2nd ed. California: Sage 1998.  
16  
17  
18 26. Pelzang R. Patient safety issues and concerns in Bhutan's healthcare system: a qualitative  
19 study. Deakin University, 2016.  
20  
21  
22 27. Smith J, Firth J. Qualitative data analysis: the framework approach. *Nurse Res*  
23 2011;18:52-62.  
24  
25  
26 28. Healey F, Scobie S, Oliver D, et al. Falls in English and Welsh hospitals: a national  
27 observational study based on retrospective analysis of 12 months of patient safety  
28 incident reports. *Qual Saf Health Care* 2008;17:424-30.  
29  
30  
31 29. Linden JV, Wagner K, Voytovich AE, et al. Transfusion errors in New York State: an  
32 analysis of 10 years' experience. *Transfusion* 2000;40:1207-13.  
33  
34  
35 30. Kable AK, Gibberd RW, Spigelman AD. Adverse events in surgical patients in Australia.  
36 *Int J Qual Health Care* 2002;14:269-76.  
37  
38  
39 31. Nichols P, Copeland T, Craib IA, et al. Learning from error: identifying contributory  
40 causes of medication errors in an Australian hospital. *Med J Aust* 2008;188:276-79.  
41  
42  
43 32. Aranaz-Andres JM, Aibar-Rejon C, Limon-Ramirez R, et al. Prevalence of adverse  
44 events in the hospitals of five Latin American countries: results of the 'Iberoamerican  
45 study of adverse events' (IBEAS). *BMJ Qual Saf* 2012;20:1043-51.  
46  
47  
48  
49  
50  
51  
52  
53  
54  
55  
56  
57  
58  
59  
60

- 1  
2  
3 33. Asavaroengchai S, Sriratanaban J, Hiransuthikul N, et al. Identifying adverse events in  
4 hospitalized patients using global trigger tool in Thailand. *Asian Biomed* 2009;3:545-  
5 50.  
6  
7  
8  
9 34. Datta P, Rani H, Chauhan R, et al. Health-care-associated infections: Risk factors and  
10 epidemiology from an intensive care unit in Northern India. *Indian J Anaesth*  
11 2014;58:30-35.  
12  
13  
14  
15 35. Harrison R, Cohen AW, Walton M. Patient safety and quality of care in developing  
16 countries in Southeast Asia: a systematic literature review. *Int J Qual Health Care*  
17 2015;27:240–54.  
18  
19  
20  
21  
22 36. Kumar S, Chaudhary S. Medical errors and consequent adverse events in critically ill  
23 surgical patients in a tertiary care teaching hospital in Delhi. *J Emerg Trauma Shock*  
24 2009;2:80-84.  
25  
26  
27  
28  
29 37. Elkin PL, Gorman PN. Continuing medical education and patient safety: an agenda for  
30 lifelong learning. *J Am Med Inform Assoc* 2002;9:S128-S32.  
31  
32  
33 38. Hignett S, Lu J. Space to care and treat safely in acute hospitals: recommendations from  
34 1866 to 2008. *Appl Ergon* 2010;41:666-73.  
35  
36  
37 39. Reiling J, Breckbill C, Murphy M, et al. Facility Designing Around Patient Safety and its  
38 Effect on Nursing. *Nurs Econ* 2003;21:143-47.  
39  
40  
41 40. Morello RT, Lowthian JA, Barker AL, et al. Strategies for improving patient safety  
42 culture in hospitals: a systematic review. *BMJ Qual Saf* 2013;22:11-18.  
43  
44  
45 41. Vogus TJ, Weick KE, Sutcliffe KM. Doing No Harm: Enabling, Enacting, and  
46 Elaborating a Culture of Safety in Health Care. *Acad Manag Perspect* 2010;24:60-77.  
47  
48  
49 42. Zaheer S, Ginsburg L, Chuang YT, et al. Patient safety climate (PSC) perceptions of  
50 frontline staff in acute care hospitals: examining the role of ease of reporting, unit  
51  
52  
53  
54  
55  
56  
57  
58  
59  
60



- norms of openness, and participative leadership. *Health Care Manage Rev* 2015;40:13-23.
43. Kohn LT, Corrigan JM, Donaldson MS. To err is human: Building a safer health system. Washington D.C.: National Academy Press 2000.
44. Clinical Excellence Commission. Patient safety research: A review of the technical literature The centre for Clinical Research, University of New South Wales, Sydney Donald Hindle, Jeffrey Braithwaite and Rick Ledema 2005.
45. Adibi H, Khalesi N, Ravaghi H, et al. Development of an effective risk management system in a teaching hospital. *Journal Diabetes Metab Disord* 2012;11:15.
46. Boddington R, Arthur H, Cummings D, et al. Team Resource Management and patient safety: A team focused approach to clinical governance. *Clin Govern Int J* 2006;11:58 - 68.
47. Sage WM, Gallagher TH, Armstrong S, et al. How policy makers can smooth the way for communication-and-resolution programs. *Health Aff* 2014;33:11-19.
48. Scott I. What are the most effective strategies for improving quality and safety of health care? *Intern Med J* 2009;39:389-400.
49. Szymanska M, Ryan CA, Murphy BP. Introducing random safety audits (RSA) in a neonatal intensive care unit (NICU). *Ir Med J* 2011;104:114-17.
50. Ursprung R, Gray JE, Edwards WH, et al. Real time patient safety audits: improving safety every day. *Qual Saf Health Care* 2005;14:284-89.
51. McDonald R, Waring J, Harrison S, et al. Rules and guidelines in clinical practice: a qualitative study in operating theatres of doctors' and nurses' views. *Qual Saf Health Care* 2005;14:290-94.
52. Classen DC, Kilbridge PM. The roles and responsibility of physicians to improve patient safety within health care delivery system. *Acad Med* 2002;77:963-72.

- 1  
2  
3 53. Institute of Medicine. Crossing the Quality Chasm: A New Health System for the 21st  
4  
5 Century. Washington, D.C: National Academies Press 2001.  
6  
7 54. Nolan TW. System changes to improve patient safety. *BMJ* 2000;320:771-73.  
8  
9 55. Flynn EA, Barker KN, Gibson JT, et al. Relationships between ambient sounds and the  
10 accuracy of pharmacists' prescription-filling performance. *Hum Factors* 1996;38:614-  
11 22.  
12  
13 56. Mahmood A, Chaudhury H, Valente M. Nurses' perceptions of how physical environment  
14 affects medication errors in acute care settings. *Appl Nurs Res* 2011;24:229-37.  
15  
16 57. Muto CA, Jernigan JA, Ostrowsky BE, et al. SHEA guideline for preventing nosocomial  
17 transmission of multidrug-resistant strains of *Staphylococcus aureus* and  
18 *enterococcus*. *Infect Control Hosp Epidemiol* 2003;24:362-86.  
19  
20 58. Reiling J, Knutzen BL, Wallen TK, et al. Enhancing the traditional hospital design  
21 process: a focus on patient safety. *Jt Comm J Qual Saf* 2004;30:115-24.  
22  
23 59. Rubin HR. Status report--an investigation to determine whether the built environment  
24 affects patients' medical outcomes. *J Healthc Des* 1998;10:11-13.  
25  
26 60. Walsh-Sukys M, Reitenbach A, Hudson-Barr D, et al. Reducing light and sound in the  
27 neonatal intensive care unit: an evaluation of patient safety, staff satisfaction and  
28 costs. *J Perinatol* 2001;21:230-35.  
29  
30 61. Archibald LK, Manning ML, Bell LM, et al. Patient density, nurse-to-patient ratio and  
31 nosocomial infection risk in a pediatric cardiac intensive care unit. *Pediatr Infect Dis*  
32 *J* 1997;16:1045-48.  
33  
34 62. Hugonnet S, Chevrolet JC, Pittet D. The effect of workload on infection risk in critically  
35 ill patients. *Crit Care Med* 2007;35:76-81.  
36  
37 63. Lichtig LK, Knauf RA, Milholland DK. Some impacts of nursing on acute care hospital  
38 outcomes. *J Nur Adm* 1999;29:25-33.  
39  
40  
41  
42  
43  
44  
45  
46  
47  
48  
49  
50  
51  
52  
53  
54  
55  
56  
57  
58  
59  
60

- 1  
2  
3 64. Nantsupawat A, Nantsupawat R, Kulnaviktikul W, et al. Relationship between nurse  
4 staffing levels and nurse outcomes in community hospitals, Thailand. *Nurs Health Sci*  
5 2014 [published Online First: April 4]  
6  
7  
8  
9 65. Needleman J, Buerhaus P, Mattke S, et al. Nurse-staffing levels and the quality of care in  
10 hospitals. *N Engl J Med* 2002;346:1715-22.  
11  
12  
13 66. Robertson RH, Hassan M. Staffing intensity, skill mix and mortality outcomes: the case  
14 of chronic obstructive lung disease. *Health Serv Manage Res* 1999;12:258-68.  
15  
16  
17 67. Stegenga J, Bell E, Matlow A. The role of nurse understaffing in nosocomial viral  
18 gastrointestinal infections on a general pediatrics ward. *Infect Control Hosp*  
19 *Epidemiol* 2002;23:133-36.  
20  
21  
22  
23 68. McGillis HL, Doran D, Pink GH. Nurse staffing models, nursing hours, and patient safety  
24 outcomes. *J Nurs Adm* 2004;34:41-45.  
25  
26  
27  
28 69. Patey R, Flin R, Cuthbertson BH, et al. Patient safety: helping medical students  
29 understand error in healthcare. *Qual Saf Health Care* 2007;16:256-59.  
30  
31  
32  
33 70. Chopra V, Gesink BJ, de Jong J, et al. Does training on an anaesthesia simulator lead to  
34 improvement in performance? *Br J Anaesth* 1994;73:293-97.  
35  
36  
37  
38 71. Koppel R, Metlay JP, Cohen A, et al. Role of computerized physician order entry systems  
39 in facilitating medication errors. *JAMA* 2005;293:1197-203.  
40  
41  
42 72. Bates DW, Kuperman G, Teich JM. Computerized physician order entry and quality of  
43 care. *Qual Manag Health Care* 1994;2:18-27.  
44  
45  
46 73. Bates DW, Spell N, Cullen DJ, et al. The costs of adverse drug events in hospitalized  
47 patients. Adverse Drug Events Prevention Study Group. *JAMA* 1997;277:307-11.  
48  
49  
50 74. Wong J, Beglaryan H. Strategies for hospitals to improve patient safety: A review of the  
51 research. 2004. <http://www.psnet.ahrq.gov/resource.aspx?resourceID=1341> (accessed  
52 6 August 2014).  
53  
54  
55  
56  
57  
58  
59  
60

- 1  
2  
3 75. VanDenKerkhof EG, Goldstein DH, Lane J, et al. Using a personal digital assistant  
4 enhances gathering of patient data on an acute pain management service: a pilot study.  
5  
6 *Can J Anaesth* 2003;50:368-75.  
7  
8  
9 76. Garrouste-Orgeas M, Philippart F, Bruel C, et al. Overview of medical errors and adverse  
10 events. *Ann Intensive Care* 2012;2:2-10.  
11  
12  
13 77. Jarernsripornkul N, Krska J, Capps PA, et al. Patient reporting of potential adverse drug  
14 reactions: a methodological study. *Br J Clin Pharmacol* 2002;53:318-25.  
15  
16  
17 78. Piotrowski MM, Hinshaw DB. The safety checklist program: creating a culture of safety  
18 in intensive care unit. *Jt Comm J Qual Improv* 2002;28:306-15.  
19  
20  
21 79. Wolff AM, Bourke J. Reducing medical error: a practical guide. *Med J Aust*  
22  
23 2000;173:247-51.  
24  
25  
26  
27  
28  
29  
30  
31  
32  
33  
34  
35  
36  
37  
38  
39  
40  
41  
42  
43  
44  
45  
46  
47  
48  
49  
50  
51  
52  
53  
54  
55  
56  
57  
58  
59  
60

# BMJ Open

## Patient safety issues and concerns in Bhutan's healthcare system: a qualitative exploratory descriptive study

|                                 |                                                                                                                                                                                                                            |
|---------------------------------|----------------------------------------------------------------------------------------------------------------------------------------------------------------------------------------------------------------------------|
| Journal:                        | <i>BMJ Open</i>                                                                                                                                                                                                            |
| Manuscript ID                   | bmjopen-2018-022788.R2                                                                                                                                                                                                     |
| Article Type:                   | Research                                                                                                                                                                                                                   |
| Date Submitted by the Author:   | 06-Jun-2018                                                                                                                                                                                                                |
| Complete List of Authors:       | Pelzang, Rinchen; Deakin University, School of Nursing and Midwifery<br>Hutchinson, Alison; Deakin University School of Nursing and Midwifery,<br>School of Nursing and Midwifery                                          |
| <b>Primary Subject Heading</b>: | Qualitative research                                                                                                                                                                                                       |
| Secondary Subject Heading:      | Health policy, Health services research                                                                                                                                                                                    |
| Keywords:                       | Clinical governance < HEALTH SERVICES ADMINISTRATION & MANAGEMENT, Health policy < HEALTH SERVICES ADMINISTRATION & MANAGEMENT, Quality in health care < HEALTH SERVICES ADMINISTRATION & MANAGEMENT, QUALITATIVE RESEARCH |
|                                 |                                                                                                                                                                                                                            |

SCHOLARONE™  
Manuscripts

1  
2  
3 **Title of the Manuscript:** Patient safety issues and concerns in Bhutan's healthcare system: a  
4 qualitative exploratory descriptive study  
5  
6  
7

8  
9 **Corresponding author's address:**

10 Dr Rinchen Pelzang

11 Higher Degree by Research Unit

12 School of Nursing and Midwifery

13 Deakin University

14 221 Burwood Highway

15 Melbourne VIC 3125

16 AUSTRALIA

17 E-mail: [rpelzang1970@gmail.com](mailto:rpelzang1970@gmail.com)

18 Phone number: +61 0457780018

19 Fax: +61 3 9627 4877  
20  
21  
22  
23  
24  
25  
26  
27  
28  
29  
30  
31  
32  
33  
34

35 **Authors:**

36 Dr Rinchen Pelzang\* [*Doctor of Philosophy (PhD), Master of Nursing Science (MNS),*  
37 *Postgraduate Diploma in Nursing Science – Clinical Education (PGDipNS-ClinEd),*  
38 *Bachelor of Nursing (BN), Diploma in Psychiatric Nursing (DPN), Diploma in General*  
39 *Nursing and Midwife (DGNM), Registered Nurse (RN)]*

40 Deakin University (School of Nursing and Midwifery)

41 75 Pigdons Rd

42 Geelong VIC 3216

43 AUSTRALIA  
44  
45  
46  
47  
48  
49  
50  
51  
52  
53  
54  
55  
56  
57  
58  
59  
60

1  
2  
3 Professor Alison M. Hutchinson [*Doctor of Philosophy (PhD), Master of Bioethics*  
4 (*MBioethics*), *Certificate in Midwifery (Cert Midwifery)*, *Bachelor of Applied Science –*  
5 *Advanced Nursing (BAppSci -Adv Nsg), Registered Nurse (RN)*]  
6  
7

8  
9 Deakin University (Centre for Quality and Patient Safety Research, School of Nursing and  
10  
11 Midwifery); Monash Health  
12

13  
14 75 Pigdons Rd

15  
16 Geelong VIC 3216

17  
18 AUSTRALIA  
19  
20  
21

22 **\*Corresponding author**  
23  
24  
25

26 **Keywords:** Bhutan, patient safety, clinical governance, medical errors, quality assurance  
27  
28  
29

30  
31 **Running title:** Patient safety issues and concerns in Bhutan  
32  
33  
34

35 **Total word counts:** *Abstract – 205*  
36

37 *Text – 6980*  
38  
39  
40

41 **Ethical approval:** Ethical approvals were obtained from the Research Ethics Board of Health,  
42  
43 Ministry of Health, Bhutan (REBH/Approval/2012/018) and the Deakin University Human Research  
44  
45 Ethics Committee (DUHREC 2012-221) – *copies of approval letters can be provided on request.*  
46  
47  
48  
49  
50  
51  
52  
53  
54  
55  
56  
57  
58  
59  
60

1  
2  
3 **Patient safety issues and concerns in Bhutan's healthcare system: a qualitative**  
4 **exploratory descriptive study**  
5  
6  
7

8  
9 **Abstract**

10  
11 **Objectives:** To investigate what healthcare professionals perceived and experienced as key  
12 patient safety concerns in Bhutan's healthcare system.  
13

14  
15 **Design:** Qualitative exploratory descriptive inquiry.  
16

17  
18 **Settings:** Three different levels of hospitals, a training institute and the Ministry of Health,  
19 Bhutan.  
20

21  
22 **Participants:** In total, 140 healthcare professionals and managers.  
23

24  
25 **Methods:** Narrative data were collected via conversational in-depth interviews and Nominal  
26 Group Meetings. All data were subsequently analyzed using thematic analysis strategies.  
27

28  
29 **Results:** The data revealed that medication errors, healthcare associated infections, diagnostic  
30 errors, surgical errors and post-operative complications, laboratory/blood testing errors, falls,  
31 patient identification and communication errors, were perceived as common patient safety  
32 concerns. Human and system factors were identified as contributing to these concerns.  
33 Instituting clinical governance, developing and improving the physical infrastructure of  
34 hospitals, providing necessary human resources, ensuring staff receive patient safety  
35 education, and promoting 'good' communication and information systems were, in turn, all  
36 identified as processes and strategies critical to improving patient safety in the Bhutanese  
37 healthcare system.  
38  
39

40  
41 **Conclusion:** Patient safety concerns described by participants in this study were  
42 commensurate with those identified in other low and middle-income countries. In order to  
43 redress these concerns, the findings of this study suggest that in the Bhutanese context patient  
44 safety needs to be conceptualised and prioritised.  
45  
46  
47



## Key words

Bhutan, patient safety, clinical governance, medical errors, quality assurance

## Strengths and limitations of this study (summary)

- A strength of this study is the qualitative exploratory descriptive approach used, a pragmatic approach which enabled capture of participants' experiences of the real world context.
- The detailed account of the problem and the capture of meaningful characteristics related to real life events is a strength of the study.
- A further strength of the study is the inclusion of health professionals from a range of disciplinary backgrounds across three levels of hospitals.
- Reliance on patient safety concepts, theories and practices that have been developed and applied in high-income resource-rich nations is the main limitation of this study.
- The large quantity of data generated required decisions about inclusion and exclusion of data, which may have resulted in the loss of some material.

## Introduction

The World Health Organisation (WHO) has recognised patient safety as a global problem and positioned it as a worldwide endeavor, seeking to bring benefits to patients in countries rich and poor, developed and developing alike.<sup>1</sup> It is estimated that each year millions of patients worldwide suffer disabilities, injuries or death due to unsafe medical care, and that around 50% of these harmful outcomes are preventable.<sup>2 3</sup> The incidence and impact of preventable harmful events are particularly burdensome in developing and transitional-income countries.<sup>2</sup>

3

1  
2  
3 Despite patient safety being positioned by WHO as a global priority, improving patient safety  
4 outcomes in resource poor nations is challenging. One reason for this is a lack of reliable data  
5 to quantify the burden of unsafe patient care and, in turn, inform patient safety improvement  
6 initiatives.<sup>4</sup> Another reason is that most current data on patient safety come from developed  
7 or high-income countries, where the healthcare contexts are different and where processes for  
8 improving patient safety outcomes cannot be readily transferred to other (less resourced)  
9 countries and their local healthcare settings.<sup>5 6</sup> Even so, it is estimated that rates of adverse  
10 events in low-income countries are higher than those of high-income countries. For example,  
11 the risk of healthcare associated infections in low-income countries is estimated to be 20  
12 times higher than in high-income countries.<sup>7</sup> Similarly, research evidence suggests the  
13 prevalence of preventable surgical adverse event rates in low-income countries is five times  
14 more than in high-income countries.<sup>8</sup>

15  
16  
17  
18  
19  
20  
21  
22  
23  
24  
25  
26  
27  
28  
29  
30  
31 Most adverse events have been found to be associated with human (staff) factors and system  
32 (organisational) factors.<sup>9-11</sup> Human (staff) factors include slips, lapses, violations and  
33 mistakes made by healthcare professionals (such as nurse, physicians, surgeons, pharmacists,  
34 anaesthetists) due to aberrant mental processes such as inattention, forgetfulness,  
35 carelessness, negligence, recklessness, poor motivation and lack of competency (knowledge,  
36 skills and attitude).<sup>12-17</sup> In medical and nursing literature, competency is classified according  
37 to knowledge, skills and attitudes.<sup>17-22</sup> Knowledge relates to healthcare professionals' ability  
38 to recognise and understand the potential patient safety features and/or strategies (i.e.,  
39 correctly prescribing medication - right drug, for the right reasons). Skills relate to healthcare  
40 professionals' ability to perform clinical tasks correctly to reduce risk of harm to patients  
41 (i.e., the correct preparation and administration of injections, the prevention of cross  
42 infection, accurately checking vital signs, and taking a full patient history). Finally, attitudes  
43  
44  
45  
46  
47  
48  
49  
50  
51  
52  
53  
54  
55  
56  
57  
58  
59  
60

1  
2  
3 relate to healthcare professionals' ability to value the patient safety prevention strategies and  
4 follow them (i.e., value own role in preventing errors by following standard protocols).  
5  
6 System (organisational) factors relate to the conditions under which individuals work and can  
7 be used to build defences to avert errors or mitigate their effects.<sup>13</sup> System (organisational)  
8 factors include effective patient safety and clinical governance, financial resources,  
9 educational system and hospital design.  
10  
11  
12  
13  
14  
15  
16  
17

18 In Bhutan, patient safety issues and concerns are not well documented or known. To date  
19 there have been no published studies scoping either the nature or impact of patient safety  
20 concerns in Bhutan's healthcare system. Thus, at this time, as noted in the WHO *Global*  
21 *priorities for patient safety research*,<sup>4</sup> the main option for informing strategies aimed at  
22 improving patient safety in Bhutan is to scope stakeholders' perceptions and personal  
23 experiences of patient safety processes. It is anticipated that by undertaking preliminary  
24 scoping work a better understanding can be gained of the nature and extent of patient safety  
25 concerns in the Bhutanese context and what is required to redress these.  
26  
27  
28  
29  
30  
31  
32  
33  
34  
35  
36

37 The aim of this study was to scope and describe what stakeholders (clinicians, health service  
38 managers, educators and policy makers) perceived and personally experienced as being the  
39 most common patient safety concerns in the Bhutanese healthcare system. The three research  
40 questions guiding the study were:  
41  
42  
43  
44  
45  
46  
47

- 48 • What are healthcare professionals' and managers' knowledge, perceptions,  
49 understanding, and experiences of patient safety in Bhutan's hospitals?  
50
- 51 • What factors do healthcare professionals and managers identify as most contributing  
52 to patient safety concerns in Bhutan's hospitals?  
53  
54  
55  
56  
57  
58  
59  
60

- What strategies do healthcare professionals and managers suggest are needed in order to address the patient safety issues and concerns they identified?

## **Methods**

### ***Study design***

This study was undertaken as a naturalistic inquiry using a Qualitative Exploratory Descriptive (QED) research approach. The QED research approach assists researchers to gain an understanding of the real world context as it is experienced by the participants – i.e., what is working and what is not working.<sup>23</sup> The approach enables the researcher to obtain a detailed account of the problem of concern and capture meaningful characteristics related to real life events.<sup>24</sup> Most importantly, QED research is appropriate in situations where the problem is not known or the problem is too complex to be captured by other methods (e.g., questionnaire survey).<sup>23</sup> QED research is considered to be a highly pragmatic approach that enables the answering of concrete and practical ‘what’ kinds of question,<sup>23 25</sup> such as those addressed in this study.

### ***Settings and participants***

The study was conducted in 2013 in three levels of hospital (district, regional referral and national referral), a training institute and the Ministry of Health in Bhutan<sup>26</sup>. A sample of 94 participants (doctors, nurses, ward managers, senior managers and health assistants) was purposively recruited and interviewed. Additionally, 46 healthcare professionals participated in Nominal Group Meetings (NGMs) (Table 1).

**Table 1.** Demographic characteristics of participants

| <i>Participant group</i>           | <i>Characteristic</i>                    |                     |                          |
|------------------------------------|------------------------------------------|---------------------|--------------------------|
| In-depth interview participants    | <b><i>Gender</i></b>                     | <b><i>N (%)</i></b> |                          |
|                                    | Male                                     | 56 (59.6%)          |                          |
|                                    | Female                                   | 38 (40.4%)          |                          |
|                                    | <b><i>Age</i></b>                        | <b><i>Years</i></b> | <b><i>Mean (yrs)</i></b> |
|                                    | Minimum                                  | 23                  | 36.7                     |
|                                    | Maximum                                  | 60                  |                          |
|                                    | <b><i>Professional qualification</i></b> | <b><i>N (%)</i></b> |                          |
|                                    | Certificate                              | 6 (6%)              |                          |
|                                    | Diploma                                  | 33 (35%)            |                          |
|                                    | Bachelor                                 | 23 (25%)            |                          |
|                                    | Master                                   | 32 (34%)            |                          |
|                                    | <b><i>Length of service</i></b>          | <b><i>Years</i></b> | <b><i>Mean (yrs)</i></b> |
|                                    | Minimum                                  | 0.5                 | 12.7                     |
|                                    | Maximum                                  | 29                  |                          |
| Nominal Group Meeting participants | <b><i>Gender</i></b>                     | <b><i>N (%)</i></b> |                          |
|                                    | Male                                     | 24 (52%)            |                          |
|                                    | Female                                   | 22 (47.8%)          |                          |
|                                    | <b><i>Age</i></b>                        | <b><i>Years</i></b> | <b><i>Mean (yrs)</i></b> |
|                                    | Minimum                                  | 24                  | 35.6                     |
|                                    | Maximum                                  | 50                  |                          |
|                                    | <b><i>Professional qualification</i></b> | <b><i>N (%)</i></b> |                          |
|                                    | Certificate                              | 2 (4.34%)           |                          |
|                                    | Diploma                                  | 26 (56.5%)          |                          |
|                                    | Bachelor                                 | 9 (19.6%)           |                          |
|                                    | Master                                   | 9 (19.6%)           |                          |
|                                    | <b><i>Length of service</i></b>          | <b><i>Years</i></b> | <b><i>Mean (yrs)</i></b> |
|                                    | Minimum                                  | 0.5                 | 10.2                     |
|                                    | Maximum                                  | 22                  |                          |

### ***Patient and public involvement***

As the aim of this study was to scope and describe what healthcare professionals perceived and personally experienced as being the most common patient safety concerns in the Bhutanese healthcare system no patients were involved in this study.

### ***Data collection procedure***

Data were collected via in-depth interviews (n=94) and NGMs (n=5). Participants for in-depth interviews were invited through direct contact, flyers posted on staff noticeboards and invitation letters sent to participating wards/institutes. They were interviewed individually using broad semi-structured interview questions to elicit knowledge, perceptions, and experiences of patient safety in Bhutan. Participants for NGMs were nominated by their managers and the NGMs were conducted in different groups according to criterion based characteristics such as doctors, nurses and managers. To facilitate smooth NGMs, a nominal group task statement form, which specified the exploratory questions, was used to list the critical elements of the patient safety issues. Duration of individual interviews and NGMs ranged from 45 to 120 minutes.

Approval was received from the Research Ethics Board of Health, Ministry of Health, Bhutan (REBH/Approval/2012/018) and organisational consent was obtained from the five research sites from which participants were recruited and other materials were retrieved. Ethics approval was also obtained from the Human Research Ethics Committee of Deakin University. All participants were informed about the nature and purpose of the study and provided verbal or written consent prior to interview or participation in a NGM.

### ***Data analysis***

Narrative data obtained from interviews and NGMs were analysed using the following steps: verbatim transcription of audio-recordings, active reading of transcripts, making notes on general themes, re-reading transcripts, comparing transcripts with key themes and concepts, making categories describing all aspects of the content, excluding unusable content or fillers, re-reading transcripts alongside the finally agreed list of categories, and making adjustments as necessary<sup>27</sup>. The data collected and analysed are reported and discussed in aggregate in this article - no additional data is available.

### **Results**

This study revealed eight major patient safety concerns, possible factors contributing to them, and recommendations for strategies which could be used for addressing the concerns identified. The results are presented according to these areas.

#### **Patient safety issues and concerns**

Participants identified the following patient safety issues: medication/drug errors, healthcare associated infections, surgical errors and post-operative complications, diagnostic errors, laboratory/testing errors, injurious falls, communication errors, and patient identification errors (themes and supporting quotes are provided in Table 2).

*Medication/drug errors:* Medication error was the most common patient safety concern identified. Errors included administering wrong drugs to the wrong patient, administering drugs that had passed their expiry date, giving the wrong drug dose, continuation of drugs for unjustified periods of time, and drug omissions (failure to administer prescribed drugs). 'Irrational' use of drugs was also described, manifested as prescribing of: large quantities of

1  
2  
3 drugs; high drug doses that could not be justified or were outside recommended doses; and  
4  
5 antibiotics to treat non-bacterial infections or viral conditions.  
6  
7

8  
9 *Healthcare Associated Infections (HAIs):* Post-surgery wound infections and urinary tract  
10  
11 infections (due to healthcare professionals not adhering to sterile technique during  
12  
13 catheterisation) were the two main HAIs identified.  
14  
15

16  
17 *Surgical errors and post-operative complications:* Notable among the surgical-related patient  
18  
19 safety concerns were retention of foreign objects (e.g., gauze or instruments). In some  
20  
21 instances, surgical errors resulted in mortality.  
22  
23

24  
25 *Diagnostic errors:* Errors in diagnosis were perceived as common (e.g., wrongly diagnosing  
26  
27 a patient as having tuberculosis, when they had cancer, and vice versa).  
28  
29

30  
31 *Laboratory/blood testing errors:* Incompatible blood transfusion errors were reported.  
32  
33  
34 Common laboratory/blood testing errors included performing wrong or unnecessary blood  
35  
36 investigations, and issuing wrong laboratory reports.  
37  
38

39  
40  
41 *Fall injuries:* This involves patients falling from beds and trolleys.  
42  
43

44  
45  
46 *Communication errors:* Communication errors, verbal abuse and/or rude behavior towards  
47  
48 patients, and failure to communicate clearly to patients about their disease and treatment were  
49  
50 identified.  
51  
52



1  
2  
3 *Patient identification errors:* The lack of a formal patient identification system was reported.  
4  
5 This was considered particularly problematic since Bhutanese people often have the same or  
6  
7 similar names. A major consequence of this was the risk and incidence of patients receiving  
8  
9 the wrong treatment or procedure.  
10  
11  
12

13 **Table 2.** Patient safety issues and concerns  
14

| Themes                                  | Participant statements                                                                                                                                                                                                                                                                                                                                                                                                                                                                                                                                                           |
|-----------------------------------------|----------------------------------------------------------------------------------------------------------------------------------------------------------------------------------------------------------------------------------------------------------------------------------------------------------------------------------------------------------------------------------------------------------------------------------------------------------------------------------------------------------------------------------------------------------------------------------|
| Medication/drug errors                  | <p data-bbox="548 667 1346 905">“I think the most common is errors in drug doses and medications. [...] medication error includes errors in giving IV fluids like sometimes wrong IV fluids, wrong rate of administration – improper calculation of the drop rates” (Medical doctor).</p> <p data-bbox="548 1010 1346 1247">“[...] misuse of antibiotics – sometimes you continue antibiotics even for cough and cold where it is not required. They [doctors] use high dosage of different antibiotics for organisms that are not sensitive” (Medical doctor).</p>              |
| Healthcare Associated Infections (HAIs) | <p data-bbox="548 1291 1346 1528">“Infection is definitely an issue. Previously where I used to work, [...] in a small district hospital, usually patient with small surgery – minor surgery was getting post-surgery wound infection. Wound not healing faster” (Senior Manager).</p> <p data-bbox="548 1633 1346 1871">“We do come across hospital acquired infections – people especially with long term hospitalisation tend to get urinary tract infections. I don’t know how people [healthcare providers] are handling the catheterisation process” (Medical doctor).</p> |

|                                                  |                                                                                                                                                                                                                                                                                                                                                                                                                                                          |
|--------------------------------------------------|----------------------------------------------------------------------------------------------------------------------------------------------------------------------------------------------------------------------------------------------------------------------------------------------------------------------------------------------------------------------------------------------------------------------------------------------------------|
| Surgical errors and post-operative complications | “We always hear from the operation theatre that some gauze pieces or some instrument has been left inside” (Nurse).                                                                                                                                                                                                                                                                                                                                      |
| Diagnostic errors                                | “They [doctors] misdiagnose and then sometimes they give wrong medication which I have seen in one case that the patient really had adverse effect” (Nurse).                                                                                                                                                                                                                                                                                             |
| Laboratory/blood testing errors                  | “Sometimes there are few laboratory mistakes. I don’t know whether it is the printing mistakes, sometimes we send two samples almost within 2 to 3 hours gap and the report come completely different. Maybe because staff are giving wrong sample for the other patient or is the printing mistake from the lab [...]. We have cases like same patient having done the same investigations in few hours showed vast difference in the reading” (Nurse). |
| Fall injuries                                    | “While patient is transferred in the trolley there was one incident where the patient went off the trolley. And then few times we have heard patient falling from the bed. So fall is common” (Ward Manager).                                                                                                                                                                                                                                            |
| Communication errors                             | “Most of the time the misunderstanding that happens between the patient and the staff is due to lack of adequate communication. Many a times what we have done is for example probably not spend enough time on that part - explaining the diagnosis, where is the problem, what medicine you are prescribing, how you need to take that medicine, what are the side effects of the medicines, all these things, you know” (Senior Manager - NGM1).      |

|                               |                                                                                                                                                                                                                             |
|-------------------------------|-----------------------------------------------------------------------------------------------------------------------------------------------------------------------------------------------------------------------------|
|                               | “I think one complaint we hear is that of verbal abuse by the health professionals to patients and their relatives” (Senior Manager).                                                                                       |
| Patient identification errors | “I think one pertinent one is for lack of patient identification marks. Our Bhutanese have similar names and then that can lead to, during procedures in rush hours, doing procedures in a wrong patient” (Medical doctor). |

### **Factors contributing to patient safety concerns**

Human (staff) and system factors were identified as the main contributing factors to patient safety concerns (themes and supporting quotes are presented in Table 3).

#### ***Human (staff) factors***

**Lack of patient safety competency:** The most commonly cited factor contributing to patient safety concerns was healthcare professionals’ lack of patient safety competencies, encompassing lack of knowledge of patient safety principles and processes, not having the necessary skills to practice safely, and not displaying the ‘right’ attitude.

#### ***Knowledge***

Lack of knowledge about quality improvement and patient management processes was identified as a major contributing factor to patient safety concerns. Medication errors and HAIs were linked to healthcare professionals’ lacking requisite knowledge about medicines/drugs and infection control.

### *Skills*

Healthcare professionals' lack of patient assessment skills, for example, not checking vital signs, not taking a detailed patient history, or failure to review a patient's history, were perceived as contributing to errors such as wrong patient diagnoses and treatment.

### *Attitudes*

The most prominent issue identified was a complacent attitude among healthcare professionals (e.g. taking 'shortcuts' and carelessness). Examples included healthcare professionals not applying knowledge, despite knowing about patient safety measures, and not apportioning sufficient importance to Standard Operating Protocols and guidelines.

### *System (organizational) factors*

*Lack of resources:* All categories of participants reported that shortage of staff (poor skill mix and staff-patient ratio) was the key contributing factor to diagnostic and medication errors. Also perceived to contribute to patient safety concerns was the lack of infrastructure. This included: a lack of rooms to isolate patients with infectious diseases, to store clinical items (e.g., sterilised packs), and to carry out procedures without disruption and contamination; lack of basic materials and equipment for infection control such as disinfectants, soaps, and wound dressing supplies; dusty hospital surroundings; and absence of adequate systems to monitor hospital infection rates. Diagnostic errors were believed to be related to lack of adequate investigative resources (e.g., laboratory reagents) and lack of functional and reliable diagnostic equipment.

1  
2  
3 *Lack of policies, guidelines and protocols on patient safety:* As a consequence of the lack of  
4 policies, guidelines, standard protocols and checklists, there was perceived variation in the  
5 management of patients across different hospitals and/or wards, with treating specialists and  
6 nurses not agreeing on treatment matters.  
7  
8  
9  
10

11  
12  
13 *Poor communication and collaboration:* Healthcare professionals failing to communicate  
14 verbally and not clearly documenting patient care were reported to contribute to patient safety  
15 concerns. For example, continuation of medications for unreasonable periods of time was  
16 perceived to have resulted from poor communication between doctors and nurses. Lack of  
17 clear communication with and provision of information to patients about their disease and  
18 treatment was reported to lead to poor compliance with treatment.  
19  
20  
21  
22  
23  
24  
25  
26  
27

28 Lack of teamwork and collaboration among hospital departments and clinicians were  
29 perceived to be particularly problematic. Internal conflicts and ‘tribal fights’ were reported,  
30 with stakeholders trying to blame and ‘pull each other’s legs’ (which in Bhutan is taken to  
31 mean ‘belittling’), disrupting workplace harmony, respect and cooperation. Participants  
32 described difficulty coordinating members of departments, due to lack of cooperation.  
33  
34  
35  
36  
37  
38  
39  
40

41 *Lack of management support and governance:* Some participants believed patient safety, as  
42 an agenda, had been overlooked by leaders and managers. Patient safety and risk  
43 management have not yet permeated into the Bhutanese healthcare system, and management  
44 was perceived as not yet ready to accept change.  
45  
46  
47  
48  
49  
50  
51  
52  
53  
54  
55  
56  
57  
58  
59  
60

*Poorly developed patient safety incident reporting:* Incident reporting processes were reportedly poorly developed. For instance, robust systems did not exist to record and report incidents and it was perceived that as a result the majority of incidents went unreported.

*Lack of patient education on patient safety:* Participants contended that patients are not educated about infection control and are not aware of how to take care of their own body secretions (sputum, urine and blood), increasing the risk of cross infection. In addition, healthcare professionals' failure to inform and educate patients and the public about certain hospital functions and procedures, such as where to go in the event of emergencies and signs and symptoms of emergencies, were perceived to have contributed to patient mortality.

**Table 3.** Factors contributing to patient safety concerns

| Themes                                                      | Participant statements                                                                                                                                                                                                                                                                                                                                                                                                             |
|-------------------------------------------------------------|------------------------------------------------------------------------------------------------------------------------------------------------------------------------------------------------------------------------------------------------------------------------------------------------------------------------------------------------------------------------------------------------------------------------------------|
| <i>Human (staff) factors</i>                                |                                                                                                                                                                                                                                                                                                                                                                                                                                    |
| Lack of patient safety competency:                          |                                                                                                                                                                                                                                                                                                                                                                                                                                    |
| <ul style="list-style-type: none"> <li>Knowledge</li> </ul> | <p>“Sometimes the medication errors usually happen because they [staff] aren't aware of the right method to be given. For example, there are some medications like [name of drugs withheld] which are really painful and it should not be given direct bolus, but it should rather be given as infusion. [...] It so happens that they are given bolus and then we have to be facing a problem and solving it” (Nurse - NGM5).</p> |
| <ul style="list-style-type: none"> <li>Skills</li> </ul>    | <p>“One issue is - usually the patients are seen in [...] OPD [Out-patient Department] and they are sent here [to the ward]. So they [clinicians] did not monitor the vital signs and then we had some</p>                                                                                                                                                                                                                         |

|                                                               |                                                                                                                                                                                                                                                                                                                                                                                                                                                                                    |
|---------------------------------------------------------------|------------------------------------------------------------------------------------------------------------------------------------------------------------------------------------------------------------------------------------------------------------------------------------------------------------------------------------------------------------------------------------------------------------------------------------------------------------------------------------|
|                                                               | <p>incidents. [...] [one patient] did not have vital signs monitored and did not have [Blood Pressure checked] - actually the patient was 'walking dead'. Then we had to manage here in the ward and then ultimately send to ICU" (Ward Manager).</p>                                                                                                                                                                                                                              |
| <ul style="list-style-type: none"> <li>• Attitudes</li> </ul> | <p>"It is the attitude [of healthcare providers] sometimes" (Ward Manager).</p> <p>"If I have to say, I think certain procedures are done by people who are not very cautious about taking precautions. For example, as a medical student we knew that we have to take lots of precaution even to insert a catheter but now I see that it is being done very casually. I don't think people are really taking care of the proper sterile techniques and all" (Medical doctor).</p> |
| <i>System (organizational) factors</i>                        |                                                                                                                                                                                                                                                                                                                                                                                                                                                                                    |
| Lack of resources                                             | <p>"Contribution for medication error maybe due to the shortage of nursing staff where while they are preparing the medicine, they have to go and attend the other critical cases, if any" (Senior Manager).</p> <p>"I think the most common patient safety issue is establishing diagnosis. I find it as a major issue because patients are not properly followed up and then adequate investigating facilities are not available and we lose patient in between" (Nurse).</p>    |
| Lack of policies, guidelines and                              | <p>"One is the standard management of patient. That depends on individual specialists and individual doctors. A major crux of the</p>                                                                                                                                                                                                                                                                                                                                              |

|                                                                                                                                                                                                                                                    |                                                                                                                                                                                                                                                                                                                                                                                                                                                                                                                                                                                                                                                                                                                                                                                         |
|----------------------------------------------------------------------------------------------------------------------------------------------------------------------------------------------------------------------------------------------------|-----------------------------------------------------------------------------------------------------------------------------------------------------------------------------------------------------------------------------------------------------------------------------------------------------------------------------------------------------------------------------------------------------------------------------------------------------------------------------------------------------------------------------------------------------------------------------------------------------------------------------------------------------------------------------------------------------------------------------------------------------------------------------------------|
| <p>1<br/>2<br/>3 protocols on patient<br/>4 safety<br/>5<br/>6<br/>7<br/>8<br/>9<br/>10</p>                                                                                                                                                        | <p>thing is how to come to a proper diagnosis and what line of treatment. So, highly qualified specialists have their own line of management which some specialists don't agree" (Senior Manager).</p>                                                                                                                                                                                                                                                                                                                                                                                                                                                                                                                                                                                  |
| <p>11<br/>12 Poor communication<br/>13 and collaboration<br/>14<br/>15<br/>16<br/>17<br/>18<br/>19<br/>20<br/>21<br/>22<br/>23<br/>24<br/>25<br/>26<br/>27<br/>28<br/>29<br/>30<br/>31<br/>32<br/>33<br/>34<br/>35<br/>36<br/>37<br/>38<br/>39</p> | <p>"When I talk about the patient safety one thing is that there is a gap in between doctors and nurses because they prescribe antibiotics and it goes more than 20 to 30 days. [...] Doctors, when they prescribe the drugs in ward, most of the doctors they use [name of drugs withheld] which is a 3<sup>rd</sup> generation antibiotic and they do not write the specific days, like for this many days" (Nurse).</p> <p>"As of now we have a problem in getting all departments together to get a good care of the patient. For example, in the emergency we see lot of cases which need to be consulted with different departments – interdepartmental consultation. [...] But at the moment it is very difficult to have an interdepartmental consultation" (Ward Manager).</p> |
| <p>40<br/>41 Lack of management<br/>42 support and<br/>43 governance<br/>44<br/>45<br/>46<br/>47<br/>48<br/>49<br/>50<br/>51<br/>52<br/>53<br/>54<br/>55<br/>56<br/>57</p>                                                                         | <p>"Patient safety in Bhutan, in my honest opinion, there isn't anything happening. We have some visiting professors and we have some health volunteers, they come in and they try to suggest and our staff, one or two maybe, try to take initiatives or people who have seen other hospital they think we need to do something. But it is ailing, because the system is not ready to accept anything. Right now, the health system is only considered about getting drugs and how many beds we can put and how many staff we can recruit but</p>                                                                                                                                                                                                                                      |



|                                                    |                                                                                                                                                                                                                                                                                                                                              |
|----------------------------------------------------|----------------------------------------------------------------------------------------------------------------------------------------------------------------------------------------------------------------------------------------------------------------------------------------------------------------------------------------------|
|                                                    | there is no check on how safe are the patients” (Nurse).                                                                                                                                                                                                                                                                                     |
| Poorly developed patient safety incident reporting | “I think that [incident reporting] is the weakest in the health system here. Keeping the data and then recording and reporting is very, very poor in the healthcare system- be it in National Referral Hospital or District Hospitals” (Medical doctor).                                                                                     |
| Lack of patient education on patient safety        | “I think in the hospital settings when we talk about safety of the patient and the factors, basically patients were not educated on infection control so thereby they are not able to take care of their own secretions like sputum or urine or even blood. So that is one factor that we are likely to have infections” (Health Assistant). |

### Strategies to improve patient safety

Participants identified six strategies to improve patient safety: instituting governance for patient safety, development/improvement of physical infrastructure/environment, providing adequate resources, providing patient safety training and education, promoting communication and information systems, and changing the attitudes and behaviour of healthcare professionals (themes and supporting quotes are provided in Table 4).

***Instituting governance for patient safety:*** Institution of patient safety governance was identified as an important strategy to improve patient safety processes and practices. Participants argued a hospital patient safety program with a committee structure (e.g., patient safety, mortality, and clinical governance committees) reporting to the Ministry of Health would advance patient safety. To reduce risk of harm to patients, participants recommended implementation of robust policies, guidelines and protocols.

1  
2  
3  
4  
5 ***Development/improvement of physical infrastructure/environment:*** Participants highlighted  
6  
7 the importance to patient safety of safe physical infrastructure and a safe environment. Safe  
8  
9 infrastructure was characterised as strong buildings with adequate ‘space’; good navigation  
10  
11 systems (e.g., signage); an inbuilt oxygen system, ramps, electric elevators, a ventilation  
12  
13 system and good natural lighting. A safe environment was characterised as promoting  
14  
15 physical safety, such as providing patients with an orientation on admission and maintaining  
16  
17 cleanliness. The provision of equipment, such as wheel chairs and beds with side rails, was  
18  
19 also deemed to be core elements of patient safety.  
20  
21  
22  
23

24 ***Providing adequate resources:*** Having adequate resources – including skilled and educated  
25  
26 healthcare professionals, functional equipment and a constant supply of drugs – was  
27  
28 considered critical to patient safety. Access to reliable laboratory facilities was considered  
29  
30 necessary to facilitate correct patient diagnoses, treatment and management.  
31  
32  
33  
34

35 ***Providing patient safety training and education for healthcare professionals:*** Healthcare  
36  
37 professionals (including doctors) were perceived to have inadequate knowledge about the  
38  
39 concept and practice of patient safety. Developing clear guidelines, protocols and programs to  
40  
41 train and educate healthcare professionals about patient safety before they entered practice  
42  
43 was considered essential to improving patient safety.  
44  
45  
46  
47

48 ***Promoting communication and information systems:*** Promoting communication and patient  
49  
50 safety information systems was seen as important to patient safety. For participants, patient  
51  
52 safety could be advanced by improving teamwork and interpersonal relationships among  
53  
54 healthcare professionals, and by instituting mechanisms to monitor patient safety.  
55  
56  
57  
58

**Changing the attitudes and behaviours of healthcare professionals:** Changing healthcare professionals' attitudes was considered critical to improving patient safety processes. Provision of education on patient safety in pre-service courses, and throughout employment, was considered essential to shaping the attitudes of and promoting respectful behaviour among healthcare professionals.

**Table 4.** Strategies to improve patient safety

| Themes                                                         | Participant statements                                                                                                                                                                                                                                                                                                                                                                                                                                                                                                                                                                                  |
|----------------------------------------------------------------|---------------------------------------------------------------------------------------------------------------------------------------------------------------------------------------------------------------------------------------------------------------------------------------------------------------------------------------------------------------------------------------------------------------------------------------------------------------------------------------------------------------------------------------------------------------------------------------------------------|
| Instituting governance for patient safety                      | “One thing is to constitute committees, especially relevant committees like clinical governance committees. [...] [...] We have to have regular updates, discussions [...] Certain bodies like quality control, mortality committee and clinical governance are very important” (Medical doctor).                                                                                                                                                                                                                                                                                                       |
| Development/improvement of physical infrastructure/environment | “[...] the infrastructure should be such that it promotes smooth flow of patients. Patients should not get confused. They should not get lost in a health facility. [...] the infrastructure should be in a normal condition, for example, the air flow, the exposure to sun should be good, so that we use minimum advance technologies like heating system, cooling system [...]” (Senior Manager).<br><br>“[...] we need some trolleys, the oxygen and everything should be there and IV stands. We have the elevator here but it is not always working. So the patient sometimes gets locked inside |

|                                                                              |                                                                                                                                                                                                                                                                                                                                                                                                                                                                                                                                                                                                    |
|------------------------------------------------------------------------------|----------------------------------------------------------------------------------------------------------------------------------------------------------------------------------------------------------------------------------------------------------------------------------------------------------------------------------------------------------------------------------------------------------------------------------------------------------------------------------------------------------------------------------------------------------------------------------------------------|
|                                                                              | the elevator. We need good electricity” (Ward Manager).                                                                                                                                                                                                                                                                                                                                                                                                                                                                                                                                            |
| Providing adequate resources                                                 | “To improve patient safety in district hospital like ours, I think the first and foremost things we should have is enough staff. We should have enough equipment” (Nurse).                                                                                                                                                                                                                                                                                                                                                                                                                         |
| Providing patient safety training and education for healthcare professionals | “I think first and foremost most of the health workers don’t have the concept of patient safety. Even doctors we are trained in different countries” (Medical doctor).                                                                                                                                                                                                                                                                                                                                                                                                                             |
| Promoting communication and information systems                              | “There should be proper communication between patient and the visitors and patient themselves, and also among healthcare workers because often a time there is a lot of miscommunication. This could ultimately pose a threat to patient safety” (Nurse).                                                                                                                                                                                                                                                                                                                                          |
| Changing the attitudes and behaviours of healthcare professionals            | <p>“First and foremost is the notion that keeping patient safety is not the responsibility of the managers or the leaders. Every individual should take each and every service or an activity in line with patient safety. [...] Patient safety has to be on our mind all the time” (Medical doctor).</p> <p>“It is not easy to change the attitude of people but maybe through our education system or through the training centre curriculum from day one till they leave the institute might have a role in changing the attitude and providing better safety to patient” (Senior Manager).</p> |

## Discussion

The Bhutanese government has prioritised improving the quality of its healthcare services. However, achieving the improvements desired is proving to be difficult. A key reason for this relates to the levels of complexity involved in providing high quality services, which cannot be addressed without a well-structured dedicated program of patient safety. Arguably, one of the most striking findings of this study is the lack of a program or infrastructure for capturing quantifiable and independently verifiable data on patient safety outcomes. Despite this, the study participants identified problems and patient safety outcomes that were commensurate with those identified in other countries. The mainstream patient safety issues and contributing factors (human and system factors) identified in this study were commensurate with those found in the UK,<sup>28</sup> US,<sup>29</sup> Australia,<sup>30 31</sup> Latin America,<sup>32</sup> Thailand<sup>33</sup> and India.<sup>34-36</sup> Participants identified medication errors, HAIs, surgical errors and post-operative complications, diagnostic errors, laboratory/blood errors, fall injuries, information/communication errors and patient identification errors as key patient safety concerns in the Bhutanese healthcare system. Factors contributing to these concerns were perceived to include the system (latent failures) as well as human (staff) factors (slips, lapses and violations). Further, the strategies recommended by participants in this study are comparable to those tried and tested in other countries.<sup>37-39</sup> Participants recommended: instituting clinical governance, developing/improving physical infrastructure (including equipment), providing adequate human resources, providing patient safety education to healthcare professionals and patients, and promoting communication and information systems.

In light of the findings of this study, patient safety interventions in the Bhutanese healthcare system may need to be targeted at several points in the hierarchy, starting with policy

1  
2  
3 development, and extending to assessment and management of risk, and the implementation  
4 of processes for reducing the incidence and impact of preventable adverse events.  
5 Specifically, patient safety improvement efforts need to focus on system/organisational  
6 factors. Addressing the system/organisational factors identified in this study would help to  
7 improve the overall healthcare system safety culture, which is now widely recognised in the  
8 patient safety literature as being critical to reducing the incidence and impact of preventable  
9 adverse events.<sup>40-42</sup>

10  
11  
12  
13  
14  
15  
16  
17  
18  
19  
20 One of the key recommendation made by participants in this study was to institute  
21 governance for patient safety: instituting patient safety monitoring committees and  
22 developing clear patient safety guidance documents. As suggested by this finding, a highly  
23 visible and functional patient safety committee/program within Bhutan's Ministry of Health  
24 and guidance documents are needed, in conjunction with secure and adequate funding to  
25 make significant improvements in patient safety. Such a safety program needs to include  
26 clear goals for safety; defining safety and risk management systems (including developing  
27 tools for identifying and analysing adverse events, and evaluating approaches taken to solve  
28 issues). Literature suggests that the institution of patient safety committees (including the  
29 establishment of national patient safety foundations and in-hospital patient safety  
30 committees) and patient safety guidance documents are imperative to enhancing patient  
31 safety in healthcare.<sup>43-45</sup> The essential functions that patient safety committees can serve  
32 include: overseeing patient safety programs, developing expertise and managing resources.<sup>46-</sup>

33  
34  
35  
36  
37  
38  
39  
40  
41  
42  
43  
44  
45  
46  
47  
48  
49  
50  
51  
52  
53  
54  
55  
56  
57  
58  
59  
60  
<sup>48</sup> Development of clear patient safety guidance documents could improve patient safety in  
the Bhutanese healthcare system by establishing minimum levels of performance,  
maintaining consistency or uniformity across multiple individuals and organisations, setting  
expectations about what is to be achieved and fostering a shared set of beliefs, attitudes and

1  
2  
3 norms, and prevent variation in clinical practice.<sup>43 45 49-54</sup> Most importantly, development of  
4 adjunct guidance documents by the Bhutan Ministry of Health (with explicit process maps  
5 and decision trees detailing what healthcare professionals should do during the course of  
6 patient care) would help change the attitudes and behaviours of healthcare professionals.  
7  
8  
9  
10

11  
12  
13 As suggested by the findings of this study, development and/or improvement of physical  
14 infrastructure/environment (including equipment), providing adequate human resources,  
15 providing patient safety education to healthcare professionals and patients, and promoting  
16 communication and information systems, are also fundamental to improving patient safety.  
17  
18 Research suggests that there is a positive relationship between these components and patient  
19 safety. For example, the lack of and/or poorly organised physical infrastructure or  
20 environment can have a significant impact on patient safety – including, for example, cross  
21 infection and falls.<sup>38 55-60</sup> The higher the ratio of qualified healthcare professionals to patients  
22 the better the patient safety outcomes - lower rates of medication errors and wound  
23 infections.<sup>61-68</sup> Patient safety education and training programs have been shown to increase  
24 healthcare professionals' ability to analyze and solve patient safety problems.<sup>69 70</sup> Promoting  
25 communication and information systems such as information technology or decision support  
26 systems such as computerised physician order entry, which are designed to assist healthcare  
27 professionals in applying new information to patient care through the analysis of patient  
28 specific variables, are believed to improve communication on all levels.<sup>71-74</sup> For instance,  
29 computerised devices like Personal Digital Assistant, which provide useful and accurate  
30 clinical practice guidelines and an alert system have been found to be more efficient than  
31 their paper-based counterparts.<sup>75</sup>  
32  
33  
34  
35  
36  
37  
38  
39  
40  
41  
42  
43  
44  
45  
46  
47  
48  
49  
50  
51  
52  
53  
54  
55  
56  
57  
58  
59  
60

1  
2  
3 On the basis of the findings of this study, and in keeping with the immediate priorities for  
4 national action on matters of patient safety, the cornerstone for a comprehensive strategy to  
5 improve patient safety in the Bhutanese healthcare system involves (1) a national focus on  
6 patient safety; (2) leadership, tools and protocols to enhance the knowledge base about safety;  
7 (3) patient safety governance; and (4) patient safety education and training.  
8  
9  
10  
11  
12  
13  
14

### 15 National focus on patient safety

16  
17 A national focus on patient safety entails setting national standards for patient safety;  
18 developing a strategic framework for patient safety; establishing a national patient safety  
19 program; instituting a national patient safety governance committee; establishing well trained  
20 and supported patient safety consultation teams (groups with specific responsibility for  
21 patient safety); and developing national policies on patient safety (service policy to establish  
22 resource allocation; practice policy that depicts minimum level of safety management and  
23 treatments; governance policy; sentinel event policy which provides clear guidance on  
24 appropriate responses to such situations; educational policy; and patient/staff abuse policy).  
25  
26 As recommended by the World Health Organisation,<sup>76</sup> patient safety policy and strategy  
27 should be aligned with existing national priorities.  
28  
29  
30  
31  
32  
33  
34  
35  
36  
37  
38  
39  
40  
41

### 42 Leadership for patient safety

43  
44 Leadership to promote patient safety involves launching patient safety initiatives in hospitals;  
45 allocating a budget for patient safety initiatives and ensuring they are adequately resourced;  
46 initiating change management programs to build support for patient safety by the leaders of  
47 various health programs; developing research agendas (to understand the nature and extent of  
48 patient safety concerns; implement effective strategies to improve patient safety; and conduct  
49 research focused on teaching and learning of patient safety concerns and solutions); and  
50  
51  
52  
53  
54  
55  
56  
57  
58  
59  
60



1  
2  
3 establishing measures of performance (e.g., developing and disseminating tools for  
4 identifying and analysing patient safety concerns and evaluating correction measures).  
5  
6  
7

#### 8 9 Patient safety governance

10  
11 Governance for patient safety requires development of a patient safety framework and policy;  
12  
13 developing and implementing practice standards and guidelines for clinical practices and  
14  
15 procedures; developing and implementing clinical bundles, pathways and protocols related to  
16  
17 specific medical conditions and practices; developing and implementing checklists for  
18  
19 different clinical practices, procedures and technologies/equipment; improving existing  
20  
21 quality assurance processes; and developing clear job descriptions.  
22  
23  
24  
25

#### 26 27 Patient safety training and education

28  
29 Continuing patient safety training and education should be provided to all categories of  
30  
31 healthcare staff (including cleaners and ward aides/assistants). This involves developing  
32  
33 educational curricula on patient safety in institutes, universities and hospitals (for all  
34  
35 categories of healthcare professionals undertaking certificate, diploma, higher degrees, and  
36  
37 continuing medical education); developing and implementing standard protocols and  
38  
39 guidelines for supervision and monitoring of students and junior clinicians; promoting  
40  
41 dissemination of information on best practices; and providing healthcare professionals with  
42  
43 training in risk management.  
44  
45  
46  
47

48  
49 In addition, development of a program to identify and address specific patient safety issues is  
50  
51 recommended. The mechanisms to assure, monitor and continually improve patient safety  
52  
53 and quality of care must be built into the foundations of the health system.<sup>77</sup> This includes  
54  
55 addressing medication safety, surgical errors, diagnostic errors, laboratory/blood products,  
56  
57

1  
2  
3 identification errors, HAIs and falls injuries by adopting six key methods of data collection  
4 and measurement, encompassing: patient outcome measurements (mortality and morbidity  
5 statistics); auditing of clinical practice, resource use and program activities; measurement of  
6 patient satisfaction; systematic reporting and monitoring of patient safety data; and patient  
7 safety research. These processes help in detecting and monitoring a broad range of medical  
8 errors and solutions.<sup>50 78-81</sup> Strategies to address specific patient safety issues include, for  
9 example, patient identification by bracelet, correct labelling of medicines, implementation of  
10 unit-dose systems for medications, policies for blood transfusion and implementation of  
11 guidelines and/or protocols for the prevention of wrong patient, wrong site and wrong  
12 surgical procedure.  
13  
14  
15  
16  
17  
18  
19  
20  
21  
22  
23  
24  
25

### 26 **Strengths and limitations**

27  
28 A key strength of this study is the contribution it makes to a deeper awareness and  
29 understanding of the patient safety issues and concerns in the cultural context of Bhutan.  
30  
31 Analysis of the data revealed the issues and concerns identified were commensurate with  
32 those experienced in other resource poor countries including the challenges of successfully  
33 addressing them. The main limitation of the study reported here is its reliance on patient  
34 safety concepts, theories and practices that have been developed and applied in high-income  
35 resource-rich nations. This, however, is also a strength of the study, since one of its aims was  
36 to explore the 'fit' or otherwise of such a frame in under-resourced and data-poor nations, and  
37 to make meaningful comparisons. On the basis of the comparisons made, establishing a  
38 foundation for informing a locally adapted program to address patient safety problems/issues  
39 identified in Bhutan has been rendered possible. A second limitation of the study relates to  
40 the large amount of data generated. As previously reported<sup>26</sup>, decisions about inclusion and  
41 exclusion of data were informed by the consistency of findings across the disparate  
42  
43  
44  
45  
46  
47  
48  
49  
50  
51  
52  
53  
54  
55  
56  
57  
58  
59  
60

1  
2  
3 participant groups and the themes and/or issues that were pertinent to informing the patient  
4 safety concerns in the healthcare context of Bhutan. In this process it is possible that some  
5 material may have been lost.  
6  
7  
8  
9

## 10 11 **Conclusion**

12  
13 This study pioneers the exploration of patient safety issues and concerns in Bhutan's  
14 healthcare system. The study has identified medication errors, HAIs, surgical errors and post-  
15 operative complications, diagnostic errors, laboratory/blood errors, fall injuries,  
16 communication errors and patient identification errors as key patient safety concerns. Factors  
17 contributing to these concerns were identified to include system as well as human factors.  
18 The strategies recommended by participants indicate that a system to mitigate risks caused by  
19 both human and system factors is required to improve patient safety in Bhutan's healthcare  
20 system.  
21  
22  
23  
24  
25  
26  
27  
28  
29  
30

31  
32  
33 Overall, this study has provided a basis upon which future research and patient safety  
34 improvement strategies can be identified and developed. An immediate strategy, based on the  
35 findings of this study, would be to conceptualise and position patient safety as a priority for  
36 Bhutan's healthcare system and its leaders. Interventions need to target several points in the  
37 hierarchy, starting from policy development and extending to assessment and management of  
38 risk, and to reducing the incidence and impact of disruptive behaviours. Additionally, the  
39 provision of patient safety training and education for healthcare professionals and patients is  
40 required. These strategies would help improve overall safety by preventing adverse events.  
41  
42  
43  
44  
45  
46  
47  
48  
49  
50  
51  
52  
53  
54  
55  
56  
57  
58  
59  
60

**Acknowledgement**

The authors sincerely thank Dr Megan-Jane Johnstone for her helpful comments on this article and for her support for this research.

**Conflict of interest**

The authors declare that there is no conflict of interest

**Funding:** The author(s) received no financial support for the research, authorship, and/or publication of this article.

**Data sharing statement:** No additional data are available.

**Authors' contribution:**

The first author conceived the study. Both authors designed the study and developed the study protocol. RP collected and analysed the data. The second author (AH) supervised data collection and data analysis. Both authors prepared and approved this paper.

## References

1. Donaldson L. Championing patient safety: going global. *Qual Saf Health Care* 2002;11:112. [published Online First: Jun]
2. World Health Organization. Final technical report for the conceptual framework for the international classification for patient safety, version 1.1. Chapter: The international classification for patient safety key concepts and preferred terms. 2009e. [http://www.who.int/patientsafety/taxonomy/icps\\_full\\_report.pdf](http://www.who.int/patientsafety/taxonomy/icps_full_report.pdf) (accessed 1 March 2012).
3. World Health Organization. Patient safety research. 2012b. <http://www.who.int/patientsafety/research/en/> (accessed 15 April, 2012).
4. World Health Organization. Global priorities for patient safety research: better knowledge for safer care. 2009a. [http://whqlibdoc.who.int/publications/2009/9789241\\_eng.pdf](http://whqlibdoc.who.int/publications/2009/9789241_eng.pdf) (accessed 13 April, 2012 ).
5. Jha AK, Prasopa-Plaizier N, Larizgoitia I, et al. Patient safety research: an overview of the global evidence. *Qual Saf Health Care* 2010;19:42-47.
6. Yoelao D, Mohan KP, Hamid HSA. A Review of Patient Safety in Thailand and Malaysia. *Int J Behav Sci* 2014;9:53-70.
7. Siddiqi S, Elasady R, Khorshid I, et al. Patient safety friendly hospital initiative: from evidence to action in seven developing country hospitals. *Int J Qual Health Care* 2012;24:144-51.
8. Hernandez K, Ramos E, Seas C, et al. Incidence of and risk factors for surgical-site infections in a Peruvian hospital. *Infect Control Hosp Epidemiol* 2005;26:473-77.
9. Charuluxananan S, Sriraj W, Lapisatepun W, et al. Drug errors from Thailand Anesthesia Incidents Study (Thai AIMS): analysis of 1,996 incident reports: 17AP2□8. *Eur J Anaesthesiol* 2012;6:541-47.

10. Jirapaet V, Jirapaet K, Sopajaree C. The Nurses ' Experience of Barriers to Safe Practice in the Neonatal Intensive Care Unit in Thailand. *J Obstet Gynecol Neonatal Nurs* 2006;35:746-54.
11. Taxis K, Barber N. Causes of intravenous medication errors: an ethnographic study. *Qual Saf Health Care* 2003;12:343-48.
12. Reason JT. Understanding adverse events: human factors. *Qual Health Care* 1995;4:80-89.
13. Reason JT. Human error: models and management. *BMJ* 2000;320:768-70.
14. Reason JT. Beyond the organisational accident: the need for "error wisdom" on the frontline. *Qual Saf Health Care* 2004;13:ii28-ii33.
15. Reason JT. Human error. Cambridge: Cambridge University Press 1990.
16. Reason JT. Safety in the operating theatre – Part 2: Human error and organisational failure. *Qual Saf Health Care* 2005;14:56–60.
17. Cronenwett L, Sherwood G, Barnsteiner J, et al. Quality and safety education for nurses. *Nurs Outlook* 2007;55:122-31.
18. Cowan DT, Norman I, Coopamah VP. Competence in nursing practice: a controversial concept-a focused review of literature. *Nurse Educ Today* 2005;25:355-62.
19. Chuenjitwongsa S, Oliver RG, Bullock AD. Competence, competency-based education, and undergraduate dental education: a discussion paper. *Eur J Dent Educ* 2018;22:1-18.
20. Garside JR, Nhemachena JZZ. A concept analysis of competence and its transition in nursing. *Nurse Educ Today* 2013;33:541-45.
21. Madigosky WS, Headrick LA, Nelson K, et al. Changing and sustaining medical students' knowledge, skills, and attitudes about patient safety and medical fallibility. *Acad Med* 2006;81:94-101.

- 1  
2  
3 22. Schall R, Stone PW, Currie L, et al. Development of a self-report instrument to measure  
4 patient safety attitudes, skills, and knowledge. *J Nurs Scholarsh* 2008;40:391-94.  
5  
6  
7 23. Patton MQ. Qualitative research & evaluation methods. 3rd ed. Thousand Oaks,  
8 California: Sage Publications 2002.  
9  
10  
11 24. Sandelowski M. Whatever happened to qualitative description? *Res Nurs Health*  
12 2000;23:334-40.  
13  
14  
15 25. Brink PJ, Wood MJ. Advanced design in nursing research 2nd ed. California: Sage 1998.  
16  
17 26. Pelzang R. Patient safety issues and concerns in Bhutan's healthcare system: a qualitative  
18 study. Deakin University, 2016.  
19  
20  
21 27. Smith J, Firth J. Qualitative data analysis: the framework approach. *Nurse Res*  
22 2011;18:52-62.  
23  
24  
25 28. Healey F, Scobie S, Oliver D, et al. Falls in English and Welsh hospitals: a national  
26 observational study based on retrospective analysis of 12 months of patient safety  
27 incident reports. *Qual Saf Health Care* 2008;17:424-30.  
28  
29  
30 29. Linden JV, Wagner K, Voytovich AE, et al. Transfusion errors in New York State: an  
31 analysis of 10 years' experience. *Transfusion* 2000;40:1207-13.  
32  
33  
34 30. Kable AK, Gibberd RW, Spigelman AD. Adverse events in surgical patients in Australia.  
35 *Int J Qual Health Care* 2002;14:269-76.  
36  
37  
38 31. Nichols P, Copeland T, Craib IA, et al. Learning from error: identifying contributory  
39 causes of medication errors in an Australian hospital. *Med J Aust* 2008;188:276-79.  
40  
41  
42 32. Aranaz-Andres JM, Aibar-Rejon C, Limon-Ramirez R, et al. Prevalence of adverse  
43 events in the hospitals of five Latin American countries: results of the 'Iberoamerican  
44 study of adverse events' (IBEAS). *BMJ Qual Saf* 2012;20:1043-51.  
45  
46  
47  
48  
49  
50  
51  
52  
53  
54  
55  
56  
57  
58  
59  
60

- 1  
2  
3 33. Asavaroengchai S, Sriratanaban J, Hiransuthikul N, et al. Identifying adverse events in  
4 hospitalized patients using global trigger tool in Thailand. *Asian Biomed* 2009;3:545-  
5 50.  
6  
7  
8  
9 34. Datta P, Rani H, Chauhan R, et al. Health-care-associated infections: Risk factors and  
10 epidemiology from an intensive care unit in Northern India. *Indian J Anaesth*  
11 2014;58:30-35.  
12  
13  
14  
15 35. Harrison R, Cohen AW, Walton M. Patient safety and quality of care in developing  
16 countries in Southeast Asia: a systematic literature review. *Int J Qual Health Care*  
17 2015;27:240–54.  
18  
19  
20  
21  
22 36. Kumar S, Chaudhary S. Medical errors and consequent adverse events in critically ill  
23 surgical patients in a tertiary care teaching hospital in Delhi. *J Emerg Trauma Shock*  
24 2009;2:80-84.  
25  
26  
27  
28 37. Elkin PL, Gorman PN. Continuing medical education and patient safety: an agenda for  
29 lifelong learning. *J Am Med Inform Assoc* 2002;9:S128-S32.  
30  
31  
32  
33 38. Hignett S, Lu J. Space to care and treat safely in acute hospitals: recommendations from  
34 1866 to 2008. *Appl Ergon* 2010;41:666-73.  
35  
36  
37  
38 39. Reiling J, Breckbill C, Murphy M, et al. Facility Designing Around Patient Safety and its  
39 Effect on Nursing. *Nurs Econ* 2003;21:143-47.  
40  
41  
42 40. Morello RT, Lowthian JA, Barker AL, et al. Strategies for improving patient safety  
43 culture in hospitals: a systematic review. *BMJ Qual Saf* 2013;22:11-18.  
44  
45  
46 41. Vogus TJ, Weick KE, Sutcliffe KM. Doing No Harm: Enabling, Enacting, and  
47 Elaborating a Culture of Safety in Health Care. *Acad Manag Perspect* 2010;24:60-77.  
48  
49  
50 42. Zaheer S, Ginsburg L, Chuang YT, et al. Patient safety climate (PSC) perceptions of  
51 frontline staff in acute care hospitals: examining the role of ease of reporting, unit  
52  
53  
54  
55  
56  
57  
58  
59  
60



- 1  
2  
3 norms of openness, and participative leadership. *Health Care Manage Rev*  
4  
5 2015;40:13-23.  
6  
7 43. Kohn LT, Corrigan JM, Donaldson MS. To err is human: Building a safer health system.  
8  
9 Washington D.C.: National Academy Press 2000.  
10  
11 44. Clinical Excellence Commission. Patient safety research: A review of the technical  
12  
13 literature The centre for Clinical Research, University of New South Wales, Sydney  
14  
15 Donald Hindle, Jeffrey Braithwaite and Rick Ledema 2005.  
16  
17 45. Adibi H, Khalesi N, Ravaghi H, et al. Development of an effective risk management  
18  
19 system in a teaching hospital. *Journal Diabetes Metab Disord* 2012;11:15.  
20  
21 46. Boddington R, Arthur H, Cummings D, et al. Team Resource Management and patient  
22  
23 safety: A team focused approach to clinical governance. *Clin Govern Int J* 2006;11:58  
24  
25 - 68.  
26  
27 47. Sage WM, Gallagher TH, Armstrong S, et al. How policy makers can smooth the way for  
28  
29 communication-and-resolution programs *Health Aff* 2014;33:11-19.  
30  
31 48. Scott I. What are the most effective strategies for improving quality and safety of health  
32  
33 care? *Intern Med J* 2009;39:389-400.  
34  
35 49. Szymanska M, Ryan CA, Murphy BP. Introducing random safety audits (RSA) in a  
36  
37 neonatal intensive care unit (NICU). *Ir Med J* 2011;104:114-17.  
38  
39 50. Ursprung R, Gray JE, Edwards WH, et al. Real time patient safety audits: improving  
40  
41 safety every day. *Qual Saf Health Care* 2005;14:284-89.  
42  
43 51. McDonald R, Waring J, Harrison S, et al. Rules and guidelines in clinical practice: a  
44  
45 qualitative study in operating theatres of doctors' and nurses' views. *Qual Saf Health*  
46  
47 *Care* 2005;14:290-94.  
48  
49 52. Classen DC, Kilbridge PM. The roles and responsibility of physicians to improve patient  
50  
51 safety within health care delivery system. *Acad Med* 2002;77:963-72.  
52  
53  
54  
55  
56  
57  
58  
59  
60

- 1  
2  
3 53. Institute of Medicine. Crossing the Quality Chasm: A New Health System for the 21st  
4  
5 Century. Washington, D.C: National Academies Press 2001.  
6  
7 54. Nolan TW. System changes to improve patient safety. *BMJ* 2000;320:771-73.  
8  
9 55. Flynn EA, Barker KN, Gibson JT, et al. Relationships between ambient sounds and the  
10 accuracy of pharmacists' prescription-filling performance. *Hum Factors* 1996;38:614-  
11 22.  
12  
13 56. Mahmood A, Chaudhury H, Valente M. Nurses' perceptions of how physical environment  
14 affects medication errors in acute care settings. *Appl Nurs Res* 2011;24:229-37.  
15  
16 57. Muto CA, Jernigan JA, Ostrowsky BE, et al. SHEA guideline for preventing nosocomial  
17 transmission of multidrug-resistant strains of *Staphylococcus aureus* and  
18 enterococcus. *Infect Control Hosp Epidemiol* 2003;24:362-86.  
19  
20 58. Reiling J, Knutzen BL, Wallen TK, et al. Enhancing the traditional hospital design  
21 process: a focus on patient safety. *Jt Comm J Qual Saf* 2004;30:115-24.  
22  
23 59. Rubin HR. Status report--an investigation to determine whether the built environment  
24 affects patients' medical outcomes. *J Healthc Des* 1998;10:11-13.  
25  
26 60. Walsh-Sukys M, Reitenbach A, Hudson-Barr D, et al. Reducing light and sound in the  
27 neonatal intensive care unit: an evaluation of patient safety, staff satisfaction and  
28 costs. *J Perinatol* 2001;21:230-35.  
29  
30 61. Archibald LK, Manning ML, Bell LM, et al. Patient density, nurse-to-patient ratio and  
31 nosocomial infection risk in a pediatric cardiac intensive care unit. *Pediatr Infect Dis*  
32 *J* 1997;16:1045-48.  
33  
34 62. Hugonnet S, Chevrolet JC, Pittet D. The effect of workload on infection risk in critically  
35 ill patients. *Crit Care Med* 2007;35:76-81.  
36  
37 63. Lichtig LK, Knauf RA, Milholland DK. Some impacts of nursing on acute care hospital  
38 outcomes. *J Nur Adm* 1999;29:25-33.  
39  
40  
41  
42  
43  
44  
45  
46  
47  
48  
49  
50  
51  
52  
53  
54  
55  
56  
57  
58  
59  
60

- 1  
2  
3 64. Nantsupawat A, Nantsupawat R, Kulnaviktikul W, et al. Relationship between nurse  
4 staffing levels and nurse outcomes in community hospitals, Thailand. *Nurs Health Sci*  
5 2014 [published Online First: April 4]  
6  
7  
8  
9 65. Needleman J, Buerhaus P, Mattke S, et al. Nurse-staffing levels and the quality of care in  
10 hospitals. *N Engl J Med* 2002;346:1715-22.  
11  
12  
13 66. Robertson RH, Hassan M. Staffing intensity, skill mix and mortality outcomes: the case  
14 of chronic obstructive lung disease. *Health Serv Manage Res* 1999;12:258-68.  
15  
16  
17 67. Stegenga J, Bell E, Matlow A. The role of nurse understaffing in nosocomial viral  
18 gastrointestinal infections on a general pediatrics ward. *Infect Control Hosp*  
19 *Epidemiol* 2002;23:133-36.  
20  
21  
22  
23 68. McGillis HL, Doran D, Pink GH. Nurse staffing models, nursing hours, and patient safety  
24 outcomes. *J Nurs Adm* 2004;34:41-45.  
25  
26  
27  
28 69. Patey R, Flin R, Cuthbertson BH, et al. Patient safety: helping medical students  
29 understand error in healthcare. *Qual Saf Health Care* 2007;16:256-59.  
30  
31  
32  
33 70. Chopra V, Gesink BJ, de Jong J, et al. Does training on an anaesthesia simulator lead to  
34 improvement in performance? *Br J Anaesth* 1994;73:293-97.  
35  
36  
37  
38 71. Koppel R, Metlay JP, Cohen A, et al. Role of computerized physician order entry systems  
39 in facilitating medication errors. *JAMA* 2005;293:1197-203.  
40  
41  
42  
43 72. Bates DW, Kuperman G, Teich JM. Computerized physician order entry and quality of  
44 care. *Qual Manag Health Care* 1994;2:18-27.  
45  
46  
47  
48 73. Bates DW, Spell N, Cullen DJ, et al. The costs of adverse drug events in hospitalized  
49 patients. Adverse Drug Events Prevention Study Group. *JAMA* 1997;277:307-11.  
50  
51  
52  
53 74. Wong J, Beglaryan H. Strategies for hospitals to improve patient safety: A review of the  
54 research. 2004. <http://www.psnet.ahrq.gov/resource.aspx?resourceID=1341> (accessed  
55 6 August 2014).  
56  
57  
58  
59  
60

- 1  
2  
3 75. VanDenKerkhof EG, Goldstein DH, Lane J, et al. Using a personal digital assistant  
4 enhances gathering of patient data on an acute pain management service: a pilot study.  
5 *Can J Anaesth* 2003;50:368-75.  
6  
7  
8  
9  
10 76. World Health Organization. A handbook for National quality policy and strategy (NQPS):  
11 a practical approach to development of policy and strategy on improving quality of  
12 health care, co-developed by the World Health Organization and countries embarking  
13 on national quality initiatives 2018 [Available from:  
14 <https://www.who.int/servicedeliverysafety/areas/qhc/NQPS-webinar2017.pdf?ua=1>  
15 accessed 3 June, 2018 2018.  
16  
17  
18  
19  
20  
21  
22 77. World Health Organization. Delivering quality health services: a global imperative for  
23 universal health coverage. 2018.  
24 [https://scholar.google.com.au/scholar?hl=en&as\\_sdt=0%2C5&q=Delivering+quality+](https://scholar.google.com.au/scholar?hl=en&as_sdt=0%2C5&q=Delivering+quality+health+services+A+global+imperative+for+universal+health+coverage+by+OECD%2FWorld+Bank%2FWHO+report+launched+last+week+at+the+World+Health+Assembly&btnG=)  
25 [health+services+A+global+imperative+for+universal+health+coverage+by+OECD%](https://scholar.google.com.au/scholar?hl=en&as_sdt=0%2C5&q=Delivering+quality+health+services+A+global+imperative+for+universal+health+coverage+by+OECD%2FWorld+Bank%2FWHO+report+launched+last+week+at+the+World+Health+Assembly&btnG=)  
26 [2FWorld+Bank%2FWHO+report+launched+last+week+at+the+World+Health+Asse](https://scholar.google.com.au/scholar?hl=en&as_sdt=0%2C5&q=Delivering+quality+health+services+A+global+imperative+for+universal+health+coverage+by+OECD%2FWorld+Bank%2FWHO+report+launched+last+week+at+the+World+Health+Assembly&btnG=)  
27 [mbly&btnG=](https://scholar.google.com.au/scholar?hl=en&as_sdt=0%2C5&q=Delivering+quality+health+services+A+global+imperative+for+universal+health+coverage+by+OECD%2FWorld+Bank%2FWHO+report+launched+last+week+at+the+World+Health+Assembly&btnG=) (accessed 2 June, 2018).  
28  
29  
30  
31  
32  
33  
34  
35 78. Garrouste-Orgeas M, Philippart F, Bruel C, et al. Overview of medical errors and adverse  
36 events. *Ann Intensive Care* 2012;2:2-10.  
37  
38  
39 79. Jarernsiriornkul N, Krska J, Capps PA, et al. Patient reporting of potential adverse drug  
40 reactions: a methodological study. *Br J Clin Pharmacol* 2002;53:318-25.  
41  
42  
43  
44 80. Piotrowski MM, Hinshaw DB. The safety checklist program: creating a culture of safety  
45 in intensive care unit. *Jt Comm J Qual Improv* 2002;28:306-15.  
46  
47  
48 81. Wolff AM, Bourke J. Reducing medical error: a practical guide. *Med J Aust*  
49 2000;173:247-51.  
50  
51  
52  
53  
54  
55  
56  
57  
58  
59  
60

1  
2  
3  
4  
5  
6  
7  
8  
9  
10  
11  
12  
13  
14  
15  
16  
17  
18  
19  
20  
21  
22  
23  
24  
25  
26  
27  
28  
29  
30  
31  
32  
33  
34  
35  
36  
37  
38  
39  
40  
41  
42  
43  
44  
45  
46  
47  
48  
49  
50  
51  
52  
53  
54  
55  
56  
57  
58  
59  
60

For peer review only

## Standards for Reporting Qualitative Research (SRQR)\*

<http://www.equator-network.org/reporting-guidelines/srqr/>

Page/line no(s).

### Title and abstract

|                                                                                                                                                                                                                                                              |         |
|--------------------------------------------------------------------------------------------------------------------------------------------------------------------------------------------------------------------------------------------------------------|---------|
| <p><b>Title</b> - Concise description of the nature and topic of the study Identifying the study as qualitative or indicating the approach (e.g., ethnography, grounded theory) or data collection methods (e.g., interview, focus group) is recommended</p> | 1 and 3 |
| <p><b>Abstract</b> - Summary of key elements of the study using the abstract format of the intended publication; typically includes background, purpose, methods, results, and conclusions</p>                                                               | 3       |

### Introduction

|                                                                                                                                                                     |       |
|---------------------------------------------------------------------------------------------------------------------------------------------------------------------|-------|
| <p><b>Problem formulation</b> - Description and significance of the problem/phenomenon studied; review of relevant theory and empirical work; problem statement</p> | 4 - 6 |
| <p><b>Purpose or research question</b> - Purpose of the study and specific objectives or questions</p>                                                              | 6 - 7 |

### Methods

|                                                                                                                                                                                                                                                                                                                                                                                                             |        |
|-------------------------------------------------------------------------------------------------------------------------------------------------------------------------------------------------------------------------------------------------------------------------------------------------------------------------------------------------------------------------------------------------------------|--------|
| <p><b>Qualitative approach and research paradigm</b> - Qualitative approach (e.g., ethnography, grounded theory, case study, phenomenology, narrative research) and guiding theory if appropriate; identifying the research paradigm (e.g., postpositivist, constructivist/ interpretivist) is also recommended; rationale**</p>                                                                            | 7 - 10 |
| <p><b>Researcher characteristics and reflexivity</b> - Researchers' characteristics that may influence the research, including personal attributes, qualifications/experience, relationship with participants, assumptions, and/or presuppositions; potential or actual interaction between researchers' characteristics and the research questions, approach, methods, results, and/or transferability</p> | 1 - 10 |
| <p><b>Context</b> - Setting/site and salient contextual factors; rationale**</p>                                                                                                                                                                                                                                                                                                                            | 7 - 8  |
| <p><b>Sampling strategy</b> - How and why research participants, documents, or events were selected; criteria for deciding when no further sampling was necessary (e.g., sampling saturation); rationale**</p>                                                                                                                                                                                              | 7 - 8  |
| <p><b>Ethical issues pertaining to human subjects</b> - Documentation of approval by an appropriate ethics review board and participant consent, or explanation for lack thereof; other confidentiality and data security issues</p>                                                                                                                                                                        | 9      |
| <p><b>Data collection methods</b> - Types of data collected; details of data collection procedures including (as appropriate) start and stop dates of data collection and analysis, iterative process, triangulation of sources/methods, and modification of procedures in response to evolving study findings; rationale**</p>                                                                             | 9      |

|                       |                                                                                                                                                                                                                                                       |       |
|-----------------------|-------------------------------------------------------------------------------------------------------------------------------------------------------------------------------------------------------------------------------------------------------|-------|
| 1<br>2<br>3<br>4<br>5 | <b>Data collection instruments and technologies</b> - Description of instruments (e.g., interview guides, questionnaires) and devices (e.g., audio recorders) used for data collection; if/how the instrument(s) changed over the course of the study | 9     |
| 6<br>7<br>8           | <b>Units of study</b> - Number and relevant characteristics of participants, documents, or events included in the study; level of participation (could be reported in results)                                                                        | 7 - 8 |
| 9<br>10<br>11<br>12   | <b>Data processing</b> - Methods for processing data prior to and during analysis, including transcription, data entry, data management and security, verification of data integrity, data coding, and anonymization/de-identification of excerpts    | 10    |
| 13<br>14<br>15<br>16  | <b>Data analysis</b> - Process by which inferences, themes, etc., were identified and developed, including the researchers involved in data analysis; usually references a specific paradigm or approach; rationale**                                 | 10    |
| 17<br>18<br>19<br>20  | <b>Techniques to enhance trustworthiness</b> - Techniques to enhance trustworthiness and credibility of data analysis (e.g., member checking, audit trail, triangulation); rationale**                                                                | 10    |

## Results/findings

|                      |                                                                                                                                                                                                   |         |
|----------------------|---------------------------------------------------------------------------------------------------------------------------------------------------------------------------------------------------|---------|
| 23<br>24<br>25<br>26 | <b>Synthesis and interpretation</b> - Main findings (e.g., interpretations, inferences, and themes); might include development of a theory or model, or integration with prior research or theory | 10 - 23 |
| 27<br>28<br>29       | <b>Links to empirical data</b> - Evidence (e.g., quotes, field notes, text excerpts, photographs) to substantiate analytic findings                                                               | 10 - 23 |

## Discussion

|                                  |                                                                                                                                                                                                                                                                                                                                                                                                             |         |
|----------------------------------|-------------------------------------------------------------------------------------------------------------------------------------------------------------------------------------------------------------------------------------------------------------------------------------------------------------------------------------------------------------------------------------------------------------|---------|
| 32<br>33<br>34<br>35<br>36<br>37 | <b>Integration with prior work, implications, transferability, and contribution(s) to the field</b> - Short summary of main findings; explanation of how findings and conclusions connect to, support, elaborate on, or challenge conclusions of earlier scholarship; discussion of scope of application/generalizability; identification of unique contribution(s) to scholarship in a discipline or field | 24 - 29 |
| 38<br>39                         | <b>Limitations</b> - Trustworthiness and limitations of findings                                                                                                                                                                                                                                                                                                                                            | 29 - 30 |

## Other

|                |                                                                                                                                               |    |
|----------------|-----------------------------------------------------------------------------------------------------------------------------------------------|----|
| 42<br>43<br>44 | <b>Conflicts of interest</b> - Potential sources of influence or perceived influence on study conduct and conclusions; how these were managed | 31 |
| 45<br>46       | <b>Funding</b> - Sources of funding and other support; role of funders in data collection, interpretation, and reporting                      | 31 |

\*The authors created the SRQR by searching the literature to identify guidelines, reporting standards, and critical appraisal criteria for qualitative research; reviewing the reference lists of retrieved sources; and contacting experts to gain feedback. The SRQR aims to improve the transparency of all aspects of qualitative research by providing clear standards for reporting qualitative research.

1  
2  
3  
4  
5  
6  
7  
8  
9  
10  
11  
12  
13  
14  
15  
16  
17  
18  
19  
20  
21  
22  
23  
24  
25  
26  
27  
28  
29  
30  
31  
32  
33  
34  
35  
36  
37  
38  
39  
40  
41  
42  
43  
44  
45  
46  
47  
48  
49  
50  
51  
52  
53  
54  
55  
56  
57  
58  
59  
60

\*\*The rationale should briefly discuss the justification for choosing that theory, approach, method, or technique rather than other options available, the assumptions and limitations implicit in those choices, and how those choices influence study conclusions and transferability. As appropriate, the rationale for several items might be discussed together.

**Reference:**

O'Brien BC, Harris IB, Beckman TJ, Reed DA, Cook DA. **Standards for reporting qualitative research: a synthesis of recommendations.** *Academic Medicine*, Vol. 89, No. 9 / Sept 2014  
DOI: [10.1097/ACM.0000000000000388](https://doi.org/10.1097/ACM.0000000000000388)

For peer review only
